# Supplementary material for: Patient feedback for safety improvement in primary care: results from a feasibility study
Source: PubMed Central journal article supplement — BMJ Open. 2020 Jun 21;10(6):e037887. doi: 10.1136/bmjopen-2020-037887 (PMC7307531; doi:10.1136/bmjopen-2020-037887), 2020-06-21
Supplement: bmjopen-2020-037887.draft_revisions.pdf [file bmjopen-2020-037887.draft_revisions.pdf]

# BMJ Open

BMJ Open is committed to open peer review. As part of this commitment we make the peer review history of every article we publish publicly available.

When an article is published we post the peer reviewers' comments and the authors' responses online. We also post the versions of the paper that were used during peer review. These are the versions that the peer review comments apply to.

The versions of the paper that follow are the versions that were submitted during the peer review process. They are not the versions of record or the final published versions. They should not be cited or distributed as the published version of this manuscript.

BMJ Open is an open access journal and the full, final, typeset and author-corrected version of record of the manuscript is available on our site with no access controls, subscription charges or pay-per-view fees (<http://bmjopen.bmj.com>).

If you have any questions on BMJ Open's open peer review process please email [info.bmjopen@bmj.com](mailto:info.bmjopen@bmj.com)

# BMJ Open

## Patient feedback for safety improvement in primary care: Results from a feasibility study

|                               |                                                                                                                                                                                                                                                                                                                                                                                                                                                                                                                                                                                                                   |
|-------------------------------|-------------------------------------------------------------------------------------------------------------------------------------------------------------------------------------------------------------------------------------------------------------------------------------------------------------------------------------------------------------------------------------------------------------------------------------------------------------------------------------------------------------------------------------------------------------------------------------------------------------------|
| Journal:                      | <i>BMJ Open</i>                                                                                                                                                                                                                                                                                                                                                                                                                                                                                                                                                                                                   |
| Manuscript ID                 | bmjopen-2020-037887                                                                                                                                                                                                                                                                                                                                                                                                                                                                                                                                                                                               |
| Article Type:                 | Original research                                                                                                                                                                                                                                                                                                                                                                                                                                                                                                                                                                                                 |
| Date Submitted by the Author: | 20-Feb-2020                                                                                                                                                                                                                                                                                                                                                                                                                                                                                                                                                                                                       |
| Complete List of Authors:     | Hernan, Andrea; Deakin University, Deakin Rural Health<br>Giles, Sally; <span class="FO_hovorable_search_text">&lt;span class='FO_FirstWord'&gt;University&lt;/span&gt; of Manchester&lt;/span&gt;, NIHR Greater Manchester Primary Care Patient Safety Translational Research Centre<br/>Beks, Hannah; Deakin University, Deakin Rural Health<br/>McNamara, Kevin; Deakin University, Deakin Rural Health<br/>Kloot, Kate; Deakin University, Centre for Rural Emergency Medicine<br/>Binder, Marley; Deakin University, Deakin Rural Health<br/>Versace, Vincent; Deakin University, Deakin Rural Health</span> |
| Keywords:                     | Quality in health care < HEALTH SERVICES ADMINISTRATION & MANAGEMENT, PRIMARY CARE, QUALITATIVE RESEARCH, HEALTH SERVICES ADMINISTRATION & MANAGEMENT                                                                                                                                                                                                                                                                                                                                                                                                                                                             |
|                               |                                                                                                                                                                                                                                                                                                                                                                                                                                                                                                                                                                                                                   |

SCHOLARONE™  
Manuscripts

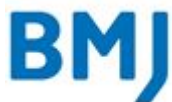

I, the Submitting Author has the right to grant and does grant on behalf of all authors of the Work (as defined in the below author licence), an exclusive licence and/or a non-exclusive licence for contributions from authors who are: i) UK Crown employees; ii) where BMJ has agreed a CC-BY licence shall apply, and/or iii) in accordance with the terms applicable for US Federal Government officers or employees acting as part of their official duties; on a worldwide, perpetual, irrevocable, royalty-free basis to BMJ Publishing Group Ltd ("BMJ") its licensees and where the relevant Journal is co-owned by BMJ to the co-owners of the Journal, to publish the Work in this journal and any other BMJ products and to exploit all rights, as set out in our [licence](#).

The Submitting Author accepts and understands that any supply made under these terms is made by BMJ to the Submitting Author unless you are acting as an employee on behalf of your employer or a postgraduate student of an affiliated institution which is paying any applicable article publishing charge ("APC") for Open Access articles. Where the Submitting Author wishes to make the Work available on an Open Access basis (and intends to pay the relevant APC), the terms of reuse of such Open Access shall be governed by a Creative Commons licence – details of these licences and which [Creative Commons](#) licence will apply to this Work are set out in our licence referred to above.

Other than as permitted in any relevant BMJ Author's Self Archiving Policies, I confirm this Work has not been accepted for publication elsewhere, is not being considered for publication elsewhere and does not duplicate material already published. I confirm all authors consent to publication of this Work and authorise the granting of this licence.

**TITLE PAGE**

Patient feedback for safety improvement in primary care: Results from a feasibility study

Authors: Andrea L Hernan<sup>1</sup>, Sally J Giles<sup>2</sup>, Hannah Beks<sup>1</sup>, Kevin Mc Namara<sup>1,3</sup>, Kate Kloot<sup>4</sup>, Marley J Binder<sup>1</sup>, Vincent L Versace<sup>1</sup>

## Author affiliations:

1. Deakin Rural Health, School of Medicine, Deakin University, Geelong, Victoria, Australia
2. NIHR Greater Manchester Patient Safety Translational Research Centre, Division of Population Health, Health Services Research and Primary Care School of Health Sciences, University of Manchester, Manchester, United Kingdom
3. Centre for Population Health Research, Deakin University, Geelong, Australia
4. Centre for Rural Emergency Medicine, Deakin University, Warrnambool, Victoria, Australia

## Corresponding author details:

Andrea L Hernan  
Deakin Rural Health  
School of Medicine, Deakin University  
Warrnambool  
Victoria, Australia 3280  
+613 5563 3505  
[andrea.hernan@deakin.edu.au](mailto:andrea.hernan@deakin.edu.au)

Word count manuscript: 3842

Word count abstract: 267

References: 73

Figures: 1

Tables: 4

Supplementary Files: 5

**ABSTRACT**

**Objectives:** Patient involvement in safety improvement is a developing area of research. The aim of this study was to investigate the feasibility of a patient feedback on safety intervention in primary care. Specifically, the intervention acceptability, fidelity, implementation enablers and barriers, scalability, and process of systematically collecting safety data were examined.

**Design, setting and participants:** Mixed methods feasibility trial with six purposively selected Australian primary care practices and patients.

**Intervention:** The intervention comprised an iterative process with a cycle of measurement, learning, feedback, action planning, and implementation period of six months.

**Primary and secondary outcomes:** Qualitative and quantitative data relating to feasibility measures (acceptability, fidelity, enablers, barriers, scalability, and process of collecting safety data) were collected and analysed.

**Results:** A total of n=1750 patients provided feedback on safety. There was a statistically significant increase in mean patient safety scores indicating improved safety (4.30 to 4.37, p=0.002). Staff deemed the intervention acceptable, with minor recommendations for improvement. Intervention fidelity was high and implementation enablers were attributed to the intervention structure and framework, use of intuitive problem solving approaches, and multidisciplinary team involvement. Practice-based safety interventions resulted in sustainable and measurable changes to systems for safety, such as increased access to care and improved patient information accuracy.

**Conclusions:** The findings indicate that this innovative patient feedback on safety intervention is feasible for scale-up to a larger effectiveness trial and further spread into policy and practice. This intervention complements existing safety improvement strategies and activities, and integrates into current patient feedback service requirements for Australian primary care. Further research is needed to examine the intervention effects on safety incident reduction.

### Strengths and limitations of this study

- A feasibility study was conducted prior to the development and implementation of a large-scale effectiveness trial and wider spread and uptake into policy and practice.
- Several feasibility domains were assessed including intervention acceptability, fidelity, implementation enablers and barriers, scalability, and process of systematically collecting safety data in a primary care.
- A mixed methods approach addressed each feasibility domain and included both qualitative and quantitative data collection and analysis.
- A limitation is that the data collected will be mostly descriptive, and, therefore, the generalisability of the findings may be limited to only one geographical area.

## INTRODUCTION

Involving patients in error prevention and harm reduction activities has gained traction over the past decade.<sup>1-7</sup> Patient engagement has been found to prevent or reduce adverse events, and increase awareness of potential safety risks.<sup>8</sup> Much of this research has centred on hospital settings with the majority of interventions utilising patient feedback mechanisms for safety improvement.<sup>3 8-12</sup> The evidence base regarding patient feedback on safety in primary care is considerably lacking by comparison.

In addition to reporting formal safety incidents<sup>13-16</sup>, patient feedback about processes, systems and structures that lead to safety incidents is an essential piece of the safety intelligence 'jigsaw'.<sup>17</sup> Patients have demonstrated understanding and knowledge about the various conditions in the latent environment that influence safety, such as access to care; communication systems; information and care planning; and transitions between care settings.<sup>17-20</sup> Capturing patient feedback about these contributory factors to safety incidents and using it for safety improvement work in primary care is a developing and novel field of research.<sup>21</sup>

Only one validated, real-time, and theory-derived patient feedback tool for assessment of factors contributing to safety in primary care is currently available - the Primary Care Patient Measure of Safety (PC PMOS).<sup>20 22</sup> The PC PMOS aims to enhance or complement current data collection methods for patient safety in primary care.<sup>20 22</sup> This self-administered tool is an acceptable, efficient, and appropriate mechanism for engaging patients in safety improvement.<sup>11 13 17 23</sup> The PC PMOS also facilitates primary care professionals and organisations learning, and drives implementation of real-time service improvements.<sup>20 21</sup>

The implementation and impact of interventions which use the PC PMOS tool for data-driven improvement and ongoing safety monitoring in primary care remains unexplored. Primary care, like most healthcare settings, is a complex system with multiple and multi-level factors likely to affect implementation of a patient feedback for safety improvement intervention.<sup>24</sup> While common

1  
2  
3 barriers and enablers to implementation of quality and safety improvement interventions have been  
4 published,<sup>25-27</sup> the specific processes and outcomes of using the PC PMOS in a primary care safety  
5 improvement intervention is unknown. Advocates for complexity science and implementation  
6 science in healthcare-improvement-research recommend feasibility studies be conducted prior to  
7 the introduction of large-scale effectiveness trials or wider spread into policy and practice.<sup>24 25 28-30</sup>  
8 Therefore, the aim of this study was to understand the acceptability, fidelity, implementation  
9 enablers and barriers, scalability, and process of systematically collecting safety data in a primary  
10 care patient feedback on safety intervention.

## 21 **METHODS**

22 A detailed description of the study design and sampling frame, intervention, and primary and  
23 secondary outcome measures has been published elsewhere.<sup>21</sup> A brief overview is provided below.

### 24 **Study design and sampling frame**

25 This was a mixed methods feasibility trial with six purposively sampled primary care practices from  
26 the southwest region of Victoria, Australia (Appendix 1).

### 27 **Intervention**

28 Intervention tool: PC PMOS

29 The PC PMOS tool is an anonymous 28 item survey covering nine latent conditions in the primary  
30 care environment influencing safety incidents including: access to care, communication, the external  
31 policy environment, information flow, organisation and care planning, patient related factors, the  
32 physical environment, referral systems, and task performance (available on request).<sup>20 22</sup> The PC  
33 PMOS consists of a five point Likert scale with higher scores indicating safer primary care. The PC  
34 PMOS also captures patient reported safety incident data.

35 Intervention phases



1  
2  
3 The intervention comprised an iterative process with a cycle of measurement, learning, feedback,  
4  
5 action planning, and implementation period of six months (Figure 1).  
6  
7

8 Patient feedback about the safety of their care was measured using the PC PMOS tool at baseline  
9  
10 (Time 1 – T1). Primary care teams then used patient feedback from the PC PMOS to develop and  
11  
12 implement specific safety interventions over a six-month period. Patient feedback about the safety  
13  
14 of their care was measured again (PC PMOS) at the end of the intervention period (Time 2 - T2).  
15  
16

17  
18 Primary care practices were asked to form Safety Improvement Teams (SIT). These teams comprised  
19  
20 a minimum of three members and included any combination of Practice Manager, Practice Nurse,  
21  
22 Receptionist or Administration staff, or General Practitioner.  
23  
24

25 SIT members participated in two learning and development workshops on teamwork,  
26  
27 communication, implementation planning, the Model for Improvement's (Mfi) Plan-Do-Study-Act  
28  
29 (PDSA) methodology,<sup>31</sup> and trial information.  
30  
31

32 PC PMOS data from each practice was collated and presented to the SIT at an action planning  
33  
34 meeting. SIT members considered which area(s) of safety improvement to target, and developed  
35  
36 Goals, Measures, Ideas, and PDSA cycles. SIT members were responsible for implementing and  
37  
38 monitoring their specific safety intervention/s through application of multiple PDSA cycles over the  
39  
40 six month period.  
41  
42  
43

#### 44 **Data collection**

##### 45 Primary outcome

46  
47  
48 Feasibility measures included acceptability, intervention fidelity, implementation enablers and  
49  
50 barriers, and scalability. These data were collected using three qualitative methods:  
51  
52

- 53  
54  
55 • recordings and overt observations of SIT members at workshops and action planning  
56  
57 meetings
- 58  
59 • semi-structured interviews with SIT members at trial conclusion  
60

- reflexive researcher journaling

Audio data were transcribed verbatim. Overt participant observation data were recorded using detailed field note diaries and regular researcher discussion and reflection.

## Secondary outcomes

### *Patient feedback on contributing factors to safety*

Every adult ( $\geq 18$  years) presenting for their appointment was invited by the practice receptionist to complete the PC PMOS over a three-week period. Patients returned their surveys via a secure survey return box in the practice waiting room. Surveys were anonymous and completion was voluntary.

### *Patient reported safety incidents and concerns*

The PC PMOS contains questions for patients to report any patient safety incident. Questions were adapted from the 'Patient Incident Reporting Tool' used in the Patient Reporting and Action for a Safe Environment intervention.<sup>32</sup> The PC PMOS has an 'other comments' free text question which also provides patients the opportunity to report safety incidents or concerns.

### *Staff safety culture*

The validated Agency for Healthcare Research and Quality Medical Office Survey (MOS) on Patient Safety<sup>33</sup> was used to obtain data about staff safety culture perceptions at baseline (T1) (prior to patient data collection) and after the intervention (T2). All staff were invited to complete the survey and return it to the researcher via a provided pre-paid envelope. Surveys were anonymous and completion was voluntary.

### *Safety incident reports*

Practice Managers provided a de-identified copy of their practice's clinical risk management/safety incident register from the previous 12 months at T1 and T2.

## **Data analysis**

### Primary outcome

Triangulation and thematic analysis techniques were employed to analyse the qualitative and content data. Both inductive and deductive approaches were used to undertake the analysis.<sup>34</sup> Deductive approaches utilised the literature about healthcare culture and safety improvement, patient feedback and response theory, health service implementation science, and engagement and adaption theory.<sup>25-27 35 36</sup> Inductive coding was also performed on qualitative and content data by three researchers (AH, SG, HB). The initial coding framework centred on the feasibility measures of intervention enablers, barriers, acceptability, fidelity, and scalability. This framework was expanded through constant comparison with the data to create the final coding framework. Discrepancies between researchers were resolved through discussion. NVivo (QSR International Pty Ltd) was used to support the analysis.

### *Intervention fidelity score*

Intervention fidelity refers to the implementation of safety improvement interventions being delivered as intended.<sup>37</sup> The number of safety interventions implemented at each practice was assessed by the research team using a three choice response option— yes, no, or partially.

### Secondary outcomes

Quantitative data were analysed using SPSS Statistics (IBM version 24). Continuous variables were compared pre- and post-intervention using t-tests, while comparisons for non-parametric data used the Mann–Whitney U test. Categorical variables were compared using chi square-tests. Results were considered statistically significant where  $p \leq 0.05$ .

The MOS percent positive scores for each ten patient safety culture composites, the average score across the ten composites, and the overall patient safety rating were calculated at T1 and T2 for each practice, and overall using t-tests.

### **Patient and Public Involvement**

1  
2  
3 Patients directly participated in the priority setting of safety interventions at a local level.  
4  
5 Specifically, patients concerns or experiences with systems for safety in the primary care  
6  
7 environment (e.g. access to care, communication, information and referral processes, organisation  
8  
9 and care planning) were acted on by primary care teams through development and implementation  
10  
11 of interventions which prevent safety incidents from occurring.  
12  
13  
14  
15  
16  
17

## 18 RESULTS

### 21 Primary outcome

22  
23 Representative participant quotes corresponding to feasibility measures are presented in Table 1.  
24  
25  
26  
27  
28

#### 29 Acceptability

##### 32 *Intervention acceptability*

33  
34  
35 The majority of staff found the intervention acceptable. Staff reported that the intervention was  
36  
37 predominantly positive and fitted within current organisational approaches to quality improvement.  
38  
39

##### 40 *Attitude towards patient feedback on safety*

41  
42  
43 All staff valued patient feedback on safety. Positive feedback was welcomed and viewed as  
44  
45 contributing to workplace morale, job satisfaction, and reassurance that staff were meeting patient  
46  
47 expectations. Feedback on safety was accepted when it aligned with staff awareness of issues.  
48  
49

50 Furthermore, staff acceptance of the patient's reality also influenced believability of the feedback.  
51

52  
53 Staff exhibited a range of responses to negative patient feedback, including: acceptance; feelings of  
54  
55 empathy, surprise, or uncertainty; or being dismissive of feedback.  
56  
57  
58  
59  
60

1  
2  
3 Commonly mentioned reasons for dismissing patient feedback involved unrealistic patient  
4 expectations; deeming patient concerns too problematic to fix or out of the practice's control;  
5  
6 previous attempts to solve the problem have failed; or the patient was a known difficult patient  
7  
8 (some staff speculated who a patient was even though the survey is anonymous).  
9

### 12 *Using patient feedback to make changes*

13  
14  
15 Some staff were cautious about using the patient feedback for safety improvement activity. They  
16 contextualised the feedback in terms of where it may be coming from and how appropriate it would  
17 be to respond. Additionally, some mentioned difficulties in choosing priority areas to address due to  
18 largely positive patient scores limiting what they could respond to.  
19  
20  
21  
22  
23

24  
25 Four of the six practice teams saw this trial as a catalyst for undertaking improvements that aligned  
26 with previously identified staff priorities, and not responding directly to the patient feedback. Two  
27 practice teams attempted to link their chosen safety interventions back to domains of safety on the  
28 PC PMOS. For example, improving waiting time or availability of appointments was a focus area for  
29 staff yet the PC PMOS scores relating to access to care were largely positive. The other two practices  
30 did not attempt to link their previously identified target area to a PC PMOS domain of safety. The  
31 remaining two practices chose to address areas that were directly related to areas of concern  
32 highlighted from the patient feedback. This was either a patient reported safety incident or a  
33 negatively scored PC PMOS domain.  
34  
35  
36  
37  
38  
39  
40  
41  
42  
43  
44  
45  
46  
47  
48

### 49 Implementation of safety interventions

#### 51 *Intervention fidelity*

52  
53  
54 The average intervention duration of 5.8 months was considered acceptable by most practice teams.  
55  
56  
57 Among the six practices, 25 safety improvement interventions were developed at the action  
58  
59  
60

1  
2  
3 planning meeting or during the implementation period. Of these, 17 (68%) were fully implemented,  
4  
5 2 (8%) partially implemented, and 6 (24%) not implemented.  
6  
7

8 The safety priorities targeted at the six practices included improvement in the following areas:  
9  
10 communication of patient recall and reminders, access to equipment and supplies, access to care,  
11  
12 accuracy of patient information, management of staff time, patient experience of waiting time, and  
13  
14 patient knowledge of registrar skills and abilities.  
15  
16

### 17 *Barriers and enablers to intervention development and implementation*

#### 18 19 20 Developing interventions

21  
22  
23 Staff employed both intuition and problem solving processes to develop safety interventions. This  
24  
25 process appeared to be an enabler for practice teams. This often took the form of a rapid and  
26  
27 informal root cause analysis where common sense and a pragmatic approach was apparent. This  
28  
29 process did not require external facilitation and staff were easily able to identify latent conditions in  
30  
31 the practice that contributed to the safety concern. Staff reported regular use of this approach for  
32  
33 safety and quality improvement activities unrelated to this project, but had not recognised it as  
34  
35 formal improvement work.  
36  
37

38  
39 Some teams experienced challenges with translating their intuitive problem solving approach onto  
40  
41 the Mfl framework. There was a perceived disconnect between the two problem solving methods.  
42  
43 This mainly related to adjusting to new habits or ways of working and adhering to a structured  
44  
45 process. Practice teams with greater quality improvement experience were better able to integrate  
46  
47 these approaches and adapt accordingly.  
48  
49

#### 50 51 Implementing interventions

52  
53  
54 The high intervention fidelity shown in this trial was attributed to various factors. One key enabler  
55  
56 was the multidisciplinary dynamic within the SIT. The teams largely consisted of a practice manager,  
57  
58 administration staff member, and a practice nurse. GPs adopted a more passive role in  
59  
60

1  
2  
3 implementation. Nonetheless, GPs were engaged and supportive of the SIT and provided leadership  
4 and support when needed.  
5  
6

7  
8 Practice managers and administration staff often took primary responsibility and ownership for  
9 safety intervention implementation. As the interventions addressed the latent conditions within the  
10 primary care system that contribute to safety incidents, the corresponding activities and tasks often  
11 required input from administration staff rather than clinical staff. For example, ensuring patient  
12 demographic information was up-to-date or improving appointment scheduling were viewed as  
13 tasks to be undertaken by administration staff who are skilled and knowledgeable in this area.  
14  
15

16  
17 Staff generally agreed that the Mfl was a useful and familiar structure for implementing safety  
18 interventions. However, a few teams experienced some implementation challenges relating to the  
19 prescriptive nature and linear processes proposed in the model. Lack of model flexibility and  
20 adaptability were commonly cited as implementation barriers.  
21  
22

23  
24 Staff also found measuring change difficult for various reasons. Identifying an appropriate measure  
25 directly relating to their safety intervention was challenging. For example, some staff indicated it  
26 was difficult to measure clinical outcomes or safety incidents averted. Often soft or proxy measures  
27 were used due to unavailability or inaccessibility of data.  
28  
29

30  
31 Staff identified a number of other barriers to implementation. These were common across all  
32 practices and included lack of protected time, demanding priorities particularly for patient care,  
33 issues with staff recruitment and retention as well as staff leave, power and team dynamics,  
34 management support, and engagement from the wider practice.  
35  
36  
37  
38  
39  
40  
41  
42  
43  
44  
45  
46  
47  
48  
49  
50

#### 51 Scalability

52  
53 Staff recommended some improvements to the structure and components of the intervention that  
54 would enable future scale-up to a larger effectiveness trial or spread into policy and practice (Box 1).  
55  
56  
57  
58  
59  
60

Existing practice infrastructure and resources were deemed adequate for participation.

The two learning workshops and facilitated action planning meeting with the research team were viewed as important. While the majority of staff felt that this level of facilitation was adequate, others suggested additional action planning meetings throughout the intervention phase would assist with accountability and implementation progress.

Patient data collection using the PC PMOS was considered relatively straightforward by practice staff. Only one practice (Practice A) failed to complete T2 data collection. Reasons for this included staff leave and patient survey fatigue. As the PC PMOS was a paper-based survey staff felt that improvements could centre on electronic data collection to increase the efficiency of real-time patient feedback, for example, via the use of waiting room iPads or emails to patients after their consultation.

### Secondary outcomes

Patient feedback on contributing factors to safety - PC PMOS scores

A total of n=1750 patients completed the PC PMOS at T1 and T2 (n=839 T1, n=911 T2), representing a practice mean of 140 and 182 at T1 and T2 respectively. The crude response rate was 10.7%, however the average response rate across the practices was 40.6%. Patient characteristics are presented in Table 2. Patients completing the PC PMOS were significantly more likely to be older and female (Appendix 2). Mean age was 56 years (SD 18.2) and mean number of visits to the practice in the previous 12 months was 8 (SD 8.6).

The PC PMOS total mean scores and domain scores for each practice at both times points are presented in Table 3. There was a significant increase in total mean PC PMOS score for all practices from T1 to T2 suggesting improved patient safety (4.30 (SD=0.49) to 4.37 (SD=0.47), p=0.002). There were also significant increases in mean scores for all practices from T1 to T2 for the following



1  
2  
3 domains: access to care (4.09 to 4.23,  $p<0.001$ ), communication (4.44 to 4.50,  $p=0.018$ ), information  
4  
5 flow (4.27 to 4.36,  $p=0.007$ ), and patient related factors (4.51 to 4.61,  $p<0.001$ ). There was within  
6  
7 and between practice variation for specific PC PMOS domain scores (Table 3).

#### 10 Patient reported safety incidents and concerns data

11  
12  
13 Patient reported safety incident data are presented in Table 4. There were  $n=11$  patient reported  
14  
15 safety incidents at T1, and  $n=9$  at T2. The mean severity rating at T1 and T2 was 7.4 (scale 1 to 10  
16  
17 with 10 being 'extremely serious'). The median preventability rating of these safety incidents was  
18  
19 'Definitely preventable' at T1, and 'Probably preventable' at T2.

20  
21  
22  
23 An additional  $n=17$  safety incidents at T1, and  $n=12$  at T2 were identified from the 'other comments'  
24  
25 section of the PC PMOS. Therefore, the total number of patient reported safety incidents was  $n=28$   
26  
27 at T1, and  $n=21$  at T2. The number of patient reported concerns (negative comments that were not a  
28  
29 patient safety incident) decreased from  $n=45$  at T1 to  $n=25$  at T2 (Table 4).

#### 30 31 32 Practice measures of safety

##### 33 34 35 *Staff perceptions of safety culture*

36  
37  
38 A total of  $n=57$  staff completed the MOS survey at T1, and  $n=61$  at T2. For the total sample there  
39  
40 was an increase in the mean percent positive score for the overall patient safety rating between T1  
41  
42 and T2, although not significant (72% to 74%,  $p=0.851$ ). For the majority of the patient safety culture  
43  
44 composites and the average across the ten composites there was a reduction in mean percent  
45  
46 positive scores, with only one significant reduction for the Teamwork composite between T1 and T2  
47  
48 (89% to 80%  $p=0.029$ ) (Appendix 3).

##### 49 50 51 52 *Safety incidents recorded on practice clinical risk management system*

53  
54  
55 Analysis of safety incidents recorded on practice's clinical risk management system revealed a  
56  
57 reduction in the number of incidents reported from T1 ( $n=32$ ) to T2 ( $n=21$ ) (Appendix 4). The  
58  
59  
60

1  
2  
3 incidents recorded on the practice clinical risk management system were different to the incidents  
4  
5 reported by patients on the PC PMOS.  
6  
7  
8  
9

## 10 11 **DISCUSSION**

12  
13  
14 This is the first reported patient feedback on safety intervention in Australian primary care. The  
15  
16 findings indicate that the intervention is feasible for scale-up to a larger effectiveness trial and  
17  
18 further spread into policy and practice. Staff deemed the intervention acceptable, with minor  
19  
20 recommendations for improvement. Intervention fidelity was high and implementation enablers  
21  
22 were attributed to the intervention structure and framework, use of intuitive problem solving  
23  
24 approaches, and multidisciplinary team involvement. Barriers to implementation reflected  
25  
26 previously reported problems undertaking quality improvement in primary care, such as lack of time  
27  
28 and staff, demanding priorities, power and team dynamics, and wider practice support and  
29  
30 engagement.<sup>25-27</sup> The process of systematically collecting patient safety data was achievable with  
31  
32 n=1750 patient surveys completed. The utility of the PC PMOS tool as a measure for safety was  
33  
34 demonstrated through the significant increase in mean scores for all practices from T1 to T2 (4.30 to  
35  
36 4.37, p=0.002).  
37  
38  
39

40  
41 It is widely acknowledged that patient feedback is rarely used for safety and quality improvement  
42  
43 purposes.<sup>38-46</sup> This study identified some enablers and barriers that impacted on the intervention  
44  
45 development and implementation including the team dynamic, improvement framework, and staff  
46  
47 attitude.  
48  
49

50  
51 A unique aspect of this patient feedback on safety intervention was the multidisciplinary dynamic of  
52  
53 the primary care teams, particularly administration staff leadership. This was considered a key  
54  
55 enabler to intervention adherence and acceptability. The safety interventions targeted the  
56  
57 contributing factors to safety incidents; as such, administration staff were ideally placed for  
58  
59  
60

1  
2  
3 intervention delivery. Administration staff transcended professional boundaries to generate  
4  
5 engagement and support, and implement changes at the latent end of the primary care system. In  
6  
7 this respect administration staff acted as change agents and innovators<sup>35 47 48</sup> and future safety  
8  
9 improvement work should consider their current underutilised role.  
10

11  
12 Although the Model for Improvement's Plan-Do-Study-Act cycle<sup>31</sup> is considered an effective,  
13  
14 adaptable and flexible framework for quality improvement in some contexts, practice staff in this  
15  
16 study identified it as a barrier to implementation. Formalising and documenting action plans in PDSA  
17  
18 cycles was often in disconnect to their natural problem solving approach and routine practice. In a  
19  
20 time, resource, and capacity scarce environment it is important that safety improvement  
21  
22 frameworks are simple, and easily integrate or mimic everyday work flow. There are several well  
23  
24 established quality improvement models<sup>49-51</sup> that could be utilised for this patient feedback on  
25  
26 safety intervention, however more research is needed to identify and investigate staff acceptability  
27  
28 and appropriateness of the different frameworks in this context.<sup>52</sup>  
29  
30  
31

32  
33 Staff attitude towards patient feedback on safety was similar to previous research, which reveals  
34  
35 staff difficulty to engage with or value patient feedback.<sup>36 38 41 42 45 53-56</sup> While staff described the value  
36  
37 and benefit of seeking patient feedback on safety, this was not entirely reflected in action plans or  
38  
39 translated during intervention implementation. More than half of the practice teams undertook  
40  
41 safety interventions that were a priority for staff rather than a priority for the patient.  
42  
43

44  
45 Recommendations to improve staff action on patient feedback could centre on providing staff with  
46  
47 structured and specific intervention examples that correspond to particular domains of safety on the  
48  
49 PC PMOS. Moreover, such intervention examples could have explicitly linked measures of safety to  
50  
51 each of the PC PMOS domains which may address the challenges staff experienced with creating  
52  
53 measures of change.<sup>57</sup>  
54

55  
56 The process of systematically collecting primary care safety data from the practice, staff and patients  
57  
58 was acceptable and feasible, yet some consideration is needed when determining appropriate  
59  
60

1  
2  
3 measures of intervention effectiveness in a larger trial. Data about patient safety in primary care in  
4 Australia is largely absent. Australia does not have a structured or connected reporting and learning  
5 system to understand the threats to patient safety, and there is no current systematic way to collect  
6 information about safety incidents or patient harm.<sup>58 59</sup> Using available sources of patient safety data  
7 in this study revealed some limitations; as such, objective measures of intervention effectiveness like  
8 statistical control charts<sup>60 61</sup>, PDSA cycle evaluation tools<sup>62 63</sup>, and record review<sup>64 65</sup> are  
9 recommended.

10  
11  
12 A limitation of this study was the sample. The practices were from one regional area, which may  
13 limit the generalisability of the findings. However, the diversity within the practices was considered  
14 adequate for this feasibility study. All practices had participated in one or more of the Australian  
15 Primary Care Collaborative Program<sup>66</sup> waves previously. Their commitment, interest, and  
16 understanding of safety and quality improvement processes was potentially already elevated prior  
17 to study commencement when compared with other practices. However, learning from high  
18 performers is advocated by many implementation science and quality improvement researchers.<sup>30 67</sup>  
19 High performing practices are considered ideal sources to understand when things go right in patient  
20 safety. The findings from this study contribute to the Safety II movement, and discourse about  
21 understanding how and why safety improvements occur in practice.<sup>68-72</sup> Results suggest the merit of  
22 conducting a larger scale effectiveness-implementation trial to determine the translatability of this  
23 intervention program and safety outcomes to primary care practices more generally.

## 24 25 26 27 28 29 30 31 32 33 34 35 36 37 38 39 40 41 42 43 44 45 46 47 **Conclusion**

48  
49  
50 This study's findings have demonstrated the feasibility of introducing an innovative patient feedback  
51 for safety improvement intervention in primary care, as well as contextual and intervention factors  
52 that promote safety improvement. The intervention complements existing safety improvement  
53 strategies and activities, and integrates into current patient feedback service requirements for  
54  
55  
56  
57  
58  
59  
60

1  
2  
3  
4  
5  
6  
7  
8  
9  
10  
11  
12  
13  
14  
15  
16  
17  
18  
19  
20  
21  
22  
23  
24  
25  
26  
27  
28  
29  
30  
31  
32  
33  
34  
35  
36  
37  
38  
39  
40  
41  
42  
43  
44  
45  
46  
47  
48  
49  
50  
51  
52  
53  
54  
55  
56  
57  
58  
59  
60

primary care. Further research is needed to examine the intervention effects on safety incident reduction.

For peer review only

## Acknowledgements

The authors acknowledge the practice staff and patients who participated in this study. The authors would also like to acknowledge the administrative support from Gillian Beard and Liz Jackway.

## Contributors

ALH conceived and designed the study, and was principal investigator for the study. SJG, KMN, KK, and VV contributed to the study design. ALH, SG and HB were responsible for the qualitative data analysis and manuscript preparation. VV was responsible for the quantitative data analysis and manuscript preparation. ALH created the first draft of the manuscript and was responsible for its revisions. SJG, HB, KMN, KK, MJB, and VV contributed to specific sections of the manuscript. All authors read and approved the final version of the manuscript.

## Funding

This work was supported by the Western Alliance Academic Health Science Centre (grant number WA-733721).

## Competing interests

None declared.

## Patient consent for publication

Not required.

## Data sharing statement

Data is available upon request to the authors

## Ethics approval

Ethics approval was granted by the Deakin University Human Ethics Advisory Group, Faculty of Health (HEAG-H 175\_2017).

**REFERENCES**

1. Severinsson IE, Holm AL. Patient's role in their own safety-a systematic review of patient involvement in safety. *Open Journal of Nursing* 2015;5:642-53.
2. Sutton E, Eborall H, Martin G. Patient Involvement in Patient Safety: Current experiences, insights from the wider literature, promising opportunities? *Public Management Review* 2014;17(1):72-89. doi: 10.1080/14719037.2014.881538
3. Hall J, Peat M, Birks Y, et al. Effectiveness of interventions designed to promote patient involvement to enhance safety: a systematic review. *Qual Saf Health Care* 2010;19(5):1-7.
4. World Health Organization. Patient Engagement: Technical Series on Safer Primary Care. Geneva: WHO, 2016.
5. Auraaen A, Slawomirski L, Klazinga N. The economics of patient safety in primary and ambulatory care: Flying blind. OECD Health Working Papers No 106. Directorate for Employment, Labour and Social Affairs, Health Division: Organisation for Economic Co-operation and Development, 2018.
6. Health Foundation. Involving patients in improving safety. London, UK: The Health Foundation, 2013.
7. Vincent C, Davis R. Patients and families as safety experts. *CMAJ* 2012;184(1):15-16.
8. Park M, Giap TTT. Patient and family engagement as a potential approach for improving patient safety: A systematic review. *J Adv Nurs* 2019
9. Berger Z, Flickinger TE, Pfoh E, et al. Promoting engagement by patients and families to reduce adverse events in acute care settings: a systematic review. *BMJ Qual Saf* 2014;23(7):548-55. doi: 10.1136/bmjqs-2012-001769
10. Birks Y, Hall J, McCaughan D, et al. Promoting patient involvement in safety initiatives. *Nurs Manag (Harrow)* 2011;18(1):16-20.
11. Lawton R, Armitage G. The role of the patient in clinical safety. London UK: Health Foundation, 2012.

- 1  
2  
3  
4  
5  
6  
7  
8  
9  
10  
11  
12  
13  
14  
15  
16  
17  
18  
19  
20  
21  
22  
23  
24  
25  
26  
27  
28  
29  
30  
31  
32  
33  
34  
35  
36  
37  
38  
39  
40  
41  
42  
43  
44  
45  
46  
47  
48  
49  
50  
51  
52  
53  
54  
55  
56  
57  
58  
59  
60
12. Lawton R, O'Hara JK, Sheard L, et al. Can patient involvement improve patient safety? A cluster randomised control trial of the Patient Reporting and Action for a Safe Environment (PRASE) intervention. *BMJ Qual Saf* 2017;26:622-31. doi: 10.1136/bmjqs-2016-005570
  13. Sahlström M, Partanen P, Turunen H. Patient-reported experiences of patient safety incidents need to be utilized more systematically in promoting safe care. *Int J Qual Health Care* 2018;30(10):778-85. doi: 10.1093/intqhc/mzy074
  14. Stocks SJ, Donnelly A, Esmail A, et al. Frequency and nature of potentially harmful preventable problems in primary care from the patient's perspective with clinician review: a population-level survey in Great Britain. *BMJ Open* 2018;8(6):e020952. doi: 10.1136/bmjopen-2017-020952
  15. Armitage G, Moore S, Reynolds C, et al. Patient-reported safety incidents as a new source of patient safety data: an exploratory comparative study in an acute hospital in England. *J Health Serv Res Policy* 2018;23(1):36-43. doi: 10.1177/1355819617727563
  16. O'Hara JK, Reynolds C, Moore S, et al. What can patients tell us about the quality and safety of hospital care? Findings from a UK multicentre survey study. *BMJ Qual Saf* 2018;27(9):673-82. doi: 10.1136/bmjqs-2017-006974
  17. O'Hara JK, Isden R. Identifying risks and monitoring safety: the role of patients and citizens. Thought paper: The Health Foundation, 2013.
  18. Giles SJ, Lawton RJ, Din I, et al. Developing a patient measure of safety (PMOS). *BMJ Qual Saf* 2013;22(7):554-62. doi: 10.1136/bmjqs-2012-000843
  19. Hernan A, Giles S, Fuller J, et al. Patient and carer identified factors which contribute to safety incidents in primary care: a qualitative study. *BMJ Qual Saf* 2015;24(9):583-93. doi: 10.1136/bmjqs-2015-004049
  20. Hernan AL, Giles SJ, O'Hara JK, et al. Developing a primary care patient measure of safety (PC PMOS): a modified Delphi process and face validity testing. *BMJ Qual Saf* 2016;25(4):273-80. doi: 10.1136/bmjqs-2015-004268



- 1  
2  
3 21. Hernan AL, Kloot K, Giles SJ, et al. Investigating the feasibility of a patient feedback tool to  
4  
5 improve safety in Australian primary care: a study protocol. *BMJ Open* 2019;9(5):e027327.  
6  
7 doi: 10.1136/bmjopen-2018-027327  
8  
9
- 10 22. Giles SJ, Parveen S, Hernan AL. Validation of the Primary Care Patient Measure of Safety (PC  
11  
12 PMOS) questionnaire. *BMJ Qual Saf* 2019;28(5):389-96. doi: 10.1136/bmjqs-2018-007988  
13  
14
- 15 23. Smith K, Baker K, Wesley D, et al. Guide to Improving Patient Safety in Primary Care Settings by  
16  
17 Engaging Patients and Families: Environmental Scan Report. Rockville, MD: Agency for  
18  
19 Healthcare Research and Quality, 2017.  
20
- 21 24. Braithwaite J. Changing how we think about healthcare improvement. *BMJ* 2018;361:k2014. doi:  
22  
23 10.1136/bmj.k2014  
24
- 25 25. Braithwaite J, Marks D, Taylor N. Harnessing implementation science to improve care quality and  
26  
27 patient safety: a systematic review of targeted literature. *Int J Qual Health Care*  
28  
29 2014;26(3):321-9. doi: 10.1093/intqhc/mzu047  
30  
31
- 32 26. Brennan SE, Bosch M, Buchan H, et al. Measuring organizational and individual factors thought to  
33  
34 influence the success of quality improvement in primary care: a systematic review of  
35  
36 instruments. *Implement Sci* 2012;7(1):121. doi: 10.1186/1748-5908-7-121  
37  
38
- 39 27. Kaplan HC, Provost LP, Froehle CM, et al. The Model for Understanding Success in Quality  
40  
41 (MUSIQ): building a theory of context in healthcare quality improvement. *BMJ Qual Saf*  
42  
43 2012;21(1):13-20. doi: 10.1136/bmjqs-2011-000010  
44  
45
- 46 28. Nilsen P, Bernhardsson S. Context matters in implementation science: a scoping review of  
47  
48 determinant frameworks that describe contextual determinants for implementation  
49  
50 outcomes. *BMC Health Serv Res* 2019;19(1):189.  
51
- 52 29. Greenhalgh T, Papoutsi C. Spreading and scaling up innovation and improvement. *BMJ*  
53  
54 2019;365:l2068. doi: 10.1136/bmj.l2068  
55  
56
- 57 30. Greenhalgh T, Papoutsi C. Studying complexity in health services research: desperately seeking  
58  
59 an overdue paradigm shift. *BMC Medicine* 2018;16(1):95. doi: 10.1186/s12916-018-1089-4  
60

- 1  
2  
3 31. Langley G, Moen R, Nolan K, et al. The improvement guide: a practical approach to enhancing  
4  
5 organizational performance: John Wiley & Sons 2009.  
6  
7  
8 32. Wright J, Lawton R, O'Hara J, et al. Chapter 6, Learning from error: a comparative study of  
9  
10 patient-reported patient safety incidents and existing sources of patient safety data.  
11  
12 Improving patient safety through the involvement of patients: development and evaluation  
13  
14 of novel interventions to engage patients in preventing patient safety incidents and  
15  
16 protecting them against unintended harm. Southampton (UK): NIHR Journals Library 2016.  
17  
18  
19 33. Agency for Healthcare Research and Quality. Medical Office Survey on patient safety culture.  
20  
21 Rockville, MD 2017.  
22  
23  
24 34. Tavory I, Timmermans S. Abductive analysis: Theorizing qualitative research: University of  
25  
26 Chicago Press 2014.  
27  
28 35. Sheard L, Marsh C, O'Hara J, et al. Exploring how ward staff engage with the implementation of a  
29  
30 patient safety intervention: a UK-based qualitative process evaluation. *BMJ Open* 2017;7(7)  
31  
32 doi: 10.1136/bmjopen-2016-014558  
33  
34  
35 36. Sheard L, Marsh C, O'Hara J, et al. The Patient Feedback Response Framework – Understanding  
36  
37 why UK hospital staff find it difficult to make improvements based on patient feedback: A  
38  
39 qualitative study. *Soc Sci Med* 2017;178:19-27. doi: 10.1016/j.socscimed.2017.02.005  
40  
41  
42 37. Carroll C, Patterson M, Wood S, et al. A conceptual framework for implementation fidelity.  
43  
44 *Implement Sci* 2007;2(1):40. doi: 10.1186/1748-5908-2-40  
45  
46  
47 38. Baldie DJ, Guthrie B, Entwistle V, et al. Exploring the impact and use of patients' feedback about  
48  
49 their care experiences in general practice settings—a realist synthesis. *Fam Pract*  
50  
51 2017;35(1):13-21. doi: 10.1093/fampra/cmz067  
52  
53  
54 39. Sheard L, Peacock R, Marsh C, et al. What's the problem with patient experience feedback? A  
55  
56 macro and micro understanding, based on findings from a three-site UK qualitative study.  
57  
58 *Health Expect* 2019;22(1):46-53. doi: 10.1111/hex.12829  
59  
60

- 1  
2  
3 40. de Vos MS, Hamming JF, Marang-van de Mheen PJ. The problem with using patient complaints  
4  
5 for improvement. *BMJ Qual Saf* 2018;27(9):758-62. doi: 10.1136/bmjqs-2017-007463  
6  
7  
8 41. Flott KM, Graham C, Darzi A, et al. Can we use patient-reported feedback to drive change? The  
9  
10 challenges of using patient-reported feedback and how they might be addressed. *BMJ Qual*  
11  
12 *Saf* 2017;26(6):502-07. doi: 10.1136/bmjqs-2016-005223  
13  
14 42. Boiko O, Campbell JL, Elmore N, et al. The role of patient experience surveys in quality assurance  
15  
16 and improvement: a focus group study in English general practice. *Health Expect*  
17  
18 2015;18(6):1982-94. doi: 10.1111/hex.12298  
19  
20 43. Gardner K, Parkinson A, Banfield M, et al. Usability of patient experience surveys in Australian  
21  
22 primary health care: a scoping review. *Aust J Prim Health* 2016;22(2):93-99. doi:  
23  
24 10.1071/PY14179  
25  
26 44. Davies E, Cleary PD. Hearing the patient's voice? Factors affecting the use of patient survey data  
27  
28 in quality improvement. *Qual Saf Health Care* 2005;14(6):428-32. doi:  
29  
30 10.1136/qshc.2004.012955  
31  
32 45. Greenhalgh J, Dalkin S, Gooding K, et al. Functionality and feedback: a realist synthesis of the  
33  
34 collation, interpretation and utilisation of patient-reported outcome measures data to  
35  
36 improve patient care. Southampton (UK): NIHR Journals Library 2017.  
37  
38  
39 46. Gleeson H, Calderon A, Swami V, et al. Systematic review of approaches to using patient  
40  
41 experience data for quality improvement in healthcare settings. *BMJ Open*  
42  
43 2016;6(8):e011907. doi: 10.1136/bmjopen-2016-011907  
44  
45  
46 47. Greenhalgh T. Role of routines in collaborative work in healthcare organisations. *BMJ*  
47  
48 2008;337:a2448. doi: 10.1136/bmj.a2448  
49  
50  
51 48. Lucas B, Nacer H. The habits of an improver: thinking about learning for improvement in  
52  
53 healthcare. London: The Health Foundation, 2015.  
54  
55  
56 49. Toussaint JS, Berry LL. The Promise of Lean in Health Care. *Mayo Clin Proc* 2013;88(1):74-82. doi:  
57  
58 10.1016/j.mayocp.2012.07.025  
59  
60

- 1  
2  
3 50. Schroeder RG, Linderman K, Liedtke C, et al. Six Sigma: Definition and underlying theory. *Journal*  
4  
5 *of Operations Management* 2008;26(4):536-54. doi: 10.1016/j.jom.2007.06.007  
6  
7  
8 51. Brannan KM. Total quality in health care. *Hosp Mater Manage Q* 1998;19(4):1-8.  
9  
10 52. Johnson A, Clay-Williams R, Lane P. Framework for better care: reconciling approaches to patient  
11  
12 safety and quality. *Aust Health Rev* 2019;43(6):653-55. doi: 10.1071/AH18050  
13  
14 53. Burt J, Campbell J, Abel G, et al. Programme Grants for Applied Research. Improving patient  
15  
16 experience in primary care: a multimethod programme of research on the measurement and  
17  
18 improvement of patient experience. Southampton (UK): NIHR Journals Library 2017.  
19  
20 54. Wensing M, Vingerhoets E, Grol R. Feedback based on patient evaluations: a tool for quality  
21  
22 improvement? *Patient Educ Couns* 2003;51(2):149-53. doi: 10.1016/S0738-3991(02)00199-4  
23  
24  
25 55. Farrington C, Burt J, Boiko O, et al. Doctors' engagements with patient experience surveys in  
26  
27 primary and secondary care: a qualitative study. *Health Expect* 2017;20(3):385-94. doi:  
28  
29 10.1111/hex.12465  
30  
31 56. Asprey A, Campbell JL, Newbould J, et al. Challenges to the credibility of patient feedback in  
32  
33 primary healthcare settings: a qualitative study. *Br J Gen Pract* 2013;63(608):e200-e08. doi:  
34  
35 10.3399/bjgp13X664252  
36  
37  
38 57. Woodcock T, Liberati EG, Dixon-Woods M. A mixed-methods study of challenges experienced by  
39  
40 clinical teams in measuring improvement. *BMJ Qual Saf* 2019 doi: 10.1136/bmjqs-2018-  
41  
42 009048  
43  
44  
45 58. Russell LM, Dawda P. Patient safety in primary care: more data and more action needed. *MJA*  
46  
47 2015;202(2):72-3. doi: 10.5694/mja14.00964  
48  
49  
50 59. Makeham M. Primary health networks - a new home for patient safety in primary care? *Health*  
51  
52 *Voices* 2015;16:19-20.  
53  
54  
55 60. Benneyan JC, Lloyd RC, Plsek PE. Statistical process control as a tool for research and healthcare  
56  
57 improvement. *Qual Saf Health Care* 2003;12(6):458-64. doi: 10.1136/qhc.12.6.458  
58  
59  
60

- 1  
2  
3 61. Fretheim A, Tomic O. Statistical process control and interrupted time series: a golden  
4  
5 opportunity for impact evaluation in quality improvement. *BMJ Qual Saf* 2015;24(12):748-  
6  
7 52. doi: 10.1136/bmjqs-2014-003756  
8  
9  
10 62. Poots AJ, Reed JE, Woodcock T, et al. How to attribute causality in quality improvement: lessons  
11  
12 from epidemiology. *BMJ Qual Saf* 2017;26(11):933-37. doi: 10.1136/bmjqs-2017-006756  
13  
14 63. McNicholas C, Lennox L, Woodcock T, et al. Evolving quality improvement support strategies to  
15  
16 improve Plan–Do–Study–Act cycle fidelity: a retrospective mixed-methods study. *BMJ Qual*  
17  
18 *Saf* 2019;28(5):356-65.  
19  
20 64. Esmail A. Measuring and monitoring safety: a primary care perspective. Thought paper. London:  
21  
22 The Health Foundation, 2013.  
23  
24 65. Hanskamp-Sebregts M, Zegers M, Vincent C, et al. Measurement of patient safety: a systematic  
25  
26 review of the reliability and validity of adverse event detection with record review. *BMJ*  
27  
28 *Open* 2016;6(8):e011078. doi: 10.1136/bmjopen-2016-011078  
29  
30 66. Knight AW, Caesar C, Ford D, et al. Improving primary care in Australia through the Australian  
31  
32 Primary Care Collaboratives Program: a quality improvement report. *BMJ Qual Saf* 2012 doi:  
33  
34 10.1136/bmjqs-2011-000165  
35  
36 67. Braithwaite JJ, Churruca K, Ellis LA, et al. Complexity Science in Healthcare Aspirations,  
37  
38 Approaches, Applications and Accomplishments : A White Paper. Sydney, Australia:  
39  
40 Australian Institute of Health Innovation, Macquarie University, 2017.  
41  
42 68. Braithwaite J, Wears RL, Hollnagel E. Resilient health care: turning patient safety on its head†. *Int*  
43  
44 *J Qual Health Care* 2015;27(5):418-20. doi: 10.1093/intqhc/mzv063  
45  
46 69. Lawton R, Taylor N, Clay-Williams R, et al. Positive deviance: a different approach to achieving  
47  
48 patient safety. *BMJ Qual Saf* 2014;23(11):880-83. doi: 10.1136/bmjqs-2014-003115  
49  
50 70. Ellis LA, Churruca K, Clay-Williams R, et al. Patterns of resilience: A scoping review and  
51  
52 bibliometric analysis of resilient health care. *Saf Sci* 2019;118:241-57. doi:  
53  
54 10.1016/j.ssci.2019.04.044  
55  
56  
57  
58  
59  
60

- 1  
2  
3 71. McNab D, Bowie P, Morrison J, et al. Understanding patient safety performance and educational  
4 needs using the 'Safety-II' approach for complex systems. *Educ Prim Care* 2016;27(6):443-50.  
5  
6 doi: 10.1080/14739879.2016.1246068  
7  
8  
9  
10 72. Hollnagel E. Safety-I and safety-II: the past and future of safety management. Boca Raton, FL CRC  
11 press 2014.  
12  
13  
14 73. Carson-Stevens A, Hibbert P, Williams H, et al. Characterising the nature of primary care patient  
15 safety incident reports in the England and Wales National Reporting and Learning System: a  
16 mixed-methods agenda-setting study for general practice. Southampton (UK): NIHR Journals  
17 Library 2016.  
18  
19  
20  
21  
22  
23  
24  
25  
26  
27  
28  
29  
30  
31  
32  
33  
34  
35  
36  
37  
38  
39  
40  
41  
42  
43  
44  
45  
46  
47  
48  
49  
50  
51  
52  
53  
54  
55  
56  
57  
58  
59  
60

**Table 1. Key participant quotes corresponding to feasibility measures**

| Feasibility measure | Theme                                       | Sub-theme                                                                      | Participant quote                                                                                                                                                                                                                                                                                                                                                                                                             |
|---------------------|---------------------------------------------|--------------------------------------------------------------------------------|-------------------------------------------------------------------------------------------------------------------------------------------------------------------------------------------------------------------------------------------------------------------------------------------------------------------------------------------------------------------------------------------------------------------------------|
| Acceptability       | Attitude towards patient feedback on safety | Value patient feedback on safety                                               | <p>"It's always, the valuable ones are always the awful ones, aren't they? You know... it's really precious. Ain't often people are honest like that..." (GP, Practice D, APM)</p> <p>"It's better to be informed about it so that you can make that change...it makes it more positive for everybody then"...(Administration Staff, Practice E, APM)</p>                                                                     |
|                     |                                             | Patient feedback on safety aligned with staff awareness of issues              | "the bits that were flagged that were in there [feedback report] were probably what we expected ..." (PN, Practice D, APM).                                                                                                                                                                                                                                                                                                   |
|                     |                                             | Believability of the feedback                                                  | "And I accept the [safety incident] one, because, perception is truth." (GP, Practice B, APM).                                                                                                                                                                                                                                                                                                                                |
|                     |                                             | Concern and empathy towards patient feedback                                   | <p>"... there's one [safety incident] I was actually concerned, there's a patient who obviously feels that we haven't done our best by them." (PM, Practice A, APM).</p> <p>"So someone had a blocked airway. That sounds really terrible, doesn't it? It's [an] emergency." (PN, Practice A, APM).</p>                                                                                                                       |
|                     |                                             | Surprised or unsure how to respond when feedback differed to staff perceptions | <p>"I thought we have got some more negative feedback from people, which surprised me." (PN1, Practice C, APM).</p> <p>"But I'm not quite sure about that [safety incident] one... I found that one very odd, because... probably some of the best staff we have are down that end of the building, without being horrible to others, but the doctors even say that. I just find that really odd." (PM, Practice B, APM).</p> |
|                     |                                             | Dismissive towards patient feedback                                            | "I think sometimes it's that lack of understanding, that they [GP] can't come and fix the world in fifteen minutes" (PN1, Practice C, APM).                                                                                                                                                                                                                                                                                   |

| Feasibility measure                                                  | Theme                                  | Sub-theme                                                                        | Participant quote                                                                                                                                                                                                                                                                                                                                                                                                                                                                                                |
|----------------------------------------------------------------------|----------------------------------------|----------------------------------------------------------------------------------|------------------------------------------------------------------------------------------------------------------------------------------------------------------------------------------------------------------------------------------------------------------------------------------------------------------------------------------------------------------------------------------------------------------------------------------------------------------------------------------------------------------|
|                                                                      | Using patient feedback to make changes |                                                                                  | “when you get that: ‘I can’t see the doctor that I want to see’ [patient comment]. Well we’ve been working on this for five years trying to improve things!” (PM, Practice D, Final Interview)                                                                                                                                                                                                                                                                                                                   |
|                                                                      |                                        | Cautious about using patient feedback for safety improvement                     | “But we need to... you know, decide on what, what we think's important to change... and what's changeable. And I don't think we can do anything about this [safety incident].” (GP, Practice A, APM)                                                                                                                                                                                                                                                                                                             |
|                                                                      |                                        | Largely positive feedback limited staff response                                 | “We didn’t have too many negatives [feedback] which is a good thing but also, it was sort of, well do we need to change that much?” (PM, Practice A, Final interview)                                                                                                                                                                                                                                                                                                                                            |
|                                                                      |                                        | Using staff identified areas of service improvement rather than patient feedback | “...even though it's not, it's not showing up as negative as I thought it might've, so I was really happy about that, but I think the appointment system will still [need to be addressed]... And I think that will assist the, there's less likely to be an error. So there's less likely to be a, ah, negative outcome for the patient” (PM, Practice A, APM).                                                                                                                                                 |
| Barriers and enablers to intervention development and implementation | Developing interventions               | Intuitive problem solving process                                                | <p>“We're probably doing it anyway, but we don't realize it's a model for improvement.” (PN2, Practice C, Final interview)</p> <p>“So we [other administration staff] we probably collaborate a lot. We throw ideas around. You know how to do different things. So we're probably the thinkers.” (Admin, Practice F, Final interview)</p>                                                                                                                                                                       |
|                                                                      |                                        | Disconnect between staff problem solving process and Mfl framework               | <p>“It was a good framework. Initially, what we found was when barriers kind of ah developed, we had trouble readjusting to that [Mfl framework].” (GP, Practice F, Final interview)</p> <p>“I didn't ever use a model I was just sort of like, “This is what I'm trying to achieve. This is how I'm going to do it”... Did it work? Didn't it work? Which is probably the same model, but I just didn't actually outline it or ever document it. It was just in my head.” (PN, Practice D, Final Interview)</p> |



| Feasibility measure  | Theme                                                                                                                                                                                       | Sub-theme                                                                                                                                                                                      | Participant quote                                                                                                                                                                                                                                                                                                                                                                                                                                                                                         |
|----------------------|---------------------------------------------------------------------------------------------------------------------------------------------------------------------------------------------|------------------------------------------------------------------------------------------------------------------------------------------------------------------------------------------------|-----------------------------------------------------------------------------------------------------------------------------------------------------------------------------------------------------------------------------------------------------------------------------------------------------------------------------------------------------------------------------------------------------------------------------------------------------------------------------------------------------------|
|                      |                                                                                                                                                                                             |                                                                                                                                                                                                | <p>“We are not very keen of formally doing that [sic.] things [MFI]. The simple the better.” (GP, Practice E, Final Interview)</p> <p>“...we probably were never really good at documenting that stuff. Document ... as I said, in here you're kind of doing things on the run, do you know what I mean? You go, "Oh yeah, we'll do that."” (PM, Practice E, Final Interview)</p>                                                                                                                         |
|                      |                                                                                                                                                                                             | Integrating and adapting problem solving approaches                                                                                                                                            | <p>“[The model for improvement] is a good process and it's simple but sometimes we complicate it by making it bigger than what it is” (PN1, Practice C, Final Interview).</p> <p>“ ... [we] do the PDSA cycle, not necessarily super formally but we just, we identify what needs to be done and we try to make our changes small not big and then we introduce those to the practice or to specific members of the practice team who might need to know about it.” (GP, Practice A, Final Interview)</p> |
|                      | Implementing interventions                                                                                                                                                                  | Multidisciplinary team                                                                                                                                                                         | <p>“I just figured that it would end up falling probably on the three of us [PM, PN, Admin]. Because I knew [GP] was going to be time poor... So he was there if we needed him and we would bug him.’ (PM, Practice B, Final Interview)</p>                                                                                                                                                                                                                                                               |
|                      | Staff responsibility and ownership for intervention linked to type of improvement activity                                                                                                  | <p>“I like data. I like playing with data [laughter]. I enjoyed doing a lot of the collection and stuff and seeing what you can do to make it happen...” (PM, Practice C, Final Interview)</p> |                                                                                                                                                                                                                                                                                                                                                                                                                                                                                                           |
|                      | Difficulty in measuring change in safety outcomes                                                                                                                                           | <p>‘It is difficult to measure outcome because if you prevent a complication, it [is] what it is’ (GP, Practice E, Workshop 2)</p>                                                             |                                                                                                                                                                                                                                                                                                                                                                                                                                                                                                           |
| Use of soft measures | <p>“...because there were things that we couldn't really kind of quantify. I mean, how do you quantify [staff member] stress level based on one particular aspect and you know separate</p> |                                                                                                                                                                                                |                                                                                                                                                                                                                                                                                                                                                                                                                                                                                                           |

| Feasibility measure | Theme | Sub-theme                                             | Participant quote                                                                                                                                                                                                                                                                                                                                                                                                                                                                                                                                                                                                                 |
|---------------------|-------|-------------------------------------------------------|-----------------------------------------------------------------------------------------------------------------------------------------------------------------------------------------------------------------------------------------------------------------------------------------------------------------------------------------------------------------------------------------------------------------------------------------------------------------------------------------------------------------------------------------------------------------------------------------------------------------------------------|
|                     |       |                                                       | it from...? That was what we had trouble with, more than anything.” (GP, Practice F, Final Interview)                                                                                                                                                                                                                                                                                                                                                                                                                                                                                                                             |
|                     |       | Staff support and engagement                          | “Nobody wanted to be part of the safety improvement team, like, as soon as [you] mention anything like this, everyone’s just like [pause] ‘Not again’.” (PM, Practice D, Workshop 2).                                                                                                                                                                                                                                                                                                                                                                                                                                             |
|                     |       | Time and resources                                    | <p>“I felt as though we could have actually used a, ‘Alright, what's going wrong? Let's troubleshoot this and see.’ I don't think as a team, we were able to devote the time or the resources or energy to actually do that when we hit those barriers.” (GP, Practice F, Final Interview)</p> <p>‘A lot's changed in the practice since we [started the trial]. A lot of fairly massive things. We've taken on 50% more students, we've got a few more extra learners, we've got a few other things going on plus we've had just some stuff, health issues, which have had a huge impact.’ (GP, Practice A, Final Interview)</p> |
| Trail scalability   |       | Increased facilitation and support from research team | <p>“I think the workshops were valuable. I don't know whether we can just blame the [intervention barriers], I suppose our lack of engagement with [the intervention]. Maybe if we had to engage a little bit more, it probably would have kept us on track a bit more I think... even if it was just on the phone or something.” (PM, Practice D, Final Interview)</p> <p>“I think you need somebody that's there as the overseer to keep us on track.” (PM, Practice B, Final interview).</p>                                                                                                                                   |
|                     |       | Real-time electronic patient feedback processes       | “Something electronic I think we’d definitely be interested in. Even things, like the emails and text messages and stuff to people after they've been to their appointment, people don't have to do them then and there. They can sit on their couch at home and do it at night when they've actually got time... I would imagine we would get different feedback if patients were being surveyed after their appointment.” (PM, Practice D, Final interview).                                                                                                                                                                    |

1  
2  
3  
4  
5  
6  
7  
8  
9  
10  
11  
12  
13  
14  
15  
16  
17  
18  
19  
20  
21  
22  
23  
24  
25  
26  
27  
28  
29  
30  
31  
32  
33  
34  
35  
36  
37  
38  
39  
40  
41  
42  
43  
44  
45  
46

PM: Practice Manager

PN: Practice Nurse

GP: General Practitioner

APM: Action Planning Meeting

Workshop 2: Participant recording during discussions from Workshop 2

MFI: Model for Improvement

For peer review only

**Table 2. Patient demographic characteristics**

|                                                     | Practice A |    | Practice B |            | Practice C |           | Practice D |            | Practice E |            | Practice F |            | Total      |             |
|-----------------------------------------------------|------------|----|------------|------------|------------|-----------|------------|------------|------------|------------|------------|------------|------------|-------------|
|                                                     | T1         | T2 | T1         | T2         | T1         | T2        | T1         | T2         | T1         | T2         | T1         | T2         | T1         | T2          |
| Gender (n)                                          | 99         | -  | 195        | 197        | 141        | 150       | 128        | 142        | 146        | 155        | 113        | 257        | 822        | 901         |
| Male (n, %)                                         | 24 (24.2)  | -  | 48 (24.6)  | 62 (31.5)  | 67 (47.5)  | 71 (47.3) | 24 (18.8)  | 29 (20.4)  | 43 (29.5)  | 51 (32.9)  | 35 (31.0)  | 97 (37.7)  | 241 (29.3) | 310 (35.4)* |
| Female (n, %)                                       | 75 (75.8)  | -  | 147 (75.4) | 135 (68.5) | 74 (52.5)  | 79 (52.7) | 104 (81.3) | 113 (79.6) | 103 (70.5) | 104 (67.1) | 78 (69.0)  | 160 (62.3) | 581 (70.7) | 591 (65.6)  |
| Age (mean, SD)                                      | 53 (17.2)  | -  | 55 (17.2)  | 55 (18.4)  | 63 (16.8)  | 61 (17.7) | 47 (17.7)  | 50 (18.6)  | 57 (18.9)  | 59 (18.1)  | 55 (17.4)  | 54 (17.7)  | 55 (18.1)  | 56 (18.3)   |
| Visits to practice in previous 12 months (mean, SD) | 13 (15.9)  | -  | 7 (5.9)    | 8 (5.9)*   | 7 (5.8)    | 8 (11.0)  | 8 (9.4)    | 9 (9.3)    | 7 (6.1)    | 8 (10.1)   | 8 (5.7)    | 8 (7.8)    | 8 (8.5)    | 8 (8.7)     |

\* Statistically significant difference between baseline and 6 months  $p < 0.05$

T1= Time 1 (Baseline)

T2 = Time 2 (6 months post intervention period)

**Table 3. PC PMOS overall and domain specific scores by practice**

|                                          | Practice A     |    | Practice B     |                   | Practice C     |                  | Practice D     |                | Practice E     |                  | Practice F     |                  | Total          |                   |
|------------------------------------------|----------------|----|----------------|-------------------|----------------|------------------|----------------|----------------|----------------|------------------|----------------|------------------|----------------|-------------------|
|                                          | T1             | T2 | T1             | T2                | T1             | T2               | T1             | T2             | T1             | T2               | T1             | T2               | T1             | T2                |
| PC PMOS mean score (SD)                  | 4.22<br>(0.67) | -  | 4.29<br>(0.46) | 4.46 **<br>(0.40) | 4.26<br>(0.50) | 4.36<br>(0.46)   | 4.44<br>(0.42) | 4.47<br>(0.44) | 4.24<br>(0.49) | 4.26<br>(0.49)   | 4.36<br>(0.40) | 4.32<br>(0.52)   | 4.30<br>(0.49) | 4.37 *<br>(0.47)  |
| Access Mean (SD)                         | 3.94<br>(0.84) | -  | 4.12<br>(0.64) | 4.38 **<br>(0.60) | 4.03<br>(0.67) | 4.26 *<br>(0.67) | 4.24<br>(0.71) | 4.29<br>(0.67) | 4.01<br>(0.76) | 4.07<br>(0.75)   | 4.16<br>(0.68) | 4.15<br>(0.76)   | 4.09<br>(0.71) | 4.23 **<br>(0.70) |
| Communication Mean (SD)                  | 4.37<br>(0.64) | -  | 4.41<br>(0.50) | 4.56 *<br>(0.47)  | 4.40<br>(0.52) | 4.47<br>(0.56)   | 4.60<br>(0.45) | 4.60<br>(0.47) | 4.37<br>(0.57) | 4.44<br>(0.53)   | 4.51<br>(0.46) | 4.45<br>(0.58)   | 4.44<br>(0.53) | 4.50 *<br>(0.53)  |
| External policy environment Mean (SD)    | 4.18<br>(0.82) | -  | 4.00<br>(0.88) | 4.16<br>(0.90)    | 4.05<br>(0.97) | 4.08<br>(1.04)   | 4.07<br>(1.08) | 4.20<br>(1.00) | 3.97<br>(0.94) | 3.90<br>(1.01)   | 3.94<br>(1.05) | 4.09<br>(1.03)   | 4.03<br>(0.96) | 4.09<br>(1.00)    |
| Information flow Mean (SD)               | 4.18<br>(0.68) | -  | 4.27<br>(0.63) | 4.46 *<br>(0.56)  | 4.26<br>(0.58) | 4.42 *<br>(0.59) | 4.42<br>(0.61) | 4.41<br>(0.68) | 4.18<br>(0.67) | 4.29<br>(0.61)   | 4.31<br>(0.61) | 4.25<br>(0.68)   | 4.27<br>(0.63) | 4.36 *<br>(0.63)  |
| Organisation and care planning Mean (SD) | 4.37<br>(0.55) | -  | 4.27<br>(0.61) | 4.47 *<br>(0.62)  | 4.36<br>(0.56) | 4.37<br>(0.57)   | 4.36<br>(0.54) | 4.44<br>(0.49) | 4.29<br>(0.53) | 4.30<br>(0.66)   | 4.45<br>(0.56) | 4.36<br>(0.65)   | 4.34<br>(0.56) | 4.39<br>(0.61)    |
| Patient related factors Mean (SD)        | 4.45<br>(0.78) | -  | 4.45<br>(0.65) | 4.69 **<br>(0.54) | 4.49<br>(0.70) | 4.56<br>(0.71)   | 4.63<br>(0.60) | 4.75<br>(0.53) | 4.48<br>(0.58) | 4.51<br>(0.73)   | 4.60<br>(0.57) | 4.57<br>(0.65)   | 4.51<br>(0.65) | 4.61 *<br>(0.64)  |
| Physical environment Mean (SD)           | 4.47<br>(0.69) | -  | 4.48<br>(0.53) | 4.65 *<br>(0.49)  | 4.58<br>(0.55) | 4.57<br>(0.58)   | 4.60<br>(0.51) | 4.63<br>(0.58) | 4.47<br>(0.59) | 4.50<br>(0.60)   | 4.64<br>(0.48) | 4.47 *<br>(0.66) | 4.54<br>(0.56) | 4.56<br>(0.59)    |
| Referral systems Mean (SD)               | 4.38<br>(0.6)  | -  | 4.37<br>(0.56) | 4.53 *<br>(0.54)  | 4.34<br>(0.57) | 4.41<br>(0.59)   | 4.59<br>(0.54) | 4.60<br>(0.55) | 4.41<br>(0.49) | 4.45<br>(0.56)   | 4.48<br>(0.53) | 4.43<br>(0.65)   | 4.42<br>(0.55) | 4.48<br>(0.59)    |
| Task performance Mean (SD)               | 4.04<br>(0.93) | -  | 4.10<br>(0.96) | 4.10<br>(1.17)    | 4.00<br>(0.99) | 4.01<br>(1.12)   | 4.36<br>(0.84) | 4.20<br>(0.95) | 3.97<br>(0.97) | 3.70 *<br>(1.15) | 3.85<br>(1.11) | 4.02<br>(0.94)   | 4.06<br>(0.98) | 4.01<br>(1.07)    |

T1= Time 1 (Baseline)

T2 = Time 2 (6 months post intervention period)

\* p&lt;0.005

\*\* p&lt;0.001

**Table 4. Frequency, preventability and severity of patient-reported incidents and concerns**

|                                                                                        | Practice A             |    | Practice B               |    | Practice C                                   |                                  | Practice D |    | Practice E             |                      | Practice F             |                        | Total                  |                      |
|----------------------------------------------------------------------------------------|------------------------|----|--------------------------|----|----------------------------------------------|----------------------------------|------------|----|------------------------|----------------------|------------------------|------------------------|------------------------|----------------------|
|                                                                                        | T1                     | T2 | T1                       | T2 | T1                                           | T2                               | T1         | T2 | T1                     | T2                   | T1                     | T2                     | T1                     | T2                   |
| No. of patient reported incidents <sup>†</sup>                                         | 1                      | -  | 4                        | 0  | 2                                            | 2                                | 0          | 0  | 3                      | 3                    | 1                      | 4                      | 11                     | 9                    |
| Average preventability rating (range) <sup>‡</sup>                                     | Definitely preventable | -  | Probably not preventable | -  | Definitely preventable, Probably preventable | Probably preventable, Don't know | -          | -  | Definitely preventable | Probably preventable | Definitely preventable | Definitely preventable | Definitely preventable | Probably preventable |
| Average severity rating (range) <sup>^</sup>                                           | 10 (10)                | -  | 7.3 (6-8)                | -  | 6.5 (3-10)                                   | 8.5 (7-10)                       | -          | -  | 6.7 (6-8)              | 6.3 (6-7)            | 9 (9)                  | 7.6 (7-9)              | 7.4 (3-10)             | 7.4 (6-10)           |
| No. of patient reported concerns <sup>#</sup>                                          | 6                      | -  | 13                       | 6  | 9                                            | 3                                | 2          | 2  | 8                      | 6                    | 4                      | 8                      | 42                     | 25                   |
| No. of patient reported concerns that were classified as safety incidents <sup>~</sup> | 3                      | -  | 7                        | 3  | 1                                            | 1                                | 1          | 2  | 3                      | 3                    | 2                      | 3                      | 17                     | 12                   |

<sup>†</sup> Patient reported incidents using Patient Incident Reporting Tool

<sup>‡</sup> Preventability scale consists of five options 'Definitely preventable', 'Probably preventable', 'Probably not preventable', 'Definitely not preventable', and 'Don't know'. Expressed as the median due to it being an ordinal variable.

<sup>^</sup> Patient-rated severity scale is 1-10 with 1=not serious at all and 10=extremely serious.

<sup>#</sup> Patient reported concerns mentioned in 'other comments' section of the survey (total number of negative comments)

<sup>~</sup> Patient reported incidents mentioned in the 'other comments' section of the survey (PISA classification system was used to classify safety incidents<sup>73</sup>)

T1= Time 1 (Baseline)

T2 = Time 2 (6 months post intervention period)

**Box 1. Recommendations for intervention improvement**

- Simplification of intervention framework
- Structured and defined intervention actions plans and corresponding safety measures for each of the PC PMOS domains of safety
- Electronic data collection platforms to enable real-time patient feedback
- Increased external intervention facilitation
- Modification to questionnaire collecting patient reported safety incidents

peer review only

Figure 1. Intervention phases

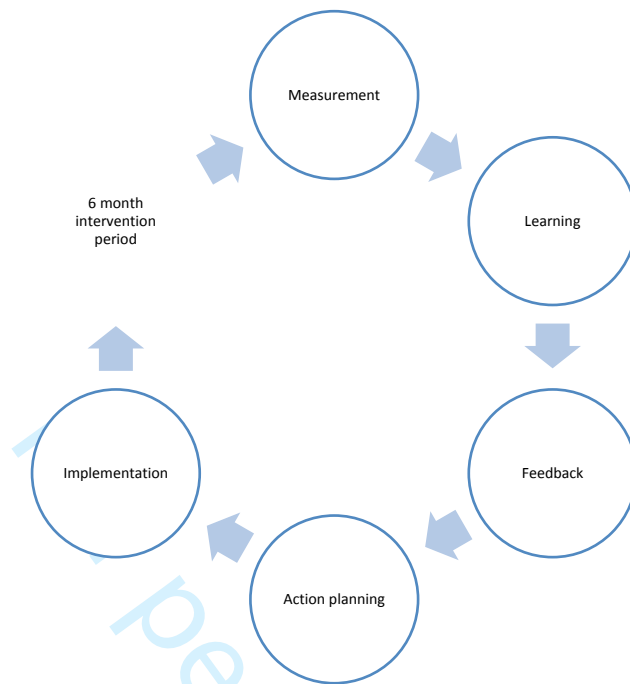

1  
2  
3  
4  
5  
6  
7  
8  
9  
10  
11  
12  
13  
14  
15  
16  
17  
18  
19  
20  
21  
22  
23  
24  
25  
26  
27  
28  
29  
30  
31  
32  
33  
34  
35  
36  
37  
38  
39  
40  
41  
42  
43  
44  
45  
46  
47  
48  
49  
50  
51  
52  
53  
54  
55  
56  
57  
58  
59  
60



## Appendix 1. Practice profile summary

|                                      | Practice A      | Practice B      | Practice C      | Practice D   | Practice E             | Practice F |
|--------------------------------------|-----------------|-----------------|-----------------|--------------|------------------------|------------|
| Estimated number of unique patients  | 9106            | 12000           | N/A             | 7232         | 3200                   | 21725      |
| Estimated patient gender (%)         |                 |                 |                 |              |                        |            |
| Male                                 | 40.79           | 45              | 50              | 47.91        | 45                     | 46         |
| Female                               | 54.5            | 55              | 50              | 50.28        | 55                     | 54         |
| Other or not recorded                | 4.71            | 0               | 0               | 1.8          | 0                      | 0          |
| Estimated age distribution (%)       |                 |                 |                 |              |                        |            |
| Birth – 10 years                     | 10.1            | 9               | 8.58            | 13.7         | 8.1                    | 11         |
| 11 – 18 years                        | 8.2             | 6               | 8.30            | 9.9          | 10.7                   | 13         |
| 19 – 45 years                        | 34.3            | 26              | 24.02           | 35.8         | 25.7                   | 32         |
| 46 – 64 years                        | 26.9            | 29              | 27.36           | 24.1         | 31.7                   | 27         |
| 65 – 79 years                        | 15.2            | 21              | 22.13           | 11.9         | 17.1                   | 11         |
| 80+ years                            | 5.3             | 9               | 9.60            | 4.6          | 6.3                    | 6          |
| Number of patients seen per week     | N/A             | 850             | 271             | 326          | 245                    | 1408       |
| Number of patients seen per month    | N/A             | 3624            | 1084            | 1030         | N/A                    | 5471       |
| Number of new patients last month    | N/A             | 69              | 50              | 58           | N/A                    | 180        |
| Number of consultations per week     | 576             | 1584            | 454             | 393          | 245                    | 1260       |
| Number of consultations per month    | 2148            | 5832            | 1816            | 1809         | N/A                    | 5216       |
| Top 5 patient diagnosis / conditions | Mental health   | Hypertension    | Hypertension    | Hypertension | Diabetes               | Obesity    |
|                                      | Musculoskeletal | Hyperlipidaemia | Hyperlipidaemia | Asthma       | Ischemic heart disease | Diabetes   |

|                                                          | Practice A                                                                                                               | Practice B                                                                                                                              | Practice C                                                                                                                                            | Practice D                                                                  | Practice E                                                                               | Practice F                                                       |
|----------------------------------------------------------|--------------------------------------------------------------------------------------------------------------------------|-----------------------------------------------------------------------------------------------------------------------------------------|-------------------------------------------------------------------------------------------------------------------------------------------------------|-----------------------------------------------------------------------------|------------------------------------------------------------------------------------------|------------------------------------------------------------------|
|                                                          | Skin problems                                                                                                            | Asthma                                                                                                                                  | Osteoarthritis                                                                                                                                        | Depression                                                                  | Hypertension                                                                             | Asthma                                                           |
|                                                          | Diabetes                                                                                                                 | Depression                                                                                                                              | Asthma                                                                                                                                                | Hypercholesterolaemia / hyperlipidaemia                                     | Osteoarthritis                                                                           | Hypertension                                                     |
|                                                          | Ischemic heart disease                                                                                                   | Diabetes                                                                                                                                | Depression                                                                                                                                            | Osteoarthritis                                                              | Renal disease                                                                            | Dyslipidemia                                                     |
| General Practitioners (Number/FTE)                       | 8/6                                                                                                                      | -/12                                                                                                                                    | 3/3                                                                                                                                                   | 6/4.5                                                                       | -/3                                                                                      | 12/-                                                             |
| Practice Nurses (Number/FTE)                             | 5/-                                                                                                                      | -/4                                                                                                                                     | 3/1.96                                                                                                                                                | 4/1.6                                                                       | -/1                                                                                      | -/3.9                                                            |
| Reception / Administration staff (Number/FTE)            | 7/-                                                                                                                      | -/13                                                                                                                                    | 6/2.54                                                                                                                                                | 5/3.5                                                                       | -/2.5                                                                                    | -/9.8                                                            |
| Practice Manager (Number/FTE)                            | 1/-                                                                                                                      | -/1                                                                                                                                     | 1/-                                                                                                                                                   | 1/0.8                                                                       | -/0.8                                                                                    | 1/-                                                              |
| Medical students (Number/FTE)                            | N/A                                                                                                                      | N/A                                                                                                                                     | 1/1                                                                                                                                                   | N/A                                                                         | N/A                                                                                      | N/A                                                              |
| General Practitioner Average consultation time (minutes) | 20                                                                                                                       | 15                                                                                                                                      | 20                                                                                                                                                    | 23                                                                          | 25                                                                                       | 15                                                               |
| Practice Nurse Average consultation time (minutes)       | 30                                                                                                                       | 30                                                                                                                                      | 15                                                                                                                                                    | 30                                                                          | 20                                                                                       | 15                                                               |
| Additional services offered at practice                  | Physiotherapy, Podiatry, Psychologist/counseling, Youth mental health service, Speech Pathologist, Exercise physiologist | Psychologists, Psychotherapist, Men's health clinic, Chronic disease management, Dietician, Diabetic educator, CVC program, neurologist | Dietitian, Psychiatrist, Podiatry, Australian Hearing – Audio screening, Video conferencing – specialist, Visiting specialists consulting at clinic – | Physiotherapy, Psychology, Dentist, Audiology, Visiting Physicians/surgeons | Osteopath, Chiropractor, Australian Hearing, Psychologist, General surgeon consultations | Diabetes Educator(s), Dietitian, Podiatrist, Mental health nurse |

1  
2  
3  
4  
5  
6  
7  
8  
9  
10  
11  
12  
13  
14  
15  
16  
17  
18  
19  
20  
21  
22  
23  
24  
25  
26  
27  
28  
29  
30  
31  
32  
33  
34  
35  
36  
37  
38  
39  
40  
41  
42  
43  
44  
45  
46

|                                          | Practice A                                                                                                 | Practice B                                                                                                                                                                                                                               | Practice C                                                                                                                                                                                                           | Practice D | Practice E                                                                                                                                                              | Practice F                                                                                                                                                                           |
|------------------------------------------|------------------------------------------------------------------------------------------------------------|------------------------------------------------------------------------------------------------------------------------------------------------------------------------------------------------------------------------------------------|----------------------------------------------------------------------------------------------------------------------------------------------------------------------------------------------------------------------|------------|-------------------------------------------------------------------------------------------------------------------------------------------------------------------------|--------------------------------------------------------------------------------------------------------------------------------------------------------------------------------------|
|                                          |                                                                                                            |                                                                                                                                                                                                                                          | Paediatrics, orthopaedic, Surgeon – general, Physician, Oncology                                                                                                                                                     |            |                                                                                                                                                                         |                                                                                                                                                                                      |
| Accreditation status / year              | Yes / 2018                                                                                                 | Yes / 2018                                                                                                                                                                                                                               | Yes / 2018                                                                                                                                                                                                           | Yes / 2017 | Yes / 2018                                                                                                                                                              | Yes / 2018                                                                                                                                                                           |
| Past safety and quality improvement work | <ul style="list-style-type: none"> <li>• Participation in Collaboratives (2013) – Diabetes wave</li> </ul> | <ul style="list-style-type: none"> <li>• Improvement foundation workshops for chronic kidney disease and diabetes</li> <li>• Closing the gap for ATSI patients</li> <li>• Research study investigating aspirin in the elderly</li> </ul> | <ul style="list-style-type: none"> <li>• Participation in Collaboratives Wave 10</li> <li>• Research studies investigating aspirin in the elderly, mental health, mothers health, bowel cancer prevention</li> </ul> | N/A        | <ul style="list-style-type: none"> <li>• Participation in Collaboratives – Wave 9 – Diabetes</li> <li>• 2018 – Practice Accreditation and Improvement Survey</li> </ul> | <ul style="list-style-type: none"> <li>• Participations in Collaboratives wave projects – Cardiovascular disease &amp; Chronic kidney disease and Improving Diabetes care</li> </ul> |

FTE: Full Time Equivalent

N/A: Not available

## Appendix 2. Crude response rate calculation

|                                                                                        | Practice B |      | Practice C |      | Practice D |      | Practice E |      | Practice F |      | Total |      |
|----------------------------------------------------------------------------------------|------------|------|------------|------|------------|------|------------|------|------------|------|-------|------|
|                                                                                        | T1         | T2   | T1    | T2   |
| Patients completing PC PMOS                                                            | 198        | 197  | 148        | 153  | 130        | 145  | 150        | 158  | 113        | 258  | 739   | 911  |
| All patients presenting for appointment during data collection timeframes <sup>†</sup> | 392        | 489  | 278        | 170  | 550        | 637  | 316        | 220  | 4136       | 8262 | 5672  | 9778 |
| Response rate (%)                                                                      | 50.5       | 40.3 | 53.2       | 90.0 | 23.6       | 22.8 | 47.5       | 71.8 | 2.7        | 3.1  | 13.0  | 9.3  |

† Data on patients presenting for their appointment was extracted for 5 out of the 6 practices using Pen CS software for general practice clinics. Due to data unavailability for one practice, the response rate calculation is a crude estimate only.

T1= Time 1 (Baseline)

T2 = Time 2 (6 months post intervention period)

| T1 and T2 combined | Patients completing PC PMOS (n=1,650) | All patients presenting for appointment during data collection timeframes (n=15,450) <sup>†</sup> |
|--------------------|---------------------------------------|---------------------------------------------------------------------------------------------------|
| Gender (n)         |                                       |                                                                                                   |
| Male (n, %)        | 527 (32.5%)                           | 6701 (43.5%)                                                                                      |
| Female (n, %)      | 1097 (67.5%)                          | 8706 (56.5%)*                                                                                     |
| Age (mean, SD)     | 55.5 (18.2)                           | 48.3 (24.6)*                                                                                      |

\* Statistically significant difference  $p=0.000$

Patients completing the PC PMOS were significantly more likely to be older and female.

### Appendix 3. Staff percent positive scores of patient safety culture

|                                                              | Practice A   |              | Practice B   |              | Practice C   |              | Practice D   |              | Practice E   |              | Practice F   |              | Total        |              |
|--------------------------------------------------------------|--------------|--------------|--------------|--------------|--------------|--------------|--------------|--------------|--------------|--------------|--------------|--------------|--------------|--------------|
|                                                              | T1<br>% (SD) | T2<br>% (SD) |
| Safety culture composites                                    |              |              |              |              |              |              |              |              |              |              |              |              |              |              |
| Communication About Error                                    | 91 (0.2)     | -            | 64 (0.3)     | 50 (0.3)     | 69 (0.2)     | 72 (0.3)     | 94 (0.2)     | 97 (0.1)     | 75 (0.4)     | 75 (0.4)     | 58 (0.4)     | 55 (0.4)     | 72 (0.3)     | 65 (0.3)     |
| Communication Openness                                       | 81 (0.2)     | -            | 66 (0.3)     | 47 (0.4)     | 72 (0.3)     | 64 (0.5)     | 97 (0.1)     | 97 (0.1)     | 70 (0.3)     | 79 (0.3)     | 50 (0.4)     | 50 (0.4)     | 71 (0.3)     | 61 (0.4)     |
| Office Processes and Standardisation                         | 63 (0.2)     | -            | 75 (0.2)     | 66 (0.3)     | 69 (0.3)     | 58 (0.4)     | 91 (0.2)     | 97 (0.1)     | 75 (0.3)     | 83 (0.2)     | 64 (0.3)     | 55 (0.4)     | 73 (0.3)     | 69 (0.3)     |
| Organisational Learning                                      | 100 (0.0)    | -            | 70 (0.4)     | 59 (0.4)     | 70 (0.4)     | 59 (0.5)     | 92 (0.2)     | 74 (0.4)     | 67 (0.5)     | 61 (0.5)     | 33 (0.4)     | 58 (0.3)     | 71 (0.4)     | 61 (0.4)     |
| Overall Perceptions of Patient Safety and Quality            | 72 (0.3)     | -            | 69 (0.4)     | 58 (0.4)     | 72 (0.4)     | 53 (0.5)     | 94 (0.1)     | 78 (0.4)     | 75 (0.4)     | 79 (0.4)     | 39 (0.4)     | 61 (0.3)     | 69 (0.4)     | 63 (0.4)     |
| Owner/Managing Partner/Leadership Support for Patient Safety | 28 (0.4)     | -            | 68 (0.4)     | 50 (0.4)     | 61 (0.4)     | 67 (0.4)     | 56 (0.5)     | 89 (0.3)     | 85 (0.2)     | 91 (0.2)     | 31 (0.4)     | 41 (0.4)     | 56 (0.4)     | 61 (0.4)     |
| Patient Care Tracking/Follow-up                              | 75 (0.4)     | -            | 61 (0.4)     | 61 (0.4)     | 92 (0.1)     | 89 (0.3)     | 91 (0.2)     | 92 (0.1)     | 90 (0.2)     | 75 (0.2)     | 69 (0.4)     | 64 (0.3)     | 75 (0.3)     | 72 (0.3)     |
| Staff Training                                               | 92 (0.2)     | -            | 83 (0.2)     | 85 (0.3)     | 82 (0.4)     | 70 (0.4)     | 83 (0.4)     | 96 (0.1)     | 80 (0.3)     | 89 (0.2)     | 70 (0.4)     | 52 (0.4)     | 82 (0.3)     | 78 (0.3)     |
| Teamwork                                                     | 94 (0.2)     | -            | 85 (0.2)     | 75 (0.3)     | 89 (0.1)     | 53 (0.3)*    | 100 (0.0)    | 100 (0.0)    | 90 (0.1)     | 92 (0.1)     | 86 (0.2)     | 89 (0.2)     | 89 (0.2)     | 80 (0.3)*    |
| Work Pressure and Pace                                       | 23 (0.4)     | -            | 58 (0.3)     | 50 (0.4)     | 31 (0.3)     | 58 (0.4)     | 63 (0.3)     | 86 (0.1)*    | 55 (0.3)     | 67 (0.3)     | 42 (0.5)     | 41 (0.4)     | 47 (0.4)     | 57 (0.4)     |
| Average Across Composites                                    | 72 (0.2)     | -            | 70 (0.2)     | 60 (0.2)     | 71 (0.2)     | 64 (0.3)     | 86 (0.1)     | 91 (0.1)     | 76 (0.3)     | 79 (0.2)     | 54 (0.2)     | 56 (0.3)     | 71 (0.2)     | 67 (0.2)     |
| Overall Rating on Patient Safety (QG2)                       | 88 (0.4)     | -            | 68 (0.5)     | 68 (0.5)     | 78 (0.4)     | 67 (0.5)     | 88 (0.4)     | 100 (0.0)    | 80 (0.5)     | 100 (0.0)    | 44 (0.5)     | 55 (0.5)     | 72 (0.5)     | 74 (0.4)     |

\* statistically significant at  $p < 0.05$

**Appendix 4. Frequency of safety incidents recorded in practice clinical risk management system**

|              | <b>Baseline</b> | <b>Intervention period</b> |
|--------------|-----------------|----------------------------|
| Practice A   | 3               | 6                          |
| Practice B   | 5               | 1                          |
| Practice C   | 4               | 6                          |
| Practice D   | 4               | 3                          |
| Practice E   | 1               | 0                          |
| Practice F   | 15              | 5                          |
| <b>Total</b> | <b>32</b>       | <b>21</b>                  |

Baseline – number of safety incidents recorded from previous 12 months

Intervention period – number of safety incidents recorded during intervention period

# BMJ Open

## Patient feedback for safety improvement in primary care: Results from a feasibility study

|                                  |                                                                                                                                                                                                                                                                                                                                                                                                                                                                                                                                                                                                                  |
|----------------------------------|------------------------------------------------------------------------------------------------------------------------------------------------------------------------------------------------------------------------------------------------------------------------------------------------------------------------------------------------------------------------------------------------------------------------------------------------------------------------------------------------------------------------------------------------------------------------------------------------------------------|
| Journal:                         | <i>BMJ Open</i>                                                                                                                                                                                                                                                                                                                                                                                                                                                                                                                                                                                                  |
| Manuscript ID                    | bmjopen-2020-037887.R1                                                                                                                                                                                                                                                                                                                                                                                                                                                                                                                                                                                           |
| Article Type:                    | Original research                                                                                                                                                                                                                                                                                                                                                                                                                                                                                                                                                                                                |
| Date Submitted by the Author:    | 19-Mar-2020                                                                                                                                                                                                                                                                                                                                                                                                                                                                                                                                                                                                      |
| Complete List of Authors:        | Hernan, Andrea; Deakin University, Deakin Rural Health<br>Giles, Sally; <span class="FO_hovorable_search_text">&lt;span class='FO_FirstWord'&gt;University&lt;/span&gt; of Manchester&lt;/span&gt;, NIHR Greater Manchester Primary Care Patient Safety Translational Research Centre<br/>Beks, Hannah; Deakin University, Deakin Rural Health<br/>McNamara, Kevin; Deakin University, Deakin Rural Health<br/>Klot, Kate; Deakin University, Centre for Rural Emergency Medicine<br/>Binder, Marley; Deakin University, Deakin Rural Health<br/>Versace, Vincent; Deakin University, Deakin Rural Health</span> |
| <b>Primary Subject Heading</b> : | General practice / Family practice                                                                                                                                                                                                                                                                                                                                                                                                                                                                                                                                                                               |
| Secondary Subject Heading:       | Health services research                                                                                                                                                                                                                                                                                                                                                                                                                                                                                                                                                                                         |
| Keywords:                        | Quality in health care < HEALTH SERVICES ADMINISTRATION & MANAGEMENT, PRIMARY CARE, QUALITATIVE RESEARCH, HEALTH SERVICES ADMINISTRATION & MANAGEMENT                                                                                                                                                                                                                                                                                                                                                                                                                                                            |
|                                  |                                                                                                                                                                                                                                                                                                                                                                                                                                                                                                                                                                                                                  |

SCHOLARONE™  
Manuscripts



I, the Submitting Author has the right to grant and does grant on behalf of all authors of the Work (as defined in the below author licence), an exclusive licence and/or a non-exclusive licence for contributions from authors who are: i) UK Crown employees; ii) where BMJ has agreed a CC-BY licence shall apply, and/or iii) in accordance with the terms applicable for US Federal Government officers or employees acting as part of their official duties; on a worldwide, perpetual, irrevocable, royalty-free basis to BMJ Publishing Group Ltd ("BMJ") its licensees and where the relevant Journal is co-owned by BMJ to the co-owners of the Journal, to publish the Work in this journal and any other BMJ products and to exploit all rights, as set out in our [licence](#).

The Submitting Author accepts and understands that any supply made under these terms is made by BMJ to the Submitting Author unless you are acting as an employee on behalf of your employer or a postgraduate student of an affiliated institution which is paying any applicable article publishing charge ("APC") for Open Access articles. Where the Submitting Author wishes to make the Work available on an Open Access basis (and intends to pay the relevant APC), the terms of reuse of such Open Access shall be governed by a Creative Commons licence – details of these licences and which [Creative Commons](#) licence will apply to this Work are set out in our licence referred to above.

Other than as permitted in any relevant BMJ Author's Self Archiving Policies, I confirm this Work has not been accepted for publication elsewhere, is not being considered for publication elsewhere and does not duplicate material already published. I confirm all authors consent to publication of this Work and authorise the granting of this licence.



**TITLE**

Patient feedback for safety improvement in primary care: Results from a feasibility study

**AUTHORS**

Andrea L Hernan<sup>1</sup>, Sally J Giles<sup>2</sup>, Hannah Beks<sup>1</sup>, Kevin Mc Namara<sup>1,3</sup>, Kate Kloot<sup>4</sup>, Marley J Binder<sup>1</sup>, Vincent L Versace<sup>1</sup>

**AUTHOR AFFILIATIONS**

1. Deakin Rural Health, School of Medicine, Deakin University, Geelong, Victoria, Australia
2. NIHR Greater Manchester Patient Safety Translational Research Centre, Division of Population Health, Health Services Research and Primary Care School of Health Sciences, University of Manchester, Manchester, United Kingdom
3. Centre for Population Health Research, Deakin University, Geelong, Australia
4. Centre for Rural Emergency Medicine, Deakin University, Warrnambool, Victoria, Australia

Corresponding author details:

Andrea L Hernan  
Deakin Rural Health  
School of Medicine, Deakin University  
Warrnambool  
Victoria, Australia 3280  
+613 5563 3505  
[andrea.hernan@deakin.edu.au](mailto:andrea.hernan@deakin.edu.au)

Key words: patient safety, primary care, patient involvement, feasibility, quality improvement

**ABSTRACT**

**Objectives:** Patient involvement in safety improvement is a developing area of research. The aim of this study was to investigate the feasibility of a patient feedback on safety intervention in primary care. Specifically, the intervention acceptability, fidelity, implementation enablers and barriers, scalability, and process of systematically collecting safety data were examined.

**Design, setting and participants:** Mixed methods feasibility trial with six purposively selected Australian primary care practices and patients.

**Intervention:** The intervention comprised an iterative process with a cycle of measurement, learning, feedback, action planning, and implementation period of six months.

**Primary and secondary outcomes:** Qualitative and quantitative data relating to feasibility measures (acceptability, fidelity, enablers, barriers, scalability, and process of collecting safety data) were collected and analysed.

**Results:** A total of n=1750 patients provided feedback on safety. There was a statistically significant increase in mean patient safety scores indicating improved safety (4.30 to 4.37, p=0.002). Staff deemed the intervention acceptable, with minor recommendations for improvement. Intervention fidelity was high and implementation enablers were attributed to the intervention structure and framework, use of intuitive problem solving approaches, and multidisciplinary team involvement. Practice-based safety interventions resulted in sustainable and measurable changes to systems for safety, such as increased access to care and improved patient information accuracy.

**Conclusions:** The findings indicate that this innovative patient feedback on safety intervention is feasible for scale-up to a larger effectiveness trial and further spread into policy and practice. This intervention complements existing safety improvement strategies and activities, and integrates into current patient feedback service requirements for Australian primary care. Further research is needed to examine the intervention effects on safety incident reduction.

## ARTICLE SUMMARY

### Strengths and limitations of this study

- A feasibility study was conducted prior to the development and implementation of a large-scale effectiveness trial and wider spread and uptake into policy and practice.
- Several feasibility domains were assessed including intervention acceptability, fidelity, implementation enablers and barriers, scalability, and process of systematically collecting safety data in a primary care.
- A mixed methods approach addressed each feasibility domain and included both qualitative and quantitative data collection and analysis.
- A limitation is that the data collected will be mostly descriptive, and, therefore, the generalisability of the findings may be limited to only one geographical area.

## INTRODUCTION

Involving patients in error prevention and harm reduction activities has gained traction over the past decade.<sup>1-7</sup> Patient engagement has been found to prevent or reduce adverse events, and increase awareness of potential safety risks.<sup>8</sup> Much of this research has centred on hospital settings with the majority of interventions utilising patient feedback mechanisms for safety improvement.<sup>3 8-12</sup> The evidence base regarding patient feedback on safety in primary care is considerably lacking by comparison.

In addition to reporting formal safety incidents<sup>13-16</sup>, patient feedback about processes, systems and structures that lead to safety incidents is an essential piece of the safety intelligence 'jigsaw'.<sup>17</sup> Patients have demonstrated understanding and knowledge about the various conditions in the latent environment that influence safety, such as access to care; communication systems; information and care planning; and transitions between care settings.<sup>17-20</sup> Capturing patient feedback about these contributory factors to safety incidents and using it for safety improvement work in primary care is a developing and novel field of research.<sup>21</sup>

Only one validated, real-time, and theory-derived patient feedback tool for assessment of factors contributing to safety in primary care is currently available - the Primary Care Patient Measure of Safety (PC PMOS).<sup>20 22</sup> The PC PMOS aims to enhance or complement current data collection methods for patient safety in primary care.<sup>20 22</sup> This self-administered tool is an acceptable, efficient, and appropriate mechanism for engaging patients in safety improvement.<sup>11 13 17 23</sup> The PC PMOS also facilitates primary care professionals and organisations learning, and drives implementation of real-time service improvements.<sup>20 21</sup>

The implementation and impact of interventions which use the PC PMOS tool for data-driven improvement and ongoing safety monitoring in primary care remains unexplored. Primary care, like most healthcare settings, is a complex system with multiple and multi-level factors likely to affect implementation of a patient feedback for safety improvement intervention.<sup>24</sup> While common

1  
2  
3 barriers and enablers to implementation of quality and safety improvement interventions have been  
4 published,<sup>25-27</sup> the specific processes and outcomes of using the PC PMOS in a primary care safety  
5 improvement intervention is unknown. Advocates for complexity science and implementation  
6 science in healthcare-improvement-research recommend feasibility studies be conducted prior to  
7 the introduction of large-scale effectiveness trials or wider spread into policy and practice.<sup>24 25 28-30</sup>  
8 Therefore, the aim of this study was to understand the acceptability, fidelity, implementation  
9 enablers and barriers, scalability, and process of systematically collecting safety data in a primary  
10 care patient feedback on safety intervention.

## 21 **METHODS**

22  
23 A detailed description of the study design and sampling frame, intervention, and primary and  
24 secondary outcome measures has been published in the study protocol.<sup>21</sup> A brief overview is  
25 provided below.

### 32 **Study design and sampling frame**

33  
34 This was a mixed methods feasibility trial with six purposively sampled primary care practices from  
35 the southwest region of Victoria, Australia (Appendix 1).

### 40 **Intervention**

41  
42 Intervention tool: PC PMOS

43  
44 The PC PMOS tool is an anonymous 28 item survey covering nine latent conditions in the primary  
45 care environment influencing safety incidents including: access to care, communication, the external  
46 policy environment, information flow, organisation and care planning, patient related factors, the  
47 physical environment, referral systems, and task performance (available on request).<sup>20 22</sup> The PC  
48 PMOS consists of a five point Likert scale with higher scores indicating safer primary care. The PC  
49 PMOS also captures patient reported safety incident data. Patients completing the PC PMOS were  
50  
51  
52  
53  
54  
55  
56  
57  
58  
59  
60

1  
2  
3 provided with a plain language statement and provided informed consent to participate in the  
4  
5 research study.  
6

#### 7 8 Intervention phases 9

10  
11 The intervention comprised an iterative process with a cycle of measurement, learning, feedback,  
12  
13 action planning, and implementation period of six months (Figure 1).  
14

15  
16 Patient feedback about the safety of their care was measured using the PC PMOS tool at baseline  
17  
18 (Time 1 – T1). Primary care teams then used patient feedback from the PC PMOS to develop and  
19  
20 implement specific safety interventions over a six-month period. Patient feedback about the safety  
21  
22 of their care was measured again (PC PMOS) at the end of the intervention period (Time 2 - T2).  
23  
24

25  
26 Primary care practices were asked to form Safety Improvement Teams (SIT). These teams comprised  
27  
28 a minimum of three members and included any combination of Practice Manager, Practice Nurse,  
29  
30 Receptionist or Administration staff, or General Practitioner.  
31

32  
33 SIT members participated in two learning and development workshops on teamwork,  
34  
35 communication, implementation planning, the Model for Improvement's (Mfi) Plan-Do-Study-Act  
36  
37 (PDSA) methodology,<sup>31</sup> and trial information.  
38

39  
40 PC PMOS data from each practice was collated and presented to the SIT at an action planning  
41  
42 meeting. SIT members considered which area(s) of safety improvement to target, and developed  
43  
44 Goals, Measures, Ideas, and PDSA cycles. SIT members were responsible for implementing and  
45  
46 monitoring their specific safety intervention/s through application of multiple PDSA cycles over the  
47  
48 six month period.  
49

#### 50 51 52 **Data collection** 53

54  
55 Primary outcome  
56  
57  
58  
59  
60

1  
2  
3 Feasibility measures included acceptability, intervention fidelity, implementation enablers and  
4  
5 barriers, and scalability. These data were collected using three qualitative methods:  
6  
7

- 8 • recordings and overt observations of SIT members at workshops and action planning  
9 meetings
- 10 • semi-structured interviews with SIT members at trial conclusion
- 11 • reflexive researcher journaling

12  
13  
14  
15  
16  
17  
18 Audio data were transcribed verbatim. Overt participant observation data were recorded using  
19  
20 detailed field note diaries and regular researcher discussion and reflection. Approximately 31 hours  
21  
22 of audio was recorded with participants at workshops (2 x 3 hours), action planning meetings (6 x 1.5  
23  
24 hours), and semi-structured interviews (16 hours – 13 discrete individual or group interviews).  
25  
26

27  
28 Secondary outcomes

#### 29 30 *Patient feedback on contributing factors to safety*

31  
32  
33 Every adult ( $\geq 18$  years) presenting for their appointment was invited by the practice receptionist to  
34  
35 complete the PC PMOS over a three-week period. Patients returned their surveys via a secure survey  
36  
37 return box in the practice waiting room. Surveys were anonymous and completion was voluntary.  
38  
39

#### 40 41 *Patient reported safety incidents and concerns*

42  
43  
44 The PC PMOS contains questions for patients to report any patient safety incident. Questions were  
45  
46 adapted from the 'Patient Incident Reporting Tool' used in the Patient Reporting and Action for a  
47  
48 Safe Environment intervention.<sup>32</sup> The PC PMOS has an 'other comments' free text question which  
49  
50 also provides patients the opportunity to report safety incidents or concerns.  
51  
52

#### 53 54 *Staff safety culture*

55  
56  
57 The validated Agency for Healthcare Research and Quality Medical Office Survey (MOS) on Patient  
58  
59 Safety<sup>33</sup> was used to obtain data about staff safety culture perceptions at baseline (T1) (prior to  
60

1  
2  
3 patient data collection) and after the intervention (T2). All staff were invited to complete the survey  
4  
5 and return it to the researcher via a provided pre-paid envelope. Surveys were anonymous and  
6  
7 completion was voluntary.  
8  
9

### 10 *Safety incident reports*

11  
12  
13 Practice Managers provided a de-identified copy of their practice's clinical risk management/safety  
14  
15 incident register from the previous 12 months at T1 and T2. Due to lack of detailed data provided on  
16  
17 the register, specific analysis or categorisation of the safety incidents was unable to be performed.  
18  
19 However, the type of incident and any patient demographic data (age, gender) were cross checked  
20  
21 with the patient reported safety incidents on the PC PMOS to assess for similarities or differences.  
22  
23  
24

### 25 **Data analysis**

#### 26 27 28 Primary outcome

29  
30  
31 Triangulation and thematic analysis techniques were employed to analyse the qualitative and  
32  
33 content data. Both inductive and deductive approaches were used to undertake the analysis.<sup>34</sup>  
34  
35 Deductive approaches utilised the literature about healthcare culture and safety improvement,  
36  
37 patient feedback and response theory, health service implementation science, and engagement and  
38  
39 adaption theory.<sup>25-27 35 36</sup> Inductive coding was also performed on qualitative and content data by  
40  
41 three researchers (AH, SG, HB). The initial coding framework centred on the feasibility measures of  
42  
43 intervention enablers, barriers, acceptability, fidelity, and scalability. This framework was expanded  
44  
45 through constant comparison with the data to create the final coding framework. Discrepancies  
46  
47 between researchers were resolved through discussion. NVivo (QSR International Pty Ltd) was used  
48  
49 to support the analysis.  
50  
51  
52  
53

#### 54 *Intervention fidelity score*

55  
56  
57  
58  
59  
60



1  
2  
3 Intervention fidelity refers to the implementation of safety improvement interventions being  
4 delivered as intended.<sup>37</sup> The number of safety interventions implemented at each practice was  
5 assessed by the research team using a three choice response option– yes, no, or partially.  
6  
7  
8  
9

#### 10 Secondary outcomes

11  
12  
13 Quantitative data were analysed using SPSS Statistics (IBM version 24). Continuous variables were  
14 compared pre- and post-intervention using t-tests, while comparisons for non-parametric data used  
15 the Mann–Whitney U test. Categorical variables were compared using chi square-tests. Results were  
16 considered statistically significant where  $p \leq 0.05$ .  
17  
18  
19  
20  
21  
22

23 The MOS percent positive scores for each ten patient safety culture composites, the average score  
24 across the ten composites, and the overall patient safety rating were calculated at T1 and T2 for  
25 each practice, and overall using t-tests.  
26  
27  
28  
29

#### 30 Patient and Public Involvement

31  
32  
33 Patients directly participated in the priority setting of safety interventions at a local level.  
34 Specifically, patients concerns or experiences with systems for safety in the primary care  
35 environment (e.g. access to care, communication, information and referral processes, organisation  
36 and care planning) were acted on by primary care teams through development and implementation  
37 of interventions which prevent safety incidents from occurring.  
38  
39  
40  
41  
42  
43  
44

#### 45 Ethics approval

46  
47  
48 Ethics approval was obtained from Deakin University Human Ethics Advisory Group, Faculty of  
49 Health. Project number: HEAG-H 175\_2017.  
50  
51  
52  
53  
54  
55

## 56 RESULTS

### 57 Primary outcome

58  
59  
60

1  
2  
3 Representative participant quotes corresponding to feasibility measures are presented in Table 1.  
4  
5  
6  
7  
8

9 Acceptability

10  
11 *Intervention acceptability*  
12  
13

14 The majority of staff found the intervention acceptable. Staff reported that the intervention was  
15 predominantly positive and fitted within current organisational approaches to quality improvement.  
16  
17  
18

19 *Attitude towards patient feedback on safety*  
20  
21

22 All staff valued patient feedback on safety. Positive feedback was welcomed and viewed as  
23 contributing to workplace morale, job satisfaction, and reassurance that staff were meeting patient  
24 expectations. Feedback on safety was accepted when it aligned with staff awareness of issues.  
25  
26  
27

28 Furthermore, staff acceptance of the patient's reality also influenced believability of the feedback.  
29  
30

31 Staff exhibited a range of responses to negative patient feedback, including: acceptance; feelings of  
32 empathy, surprise, or uncertainty; or being dismissive of feedback.  
33  
34  
35

36 Commonly mentioned reasons for dismissing patient feedback involved unrealistic patient  
37 expectations; deeming patient concerns too problematic to fix or out of the practice's control;  
38 previous attempts to solve the problem have failed; or the patient was a known difficult patient  
39 (some staff speculated who a patient was even though the survey is anonymous).  
40  
41  
42  
43  
44  
45

46 *Using patient feedback to make changes*  
47  
48

49 Some staff were cautious about using the patient feedback for safety improvement activity. They  
50 contextualised the feedback in terms of where it may be coming from and how appropriate it would  
51 be to respond. Additionally, some mentioned difficulties in choosing priority areas to address due to  
52 largely positive patient scores limiting what they could respond to.  
53  
54  
55  
56  
57  
58  
59  
60

1  
2  
3 Four of the six practice teams saw this trial as a catalyst for undertaking improvements that aligned  
4 with previously identified staff priorities, and not responding directly to the patient feedback. Two  
5  
6 practice teams attempted to link their chosen safety interventions back to domains of safety on the  
7  
8 PC PMOS. For example, improving waiting time or availability of appointments was a focus area for  
9  
10 staff yet the PC PMOS scores relating to access to care were largely positive. The other two practices  
11  
12 did not attempt to link their previously identified target area to a PC PMOS domain of safety. The  
13  
14 remaining two practices chose to address areas that were directly related to areas of concern  
15  
16 highlighted from the patient feedback. This was either a patient reported safety incident or a  
17  
18 negatively scored PC PMOS domain.  
19  
20  
21  
22  
23  
24  
25  
26

## 27 Implementation of safety interventions

### 28 29 *Intervention fidelity*

30  
31  
32 The average intervention duration of 5.8 months was considered acceptable by most practice teams.  
33  
34 Among the six practices, 25 safety improvement interventions were developed at the action  
35  
36 planning meeting or during the implementation period. Of these, 17 (68%) were fully implemented,  
37  
38 2 (8%) partially implemented, and 6 (24%) not implemented.  
39  
40  
41

42 The safety priorities targeted at the six practices included improvement in the following areas:  
43  
44 communication of patient recall and reminders, access to equipment and supplies, access to care,  
45  
46 accuracy of patient information, management of staff time, patient experience of waiting time, and  
47  
48 patient knowledge of registrar skills and abilities. There were no differences observed in success of  
49  
50 interventions that addressed either relational (communication, behaviour change etc.) or  
51  
52 transactional issues (data cleaning, equipment and supplies etc.). Other mediating and contextual  
53  
54 factors in the practice environment were attributed to the success or failure of safety interventions  
55  
56 by staff.  
57  
58  
59  
60

### *Barriers and enablers to intervention development and implementation*

#### Developing interventions

Staff employed both intuition and problem solving processes to develop safety interventions. This process appeared to be an enabler for practice teams. This often took the form of a rapid and informal root cause analysis where common sense and a pragmatic approach was apparent. This process did not require external facilitation and staff were easily able to identify latent conditions in the practice that contributed to the safety concern. Staff reported regular use of this approach for safety and quality improvement activities unrelated to this project, but had not recognised it as formal improvement work.

Some teams experienced challenges with translating their intuitive problem solving approach onto the Mfl framework. There was a perceived disconnect between the two problem solving methods. This mainly related to adjusting to new habits or ways of working and adhering to a structured process. Practice teams with greater quality improvement experience were better able to integrate these approaches and adapt accordingly.

#### Implementing interventions

The high intervention fidelity shown in this trial was attributed to various factors. One key enabler was the multidisciplinary dynamic within the SIT. The teams largely consisted of a practice manager, administration staff member, and a practice nurse. GPs adopted a more passive role in implementation. Nonetheless, GPs were engaged and supportive of the SIT and provided leadership and support when needed. Since most SITs comprised a practice manager, administration staff and a practice nurse, it was difficult to make comparisons about the effectiveness of teams that had different combination of staff roles.

Practice managers and administration staff often took primary responsibility and ownership for safety intervention implementation. As the interventions addressed the latent conditions within the

1  
2  
3 primary care system that contribute to safety incidents, the corresponding activities and tasks often  
4  
5 required input from administration staff rather than clinical staff. For example, ensuring patient  
6  
7 demographic information was up-to-date or improving appointment scheduling were viewed as  
8  
9 tasks to be undertaken by administration staff who are skilled and knowledgeable in this area.  
10  
11

12  
13 Staff generally agreed that the Mfl was a useful and familiar structure for implementing safety  
14  
15 interventions. However, a few teams experienced some implementation challenges relating to the  
16  
17 prescriptive nature and linear processes proposed in the model. Lack of model flexibility and  
18  
19 adaptability were commonly cited as implementation barriers.  
20  
21

22  
23 Staff also found measuring change difficult for various reasons. Identifying an appropriate measure  
24  
25 directly relating to their safety intervention was challenging. For example, some staff indicated it  
26  
27 was difficult to measure clinical outcomes or safety incidents averted. Often soft or proxy measures  
28  
29 were used due to unavailability or inaccessibility of data.  
30  
31

32  
33 Staff identified a number of other barriers to implementation. These were common across all  
34  
35 practices and included lack of protected time, demanding priorities particularly for patient care,  
36  
37 issues with staff recruitment and retention as well as staff leave, power and team dynamics,  
38  
39 management support, and engagement from the wider practice.  
40  
41

#### 42 43 44 Scalability

45  
46  
47 Staff recommended some improvements to the structure and components of the intervention that  
48  
49 would enable future scale-up to a larger effectiveness trial or spread into policy and practice (Box 1).  
50  
51

52  
53 Existing practice infrastructure and resources were deemed adequate for participation.  
54  
55

56  
57 The two learning workshops and facilitated action planning meeting with the research team were  
58  
59 viewed as important. While the majority of staff felt that this level of facilitation was adequate,  
60

1  
2  
3 others suggested additional action planning meetings throughout the intervention phase would  
4  
5 assist with accountability and implementation progress.  
6  
7

8 Patient data collection using the PC PMOS was considered relatively straightforward by practice  
9  
10 staff. Only one practice (Practice A) failed to complete T2 data collection. Reasons for this included  
11  
12 staff leave and patient survey fatigue. As the PC PMOS was a paper-based survey staff felt that  
13  
14 improvements could centre on electronic data collection to increase the efficiency of real-time  
15  
16 patient feedback, for example, via the use of waiting room iPads or emails to patients after their  
17  
18 consultation.  
19  
20  
21  
22  
23  
24

## 25 **Secondary outcomes**

26  
27  
28 Patient feedback on contributing factors to safety - PC PMOS scores  
29

30  
31 A total of n=1750 patients completed the PC PMOS at T1 and T2 (n=839 T1, n=911 T2), representing  
32  
33 a practice mean of 140 and 182 at T1 and T2 respectively. The crude response rate was 10.7%,  
34  
35 however the average response rate across the practices was 40.6%. Patient characteristics are  
36  
37 presented in Table 2. Patients completing the PC PMOS were significantly more likely to be older and  
38  
39 female (Appendix 2). Mean age was 56 years (SD 18.2) and mean number of visits to the practice in  
40  
41 the previous 12 months was 8 (SD 8.6).  
42  
43  
44

45 The PC PMOS total mean scores and domain scores for each practice at both times points are  
46  
47 presented in Table 3. There was a significant increase in total mean PC PMOS score for all practices  
48  
49 from T1 to T2 suggesting improved patient safety (4.30 (SD=0.49) to 4.37 (SD=0.47), p=0.002). There  
50  
51 were also significant increases in mean scores for all practices from T1 to T2 for the following  
52  
53 domains: access to care (4.09 to 4.23, p<0.001), communication (4.44 to 4.50, p=0.018), information  
54  
55 flow (4.27 to 4.36, p=0.007), and patient related factors (4.51 to 4.61, p<0.001). There was within  
56  
57 and between practice variation for specific PC PMOS domain scores (Table 3).  
58  
59  
60

1  
2  
3 Patient reported safety incidents and concerns data  
4  
5

6 Patient reported safety incident data are presented in Table 4. There were n=11 patient reported  
7  
8 safety incidents at T1, and n=9 at T2. The mean severity rating at T1 and T2 was 7.4 (scale 1 to 10  
9  
10 with 10 being 'extremely serious'). The median preventability rating of these safety incidents was  
11  
12 'Definitely preventable' at T1, and 'Probably preventable' at T2.  
13  
14

15 An additional n=17 safety incidents at T1, and n=12 at T2 were identified from the 'other comments'  
16  
17 section of the PC PMOS. Therefore, the total number of patient reported safety incidents was n=28  
18  
19 at T1, and n=21 at T2. The number of patient reported concerns (negative comments that were not a  
20  
21 patient safety incident) decreased from n=45 at T1 to n=25 at T2 (Table 4).  
22  
23  
24

25 Practice measures of safety  
26  
27

#### 28 *Staff perceptions of safety culture* 29 30

31 A total of n=57 staff completed the MOS survey at T1, and n=61 at T2. For the total sample there  
32  
33 was an increase in the mean percent positive score for the overall patient safety rating between T1  
34  
35 and T2, although not significant (72% to 74%, p=0.851). For the majority of the patient safety culture  
36  
37 composites and the average across the ten composites there was a reduction in mean percent  
38  
39 positive scores, with only one significant reduction for the Teamwork composite between T1 and T2  
40  
41 (89% to 80% p=0.029) (Appendix 3).  
42  
43  
44

#### 45 *Safety incidents recorded on practice clinical risk management system* 46 47

48 There was a reduction in the number of incidents recorded on practice's clinical risk management  
49  
50 system from T1 (n=32) to T2 (n=21) (Appendix 4). The incidents recorded on the practice clinical risk  
51  
52 management system were different to the incidents reported by patients on the PC PMOS.  
53  
54  
55  
56  
57

## 58 **DISCUSSION** 59 60

1  
2  
3 This is the first reported patient feedback on safety intervention in Australian primary care. The  
4  
5 findings indicate that the intervention is feasible for scale-up to a larger effectiveness trial and  
6  
7 further spread into policy and practice. Staff deemed the intervention acceptable, with minor  
8  
9 recommendations for improvement. Intervention fidelity was high and implementation enablers  
10  
11 were attributed to the intervention structure and framework, use of intuitive problem solving  
12  
13 approaches, and multidisciplinary team involvement. Barriers to implementation reflected  
14  
15 previously reported problems undertaking quality improvement in primary care, such as lack of time  
16  
17 and staff, demanding priorities, power and team dynamics, and wider practice support and  
18  
19 engagement.<sup>25-27</sup> The process of systematically collecting patient safety data was achievable with  
20  
21 n=1750 patient surveys completed. The utility of the PC PMOS tool as a measure for safety was  
22  
23 demonstrated through the significant increase in mean scores for all practices from T1 to T2 (4.30 to  
24  
25 4.37, p=0.002).

26  
27  
28  
29  
30 It is widely acknowledged that patient feedback is rarely used for safety and quality improvement  
31  
32 purposes.<sup>38-46</sup> This study identified some enablers and barriers that impacted on the intervention  
33  
34 development and implementation including the team dynamic, improvement framework, and staff  
35  
36 attitude.

37  
38  
39  
40 A unique aspect of this patient feedback on safety intervention was the multidisciplinary dynamic of  
41  
42 the primary care teams, particularly administration staff leadership. This was considered a key  
43  
44 enabler to intervention adherence and acceptability. The safety interventions targeted the  
45  
46 contributing factors to safety incidents; as such, administration staff were ideally placed for  
47  
48 intervention delivery. Administration staff transcended professional boundaries to generate  
49  
50 engagement and support, and implement changes at the latent end of the primary care system. In  
51  
52 this respect administration staff acted as change agents and innovators<sup>35 47 48</sup> and future safety  
53  
54 improvement work should consider their current underutilised role.  
55  
56  
57  
58  
59  
60



1  
2  
3 Although the Model for Improvement's Plan-Do-Study-Act cycle<sup>31</sup> is considered an effective,  
4 adaptable and flexible framework for quality improvement in some contexts, practice staff in this  
5 study identified it as a barrier to implementation. Formalising and documenting action plans in PDSA  
6 cycles was often in disconnect to their natural problem solving approach and routine practice. In a  
7 time, resource, and capacity scarce environment it is important that safety improvement  
8 frameworks are simple, and easily integrate or mimic everyday work flow. There are several well  
9 established quality improvement models<sup>49-51</sup> that could be utilised for this patient feedback on  
10 safety intervention, however more research is needed to identify and investigate staff acceptability  
11 and appropriateness of the different frameworks in this context.<sup>52</sup>

12  
13  
14 Staff attitude towards patient feedback on safety was similar to previous research, which reveals  
15 staff difficulty to engage with or value patient feedback.<sup>36 38 41 42 45 53-57</sup> While staff described the value  
16 and benefit of seeking patient feedback on safety, this was not entirely reflected in action plans or  
17 translated during intervention implementation. More than half of the practice teams undertook  
18 safety interventions that were a priority for staff rather than a priority for the patient.

19  
20  
21 Recommendations to improve staff action on patient feedback could centre on providing staff with  
22 structured and specific intervention examples that correspond to particular domains of safety on the  
23 PC PMOS. Moreover, such intervention examples could have explicitly linked measures of safety to  
24 each of the PC PMOS domains which may address the challenges staff experienced with creating  
25 measures of change.<sup>58</sup>

26  
27  
28 The process of systematically collecting primary care safety data from the practice, staff and patients  
29 was acceptable and feasible, yet some consideration is needed when determining appropriate  
30 measures of intervention effectiveness in a larger trial. Data about patient safety in primary care in  
31 Australia is largely absent. Australia does not have a structured or connected reporting and learning  
32 system to understand the threats to patient safety, and there is no current systematic way to collect  
33 information about safety incidents or patient harm.<sup>59 60</sup> Using available sources of patient safety data

1  
2  
3 in this study revealed some limitations; as such, objective measures of intervention effectiveness like  
4  
5 statistical control charts<sup>61 62</sup>, PDSA cycle evaluation tools<sup>63 64</sup>, and record review<sup>65 66</sup> are  
6  
7 recommended.  
8  
9

10 A limitation of this study was the sample. The practices were from one regional area, which may  
11  
12 limit the generalisability of the findings. However, the diversity within the practices was considered  
13  
14 adequate for this feasibility study. All practices had participated in one or more of the Australian  
15  
16 Primary Care Collaborative Program<sup>67</sup> waves previously. Their commitment, interest, and  
17  
18 understanding of safety and quality improvement processes was potentially already elevated prior  
19  
20 to study commencement when compared with other practices. Results suggest the merit of  
21  
22 conducting a larger scale effectiveness-implementation trial to determine the translatability of this  
23  
24 intervention program and safety outcomes to primary care practices more generally.  
25  
26  
27  
28  
29  
30  
31

## 32 **Conclusion**

33  
34  
35 This study's findings have demonstrated the feasibility of introducing an innovative patient feedback  
36  
37 for safety improvement intervention in primary care, as well as contextual and intervention factors  
38  
39 that promote safety improvement. The intervention complements existing safety improvement  
40  
41 strategies and activities, and integrates into current patient feedback service requirements for  
42  
43 primary care. Further research is needed to examine the intervention effects on safety incident  
44  
45 reduction.  
46  
47  
48  
49  
50  
51  
52  
53  
54  
55  
56  
57  
58  
59  
60

## Acknowledgements

The authors acknowledge the practice staff and patients who participated in this study. The authors would also like to acknowledge the administrative support from Gillian Beard and Liz Jackway.

## Contributors

ALH conceived and designed the study, and was principal investigator for the study. SJG, KMN, KK, and VV contributed to the study design. ALH, SG and HB were responsible for the qualitative data analysis and manuscript preparation. VV was responsible for the quantitative data analysis and manuscript preparation. ALH created the first draft of the manuscript and was responsible for its revisions. SJG, HB, KMN, KK, MJB, and VV contributed to specific sections of the manuscript. All authors read and approved the final version of the manuscript.

## Funding

This work was supported by the Western Alliance Academic Health Science Centre (grant number WA-733721).

## Competing interests

None declared.

## Data sharing statement

Data are available upon request to the authors.

## Ethics approval

Ethics approval was granted by the Deakin University Human Ethics Advisory Group, Faculty of Health (HEAG-H 175\_2017).

1  
2  
3 **REFERENCES**  
4  
5

- 6 1. Severinsson IE, Holm AL. Patient's role in their own safety-a systematic review of patient  
7 involvement in safety. *Open Journal of Nursing* 2015;5:642-53.  
8  
9  
10 2. Sutton E, Eborall H, Martin G. Patient Involvement in Patient Safety: Current experiences, insights  
11 from the wider literature, promising opportunities? *Public Management Review*  
12 2014;17(1):72-89. doi: 10.1080/14719037.2014.881538  
13  
14  
15 3. Hall J, Peat M, Birks Y, et al. Effectiveness of interventions designed to promote patient  
16 involvement to enhance safety: a systematic review. *Qual Saf Health Care* 2010;19(5):1-7.  
17  
18  
19 4. World Health Organization. Patient Engagement: Technical Series on Safer Primary Care. Geneva:  
20 WHO, 2016.  
21  
22  
23 5. Auraaen A, Slawomirski L, Klazinga N. The economics of patient safety in primary and ambulatory  
24 care: Flying blind. OECD Health Working Papers No 106. Directorate for Employment, Labour  
25 and Social Affairs, Health Division: Organisation for Economic Co-operation and  
26 Development, 2018.  
27  
28  
29 6. Health Foundation. Involving patients in improving safety. London, UK: The Health Foundation,  
30 2013.  
31  
32  
33 7. Vincent C, Davis R. Patients and families as safety experts. *CMAJ* 2012;184(1):15-16.  
34  
35  
36 8. Park M, Giap TTT. Patient and family engagement as a potential approach for improving patient  
37 safety: A systematic review. *J Adv Nurs* 2019  
38  
39  
40 9. Berger Z, Flickinger TE, Pfoh E, et al. Promoting engagement by patients and families to reduce  
41 adverse events in acute care settings: a systematic review. *BMJ Qual Saf* 2014;23(7):548-55.  
42  
43  
44 doi: 10.1136/bmjqs-2012-001769  
45  
46  
47 10. Birks Y, Hall J, McCaughan D, et al. Promoting patient involvement in safety initiatives. *Nurs*  
48 *Manag (Harrow)* 2011;18(1):16-20.  
49  
50  
51 11. Lawton R, Armitage G. The role of the patient in clinical safety. London UK: Health Foundation,  
52 2012.  
53  
54  
55  
56  
57  
58  
59  
60

- 1  
2  
3  
4  
5  
6  
7  
8  
9  
10  
11  
12  
13  
14  
15  
16  
17  
18  
19  
20  
21  
22  
23  
24  
25  
26  
27  
28  
29  
30  
31  
32  
33  
34  
35  
36  
37  
38  
39  
40  
41  
42  
43  
44  
45  
46  
47  
48  
49  
50  
51  
52  
53  
54  
55  
56  
57  
58  
59  
60
12. Lawton R, O'Hara JK, Sheard L, et al. Can patient involvement improve patient safety? A cluster randomised control trial of the Patient Reporting and Action for a Safe Environment (PRASE) intervention. *BMJ Qual Saf* 2017;26:622-31. doi: 10.1136/bmjqs-2016-005570
  13. Sahlström M, Partanen P, Turunen H. Patient-reported experiences of patient safety incidents need to be utilized more systematically in promoting safe care. *Int J Qual Health Care* 2018;30(10):778-85. doi: 10.1093/intqhc/mzy074
  14. Stocks SJ, Donnelly A, Esmail A, et al. Frequency and nature of potentially harmful preventable problems in primary care from the patient's perspective with clinician review: a population-level survey in Great Britain. *BMJ Open* 2018;8(6):e020952. doi: 10.1136/bmjopen-2017-020952
  15. Armitage G, Moore S, Reynolds C, et al. Patient-reported safety incidents as a new source of patient safety data: an exploratory comparative study in an acute hospital in England. *J Health Serv Res Policy* 2018;23(1):36-43. doi: 10.1177/1355819617727563
  16. O'Hara JK, Reynolds C, Moore S, et al. What can patients tell us about the quality and safety of hospital care? Findings from a UK multicentre survey study. *BMJ Qual Saf* 2018;27(9):673-82. doi: 10.1136/bmjqs-2017-006974
  17. O'Hara JK, Isden R. Identifying risks and monitoring safety: the role of patients and citizens. Thought paper: The Health Foundation, 2013.
  18. Giles SJ, Lawton RJ, Din I, et al. Developing a patient measure of safety (PMOS). *BMJ Qual Saf* 2013;22(7):554-62. doi: 10.1136/bmjqs-2012-000843
  19. Hernan A, Giles S, Fuller J, et al. Patient and carer identified factors which contribute to safety incidents in primary care: a qualitative study. *BMJ Qual Saf* 2015;24(9):583-93. doi: 10.1136/bmjqs-2015-004049
  20. Hernan AL, Giles SJ, O'Hara JK, et al. Developing a primary care patient measure of safety (PC PMOS): a modified Delphi process and face validity testing. *BMJ Qual Saf* 2016;25(4):273-80. doi: 10.1136/bmjqs-2015-004268

- 1  
2  
3 21. Hernan AL, Kloot K, Giles SJ, et al. Investigating the feasibility of a patient feedback tool to  
4  
5 improve safety in Australian primary care: a study protocol. *BMJ Open* 2019;9(5):e027327.  
6  
7 doi: 10.1136/bmjopen-2018-027327  
8  
9
- 10 22. Giles SJ, Parveen S, Hernan AL. Validation of the Primary Care Patient Measure of Safety (PC  
11  
12 PMOS) questionnaire. *BMJ Qual Saf* 2019;28(5):389-96. doi: 10.1136/bmjqs-2018-007988  
13  
14
- 15 23. Smith K, Baker K, Wesley D, et al. Guide to Improving Patient Safety in Primary Care Settings by  
16  
17 Engaging Patients and Families: Environmental Scan Report. Rockville, MD: Agency for  
18  
19 Healthcare Research and Quality, 2017.  
20
- 21 24. Braithwaite J. Changing how we think about healthcare improvement. *BMJ* 2018;361:k2014. doi:  
22  
23 10.1136/bmj.k2014  
24
- 25 25. Braithwaite J, Marks D, Taylor N. Harnessing implementation science to improve care quality and  
26  
27 patient safety: a systematic review of targeted literature. *Int J Qual Health Care*  
28  
29 2014;26(3):321-9. doi: 10.1093/intqhc/mzu047  
30  
31
- 32 26. Brennan SE, Bosch M, Buchan H, et al. Measuring organizational and individual factors thought to  
33  
34 influence the success of quality improvement in primary care: a systematic review of  
35  
36 instruments. *Implement Sci* 2012;7(1):121. doi: 10.1186/1748-5908-7-121  
37  
38
- 39 27. Kaplan HC, Provost LP, Froehle CM, et al. The Model for Understanding Success in Quality  
40  
41 (MUSIQ): building a theory of context in healthcare quality improvement. *BMJ Qual Saf*  
42  
43 2012;21(1):13-20. doi: 10.1136/bmjqs-2011-000010  
44  
45
- 46 28. Nilsen P, Bernhardsson S. Context matters in implementation science: a scoping review of  
47  
48 determinant frameworks that describe contextual determinants for implementation  
49  
50 outcomes. *BMC Health Serv Res* 2019;19(1):189.  
51
- 52 29. Greenhalgh T, Papoutsi C. Spreading and scaling up innovation and improvement. *BMJ*  
53  
54 2019;365:l2068. doi: 10.1136/bmj.l2068  
55  
56
- 57 30. Greenhalgh T, Papoutsi C. Studying complexity in health services research: desperately seeking  
58  
59 an overdue paradigm shift. *BMC Medicine* 2018;16(1):95. doi: 10.1186/s12916-018-1089-4  
60

- 1  
2  
3 31. Langley G, Moen R, Nolan K, et al. The improvement guide: a practical approach to enhancing  
4  
5 organizational performance: John Wiley & Sons 2009.  
6  
7  
8 32. Wright J, Lawton R, O'Hara J, et al. Chapter 6, Learning from error: a comparative study of  
9  
10 patient-reported patient safety incidents and existing sources of patient safety data.  
11  
12 Improving patient safety through the involvement of patients: development and evaluation  
13  
14 of novel interventions to engage patients in preventing patient safety incidents and  
15  
16 protecting them against unintended harm. Southampton (UK): NIHR Journals Library 2016.  
17  
18  
19 33. Agency for Healthcare Research and Quality. Medical Office Survey on patient safety culture.  
20  
21 Rockville, MD 2017.  
22  
23  
24 34. Tavory I, Timmermans S. Abductive analysis: Theorizing qualitative research: University of  
25  
26 Chicago Press 2014.  
27  
28 35. Sheard L, Marsh C, O'Hara J, et al. Exploring how ward staff engage with the implementation of a  
29  
30 patient safety intervention: a UK-based qualitative process evaluation. *BMJ Open* 2017;7(7)  
31  
32 doi: 10.1136/bmjopen-2016-014558  
33  
34  
35 36. Sheard L, Marsh C, O'Hara J, et al. The Patient Feedback Response Framework – Understanding  
36  
37 why UK hospital staff find it difficult to make improvements based on patient feedback: A  
38  
39 qualitative study. *Soc Sci Med* 2017;178:19-27. doi: 10.1016/j.socscimed.2017.02.005  
40  
41  
42 37. Carroll C, Patterson M, Wood S, et al. A conceptual framework for implementation fidelity.  
43  
44 *Implement Sci* 2007;2(1):40. doi: 10.1186/1748-5908-2-40  
45  
46  
47 38. Baldie DJ, Guthrie B, Entwistle V, et al. Exploring the impact and use of patients' feedback about  
48  
49 their care experiences in general practice settings—a realist synthesis. *Fam Pract*  
50  
51 2017;35(1):13-21. doi: 10.1093/fampra/cmz067  
52  
53  
54 39. Sheard L, Peacock R, Marsh C, et al. What's the problem with patient experience feedback? A  
55  
56 macro and micro understanding, based on findings from a three-site UK qualitative study.  
57  
58 *Health Expect* 2019;22(1):46-53. doi: 10.1111/hex.12829  
59  
60

- 1  
2  
3 40. de Vos MS, Hamming JF, Marang-van de Mheen PJ. The problem with using patient complaints  
4  
5 for improvement. *BMJ Qual Saf* 2018;27(9):758-62. doi: 10.1136/bmjqs-2017-007463  
6  
7  
8 41. Flott KM, Graham C, Darzi A, et al. Can we use patient-reported feedback to drive change? The  
9  
10 challenges of using patient-reported feedback and how they might be addressed. *BMJ Qual*  
11  
12 *Saf* 2017;26(6):502-07. doi: 10.1136/bmjqs-2016-005223  
13  
14 42. Boiko O, Campbell JL, Elmore N, et al. The role of patient experience surveys in quality assurance  
15  
16 and improvement: a focus group study in English general practice. *Health Expect*  
17  
18 2015;18(6):1982-94. doi: 10.1111/hex.12298  
19  
20 43. Gardner K, Parkinson A, Banfield M, et al. Usability of patient experience surveys in Australian  
21  
22 primary health care: a scoping review. *Aust J Prim Health* 2016;22(2):93-99. doi:  
23  
24 10.1071/PY14179  
25  
26 44. Davies E, Cleary PD. Hearing the patient's voice? Factors affecting the use of patient survey data  
27  
28 in quality improvement. *Qual Saf Health Care* 2005;14(6):428-32. doi:  
29  
30 10.1136/qshc.2004.012955  
31  
32 45. Greenhalgh J, Dalkin S, Gooding K, et al. Functionality and feedback: a realist synthesis of the  
33  
34 collation, interpretation and utilisation of patient-reported outcome measures data to  
35  
36 improve patient care. Southampton (UK): NIHR Journals Library 2017.  
37  
38  
39 46. Gleeson H, Calderon A, Swami V, et al. Systematic review of approaches to using patient  
40  
41 experience data for quality improvement in healthcare settings. *BMJ Open*  
42  
43 2016;6(8):e011907. doi: 10.1136/bmjopen-2016-011907  
44  
45  
46 47. Greenhalgh T. Role of routines in collaborative work in healthcare organisations. *BMJ*  
47  
48 2008;337:a2448. doi: 10.1136/bmj.a2448  
49  
50  
51 48. Lucas B, Nacer H. The habits of an improver: thinking about learning for improvement in  
52  
53 healthcare. London: The Health Foundation, 2015.  
54  
55  
56 49. Toussaint JS, Berry LL. The Promise of Lean in Health Care. *Mayo Clin Proc* 2013;88(1):74-82. doi:  
57  
58 10.1016/j.mayocp.2012.07.025  
59  
60



- 1  
2  
3 50. Schroeder RG, Linderman K, Liedtke C, et al. Six Sigma: Definition and underlying theory. *Journal*  
4  
5 *of Operations Management* 2008;26(4):536-54. doi: 10.1016/j.jom.2007.06.007  
6  
7  
8 51. Brannan KM. Total quality in health care. *Hosp Mater Manage Q* 1998;19(4):1-8.  
9  
10 52. Johnson A, Clay-Williams R, Lane P. Framework for better care: reconciling approaches to patient  
11  
12 safety and quality. *Aust Health Rev* 2019;43(6):653-55. doi: 10.1071/AH18050  
13  
14 53. Burt J, Campbell J, Abel G, et al. Programme Grants for Applied Research. Improving patient  
15  
16 experience in primary care: a multimethod programme of research on the measurement and  
17  
18 improvement of patient experience. Southampton (UK): NIHR Journals Library 2017.  
19  
20 54. Wensing M, Vingerhoets E, Grol R. Feedback based on patient evaluations: a tool for quality  
21  
22 improvement? *Patient Educ Couns* 2003;51(2):149-53. doi: 10.1016/S0738-3991(02)00199-4  
23  
24  
25 55. Farrington C, Burt J, Boiko O, et al. Doctors' engagements with patient experience surveys in  
26  
27 primary and secondary care: a qualitative study. *Health Expect* 2017;20(3):385-94. doi:  
28  
29 10.1111/hex.12465  
30  
31  
32 56. Asprey A, Campbell JL, Newbould J, et al. Challenges to the credibility of patient feedback in  
33  
34 primary healthcare settings: a qualitative study. *Br J Gen Pract* 2013;63(608):e200-e08. doi:  
35  
36 10.3399/bjgp13X664252  
37  
38  
39 57. NIHR Dissemination Centre. Improving care by using patient feedback. In: Maxwell E, Lamont T,  
40  
41 eds. NIHR Themed Review: National Institute for Health Research, 2019.  
42  
43 58. Woodcock T, Liberati EG, Dixon-Woods M. A mixed-methods study of challenges experienced by  
44  
45 clinical teams in measuring improvement. *BMJ Qual Saf* 2019 doi: 10.1136/bmjqs-2018-  
46  
47 009048  
48  
49  
50 59. Russell LM, Dawda P. Patient safety in primary care: more data and more action needed. *MJA*  
51  
52 2015;202(2):72-3. doi: 10.5694/mja14.00964  
53  
54  
55 60. Makeham M. Primary health networks - a new home for patient safety in primary care? *Health*  
56  
57 *Voices* 2015;16:19-20.  
58  
59  
60

- 1  
2  
3 61. Benneyan JC, Lloyd RC, Plsek PE. Statistical process control as a tool for research and healthcare  
4  
5 improvement. *Qual Saf Health Care* 2003;12(6):458-64. doi: 10.1136/qhc.12.6.458  
6  
7  
8 62. Fretheim A, Tomic O. Statistical process control and interrupted time series: a golden  
9  
10 opportunity for impact evaluation in quality improvement. *BMJ Qual Saf* 2015;24(12):748-  
11  
12 52. doi: 10.1136/bmjqs-2014-003756  
13  
14 63. Poots AJ, Reed JE, Woodcock T, et al. How to attribute causality in quality improvement: lessons  
15  
16 from epidemiology. *BMJ Qual Saf* 2017;26(11):933-37. doi: 10.1136/bmjqs-2017-006756  
17  
18  
19 64. McNicholas C, Lennox L, Woodcock T, et al. Evolving quality improvement support strategies to  
20  
21 improve Plan-Do-Study-Act cycle fidelity: a retrospective mixed-methods study. *BMJ Qual*  
22  
23 *Saf* 2019;28(5):356-65.  
24  
25  
26 65. Esmail A. Measuring and monitoring safety: a primary care perspective. Thought paper. London:  
27  
28 The Health Foundation, 2013.  
29  
30 66. Hanskamp-Sebregts M, Zegers M, Vincent C, et al. Measurement of patient safety: a systematic  
31  
32 review of the reliability and validity of adverse event detection with record review. *BMJ*  
33  
34 *Open* 2016;6(8):e011078. doi: 10.1136/bmjopen-2016-011078  
35  
36  
37 67. Knight AW, Caesar C, Ford D, et al. Improving primary care in Australia through the Australian  
38  
39 Primary Care Collaboratives Program: a quality improvement report. *BMJ Qual Saf* 2012 doi:  
40  
41 10.1136/bmjqs-2011-000165  
42  
43  
44 68. Carson-Stevens A, Hibbert P, Williams H, et al. Characterising the nature of primary care patient  
45  
46 safety incident reports in the England and Wales National Reporting and Learning System: a  
47  
48 mixed-methods agenda-setting study for general practice. Southampton (UK): NIHR Journals  
49  
50 Library 2016.  
51  
52  
53  
54  
55  
56  
57  
58  
59  
60

**Table 1. Key participant quotes corresponding to feasibility measures**

| Feasibility measure | Theme                                       | Sub-theme                                                                      | Participant quote                                                                                                                                                                                                                                                                                                                                                                                                             |
|---------------------|---------------------------------------------|--------------------------------------------------------------------------------|-------------------------------------------------------------------------------------------------------------------------------------------------------------------------------------------------------------------------------------------------------------------------------------------------------------------------------------------------------------------------------------------------------------------------------|
| Acceptability       | Attitude towards patient feedback on safety | Value patient feedback on safety                                               | <p>"It's always, the valuable ones are always the awful ones, aren't they? You know... it's really precious. Ain't often people are honest like that..." (GP, Practice D, APM)</p> <p>"It's better to be informed about it so that you can make that change...it makes it more positive for everybody then"...(Administration Staff, Practice E, APM)</p>                                                                     |
|                     |                                             | Patient feedback on safety aligned with staff awareness of issues              | "the bits that were flagged that were in there [feedback report] were probably what we expected ..." (PN, Practice D, APM).                                                                                                                                                                                                                                                                                                   |
|                     |                                             | Believability of the feedback                                                  | "And I accept the [safety incident] one, because, perception is truth." (GP, Practice B, APM).                                                                                                                                                                                                                                                                                                                                |
|                     |                                             | Concern and empathy towards patient feedback                                   | <p>"... there's one [safety incident] I was actually concerned, there's a patient who obviously feels that we haven't done our best by them." (PM, Practice A, APM).</p> <p>"So someone had a blocked airway. That sounds really terrible, doesn't it? It's [an] emergency." (PN, Practice A, APM).</p>                                                                                                                       |
|                     |                                             | Surprised or unsure how to respond when feedback differed to staff perceptions | <p>"I thought we have got some more negative feedback from people, which surprised me." (PN1, Practice C, APM).</p> <p>"But I'm not quite sure about that [safety incident] one... I found that one very odd, because... probably some of the best staff we have are down that end of the building, without being horrible to others, but the doctors even say that. I just find that really odd." (PM, Practice B, APM).</p> |
|                     |                                             | Dismissive towards patient feedback                                            | "I think sometimes it's that lack of understanding, that they [GP] can't come and fix the world in fifteen minutes" (PN1, Practice C, APM).                                                                                                                                                                                                                                                                                   |

| Feasibility measure                                                  | Theme                                  | Sub-theme                                                                        | Participant quote                                                                                                                                                                                                                                                                                                                                                                                                                                                                                                |
|----------------------------------------------------------------------|----------------------------------------|----------------------------------------------------------------------------------|------------------------------------------------------------------------------------------------------------------------------------------------------------------------------------------------------------------------------------------------------------------------------------------------------------------------------------------------------------------------------------------------------------------------------------------------------------------------------------------------------------------|
|                                                                      | Using patient feedback to make changes |                                                                                  | “when you get that: ‘I can’t see the doctor that I want to see’ [patient comment]. Well we’ve been working on this for five years trying to improve things!” (PM, Practice D, Final Interview)                                                                                                                                                                                                                                                                                                                   |
|                                                                      |                                        | Cautious about using patient feedback for safety improvement                     | “But we need to... you know, decide on what, what we think's important to change... and what's changeable. And I don't think we can do anything about this [safety incident].” (GP, Practice A, APM)                                                                                                                                                                                                                                                                                                             |
|                                                                      |                                        | Largely positive feedback limited staff response                                 | “We didn’t have too many negatives [feedback] which is a good thing but also, it was sort of, well do we need to change that much?” (PM, Practice A, Final interview)                                                                                                                                                                                                                                                                                                                                            |
|                                                                      |                                        | Using staff identified areas of service improvement rather than patient feedback | “...even though it's not, it's not showing up as negative as I thought it might've, so I was really happy about that, but I think the appointment system will still [need to be addressed]... And I think that will assist the, there's less likely to be an error. So there's less likely to be a, ah, negative outcome for the patient” (PM, Practice A, APM).                                                                                                                                                 |
| Barriers and enablers to intervention development and implementation | Developing interventions               | Intuitive problem solving process                                                | <p>“We're probably doing it anyway, but we don't realize it's a model for improvement.” (PN2, Practice C, Final interview)</p> <p>“So we [other administration staff] we probably collaborate a lot. We throw ideas around. You know how to do different things. So we're probably the thinkers.” (Admin, Practice F, Final interview)</p>                                                                                                                                                                       |
|                                                                      |                                        | Disconnect between staff problem solving process and Mfl framework               | <p>“It was a good framework. Initially, what we found was when barriers kind of ah developed, we had trouble readjusting to that [Mfl framework].” (GP, Practice F, Final interview)</p> <p>“I didn't ever use a model I was just sort of like, “This is what I'm trying to achieve. This is how I'm going to do it”... Did it work? Didn't it work? Which is probably the same model, but I just didn't actually outline it or ever document it. It was just in my head.” (PN, Practice D, Final Interview)</p> |

| Feasibility measure  | Theme                                                                                                                                                                                       | Sub-theme                                                                                                                                                                                      | Participant quote                                                                                                                                                                                                                                                                                                                                                                                                                                                                                         |
|----------------------|---------------------------------------------------------------------------------------------------------------------------------------------------------------------------------------------|------------------------------------------------------------------------------------------------------------------------------------------------------------------------------------------------|-----------------------------------------------------------------------------------------------------------------------------------------------------------------------------------------------------------------------------------------------------------------------------------------------------------------------------------------------------------------------------------------------------------------------------------------------------------------------------------------------------------|
|                      |                                                                                                                                                                                             |                                                                                                                                                                                                | <p>“We are not very keen of formally doing that [sic.] things [MFI]. The simple the better.” (GP, Practice E, Final Interview)</p> <p>“...we probably were never really good at documenting that stuff. Document ... as I said, in here you're kind of doing things on the run, do you know what I mean? You go, "Oh yeah, we'll do that."” (PM, Practice E, Final Interview)</p>                                                                                                                         |
|                      |                                                                                                                                                                                             | Integrating and adapting problem solving approaches                                                                                                                                            | <p>“[The model for improvement] is a good process and it's simple but sometimes we complicate it by making it bigger than what it is” (PN1, Practice C, Final Interview).</p> <p>“ ... [we] do the PDSA cycle, not necessarily super formally but we just, we identify what needs to be done and we try to make our changes small not big and then we introduce those to the practice or to specific members of the practice team who might need to know about it.” (GP, Practice A, Final Interview)</p> |
|                      | Implementing interventions                                                                                                                                                                  | Multidisciplinary team                                                                                                                                                                         | <p>“I just figured that it would end up falling probably on the three of us [PM, PN, Admin]. Because I knew [GP] was going to be time poor... So he was there if we needed him and we would bug him.’ (PM, Practice B, Final Interview)</p>                                                                                                                                                                                                                                                               |
|                      | Staff responsibility and ownership for intervention linked to type of improvement activity                                                                                                  | <p>“I like data. I like playing with data [laughter]. I enjoyed doing a lot of the collection and stuff and seeing what you can do to make it happen...” (PM, Practice C, Final Interview)</p> |                                                                                                                                                                                                                                                                                                                                                                                                                                                                                                           |
|                      | Difficulty in measuring change in safety outcomes                                                                                                                                           | <p>‘It is difficult to measure outcome because if you prevent a complication, it [is] what it is’ (GP, Practice E, Workshop 2)</p>                                                             |                                                                                                                                                                                                                                                                                                                                                                                                                                                                                                           |
| Use of soft measures | <p>“...because there were things that we couldn't really kind of quantify. I mean, how do you quantify [staff member] stress level based on one particular aspect and you know separate</p> |                                                                                                                                                                                                |                                                                                                                                                                                                                                                                                                                                                                                                                                                                                                           |

| Feasibility measure | Theme | Sub-theme                                             | Participant quote                                                                                                                                                                                                                                                                                                                                                                                                                                                                                                                                                                                                                 |
|---------------------|-------|-------------------------------------------------------|-----------------------------------------------------------------------------------------------------------------------------------------------------------------------------------------------------------------------------------------------------------------------------------------------------------------------------------------------------------------------------------------------------------------------------------------------------------------------------------------------------------------------------------------------------------------------------------------------------------------------------------|
|                     |       |                                                       | it from...? That was what we had trouble with, more than anything.” (GP, Practice F, Final Interview)                                                                                                                                                                                                                                                                                                                                                                                                                                                                                                                             |
|                     |       | Staff support and engagement                          | “Nobody wanted to be part of the safety improvement team, like, as soon as [you] mention anything like this, everyone’s just like [pause] ‘Not again’.” (PM, Practice D, Workshop 2).                                                                                                                                                                                                                                                                                                                                                                                                                                             |
|                     |       | Time and resources                                    | <p>“I felt as though we could have actually used a, ‘Alright, what's going wrong? Let's troubleshoot this and see.’ I don't think as a team, we were able to devote the time or the resources or energy to actually do that when we hit those barriers.” (GP, Practice F, Final Interview)</p> <p>‘A lot's changed in the practice since we [started the trial]. A lot of fairly massive things. We've taken on 50% more students, we've got a few more extra learners, we've got a few other things going on plus we've had just some stuff, health issues, which have had a huge impact.’ (GP, Practice A, Final Interview)</p> |
| Trail scalability   |       | Increased facilitation and support from research team | <p>“I think the workshops were valuable. I don't know whether we can just blame the [intervention barriers], I suppose our lack of engagement with [the intervention]. Maybe if we had to engage a little bit more, it probably would have kept us on track a bit more I think... even if it was just on the phone or something.” (PM, Practice D, Final Interview)</p> <p>“I think you need somebody that's there as the overseer to keep us on track.” (PM, Practice B, Final interview).</p>                                                                                                                                   |
|                     |       | Real-time electronic patient feedback processes       | “Something electronic I think we’d definitely be interested in. Even things, like the emails and text messages and stuff to people after they've been to their appointment, people don't have to do them then and there. They can sit on their couch at home and do it at night when they've actually got time... I would imagine we would get different feedback if patients were being surveyed after their appointment.” (PM, Practice D, Final interview).                                                                                                                                                                    |

1  
2  
3 PM: Practice Manager

4  
5 PN: Practice Nurse

6  
7 GP: General Practitioner

8  
9 APM: Action Planning Meeting

10  
11 Workshop 2: Participant recording during discussions from Workshop 2

12  
13 MFI: Model for Improvement

14  
15  
16  
17  
18  
19  
20  
21  
22  
23  
24  
25  
26  
27  
28  
29  
30  
31  
32  
33  
34  
35  
36  
37  
38  
39  
40  
41  
42  
43  
44  
45  
46

For peer review only

Table 2. Patient demographic characteristics

|                                                     | Practice A |    | Practice B |            | Practice C |           | Practice D |            | Practice E |            | Practice F |            | Total      |             |
|-----------------------------------------------------|------------|----|------------|------------|------------|-----------|------------|------------|------------|------------|------------|------------|------------|-------------|
|                                                     | T1         | T2 | T1         | T2         | T1         | T2        | T1         | T2         | T1         | T2         | T1         | T2         | T1         | T2          |
| Gender (n)                                          | 99         | -  | 195        | 197        | 141        | 150       | 128        | 142        | 146        | 155        | 113        | 257        | 822        | 901         |
| Male (n, %)                                         | 24 (24.2)  | -  | 48 (24.6)  | 62 (31.5)  | 67 (47.5)  | 71 (47.3) | 24 (18.8)  | 29 (20.4)  | 43 (29.5)  | 51 (32.9)  | 35 (31.0)  | 97 (37.7)  | 241 (29.3) | 310 (35.4)* |
| Female (n, %)                                       | 75 (75.8)  | -  | 147 (75.4) | 135 (68.5) | 74 (52.5)  | 79 (52.7) | 104 (81.3) | 113 (79.6) | 103 (70.5) | 104 (67.1) | 78 (69.0)  | 160 (62.3) | 581 (70.7) | 591 (65.6)  |
| Age (mean, SD)                                      | 53 (17.2)  | -  | 55 (17.2)  | 55 (18.4)  | 63 (16.8)  | 61 (17.7) | 47 (17.7)  | 50 (18.6)  | 57 (18.9)  | 59 (18.1)  | 55 (17.4)  | 54 (17.7)  | 55 (18.1)  | 56 (18.3)   |
| Visits to practice in previous 12 months (mean, SD) | 13 (15.9)  | -  | 7 (5.9)    | 8 (5.9)*   | 7 (5.8)    | 8 (11.0)  | 8 (9.4)    | 9 (9.3)    | 7 (6.1)    | 8 (10.1)   | 8 (5.7)    | 8 (7.8)    | 8 (8.5)    | 8 (8.7)     |

\* Statistically significant difference between baseline and 6 months  $p < 0.05$

T1= Time 1 (Baseline)

T2 = Time 2 (6 months post intervention period)



**Table 3. PC PMOS overall and domain specific scores by practice**

|                                          | Practice A     |    | Practice B     |                   | Practice C     |                  | Practice D     |                | Practice E     |                  | Practice F     |                  | Total          |                   |
|------------------------------------------|----------------|----|----------------|-------------------|----------------|------------------|----------------|----------------|----------------|------------------|----------------|------------------|----------------|-------------------|
|                                          | T1             | T2 | T1             | T2                | T1             | T2               | T1             | T2             | T1             | T2               | T1             | T2               | T1             | T2                |
| PC PMOS mean score (SD)                  | 4.22<br>(0.67) | -  | 4.29<br>(0.46) | 4.46 **<br>(0.40) | 4.26<br>(0.50) | 4.36<br>(0.46)   | 4.44<br>(0.42) | 4.47<br>(0.44) | 4.24<br>(0.49) | 4.26<br>(0.49)   | 4.36<br>(0.40) | 4.32<br>(0.52)   | 4.30<br>(0.49) | 4.37 *<br>(0.47)  |
| Access Mean (SD)                         | 3.94<br>(0.84) | -  | 4.12<br>(0.64) | 4.38 **<br>(0.60) | 4.03<br>(0.67) | 4.26 *<br>(0.67) | 4.24<br>(0.71) | 4.29<br>(0.67) | 4.01<br>(0.76) | 4.07<br>(0.75)   | 4.16<br>(0.68) | 4.15<br>(0.76)   | 4.09<br>(0.71) | 4.23 **<br>(0.70) |
| Communication Mean (SD)                  | 4.37<br>(0.64) | -  | 4.41<br>(0.50) | 4.56 *<br>(0.47)  | 4.40<br>(0.52) | 4.47<br>(0.56)   | 4.60<br>(0.45) | 4.60<br>(0.47) | 4.37<br>(0.57) | 4.44<br>(0.53)   | 4.51<br>(0.46) | 4.45<br>(0.58)   | 4.44<br>(0.53) | 4.50 *<br>(0.53)  |
| External policy environment Mean (SD)    | 4.18<br>(0.82) | -  | 4.00<br>(0.88) | 4.16<br>(0.90)    | 4.05<br>(0.97) | 4.08<br>(1.04)   | 4.07<br>(1.08) | 4.20<br>(1.00) | 3.97<br>(0.94) | 3.90<br>(1.01)   | 3.94<br>(1.05) | 4.09<br>(1.03)   | 4.03<br>(0.96) | 4.09<br>(1.00)    |
| Information flow Mean (SD)               | 4.18<br>(0.68) | -  | 4.27<br>(0.63) | 4.46 *<br>(0.56)  | 4.26<br>(0.58) | 4.42 *<br>(0.59) | 4.42<br>(0.61) | 4.41<br>(0.68) | 4.18<br>(0.67) | 4.29<br>(0.61)   | 4.31<br>(0.61) | 4.25<br>(0.68)   | 4.27<br>(0.63) | 4.36 *<br>(0.63)  |
| Organisation and care planning Mean (SD) | 4.37<br>(0.55) | -  | 4.27<br>(0.61) | 4.47 *<br>(0.62)  | 4.36<br>(0.56) | 4.37<br>(0.57)   | 4.36<br>(0.54) | 4.44<br>(0.49) | 4.29<br>(0.53) | 4.30<br>(0.66)   | 4.45<br>(0.56) | 4.36<br>(0.65)   | 4.34<br>(0.56) | 4.39<br>(0.61)    |
| Patient related factors Mean (SD)        | 4.45<br>(0.78) | -  | 4.45<br>(0.65) | 4.69 **<br>(0.54) | 4.49<br>(0.70) | 4.56<br>(0.71)   | 4.63<br>(0.60) | 4.75<br>(0.53) | 4.48<br>(0.58) | 4.51<br>(0.73)   | 4.60<br>(0.57) | 4.57<br>(0.65)   | 4.51<br>(0.65) | 4.61 *<br>(0.64)  |
| Physical environment Mean (SD)           | 4.47<br>(0.69) | -  | 4.48<br>(0.53) | 4.65 *<br>(0.49)  | 4.58<br>(0.55) | 4.57<br>(0.58)   | 4.60<br>(0.51) | 4.63<br>(0.58) | 4.47<br>(0.59) | 4.50<br>(0.60)   | 4.64<br>(0.48) | 4.47 *<br>(0.66) | 4.54<br>(0.56) | 4.56<br>(0.59)    |
| Referral systems Mean (SD)               | 4.38<br>(0.6)  | -  | 4.37<br>(0.56) | 4.53 *<br>(0.54)  | 4.34<br>(0.57) | 4.41<br>(0.59)   | 4.59<br>(0.54) | 4.60<br>(0.55) | 4.41<br>(0.49) | 4.45<br>(0.56)   | 4.48<br>(0.53) | 4.43<br>(0.65)   | 4.42<br>(0.55) | 4.48<br>(0.59)    |
| Task performance Mean (SD)               | 4.04<br>(0.93) | -  | 4.10<br>(0.96) | 4.10<br>(1.17)    | 4.00<br>(0.99) | 4.01<br>(1.12)   | 4.36<br>(0.84) | 4.20<br>(0.95) | 3.97<br>(0.97) | 3.70 *<br>(1.15) | 3.85<br>(1.11) | 4.02<br>(0.94)   | 4.06<br>(0.98) | 4.01<br>(1.07)    |

T1= Time 1 (Baseline)

T2 = Time 2 (6 months post intervention period)

\* p&lt;0.05

\*\* p&lt;0.001

Table 4. Frequency, preventability and severity of patient-reported incidents and concerns

|                                                                            | Practice A             |    | Practice B               |    | Practice C                                   |                                  | Practice D |    | Practice E             |                      | Practice F             |                        | Total                  |                      |
|----------------------------------------------------------------------------|------------------------|----|--------------------------|----|----------------------------------------------|----------------------------------|------------|----|------------------------|----------------------|------------------------|------------------------|------------------------|----------------------|
|                                                                            | T1                     | T2 | T1                       | T2 | T1                                           | T2                               | T1         | T2 | T1                     | T2                   | T1                     | T2                     | T1                     | T2                   |
| No. of patient reported incidents†                                         | 1                      | -  | 4                        | 0  | 2                                            | 2                                | 0          | 0  | 3                      | 3                    | 1                      | 4                      | 11                     | 9                    |
| Average preventability rating (range)‡                                     | Definitely preventable | -  | Probably not preventable | -  | Definitely preventable, Probably preventable | Probably preventable, Don't know | -          | -  | Definitely preventable | Probably preventable | Definitely preventable | Definitely preventable | Definitely preventable | Probably preventable |
| Average severity rating (range)^                                           | 10 (10)                | -  | 7.3 (6-8)                | -  | 6.5 (3-10)                                   | 8.5 (7-10)                       | -          | -  | 6.7 (6-8)              | 6.3 (6-7)            | 9 (9)                  | 7.6 (7-9)              | 7.4 (3-10)             | 7.4 (6-10)           |
| No. of patient reported concerns#                                          | 6                      | -  | 13                       | 6  | 9                                            | 3                                | 2          | 2  | 8                      | 6                    | 4                      | 8                      | 42                     | 25                   |
| No. of patient reported concerns that were classified as safety incidents~ | 3                      | -  | 7                        | 3  | 1                                            | 1                                | 1          | 2  | 3                      | 3                    | 2                      | 3                      | 17                     | 12                   |

† Patient reported incidents using Patient Incident Reporting Tool

‡ Preventability scale consists of five options 'Definitely preventable', 'Probably preventable', 'Probably not preventable', 'Definitely not preventable', and 'Don't know'. Expressed as the median due to it being an ordinal variable.

^ Patient-rated severity scale is 1-10 with 1=not serious at all and 10=extremely serious.

# Patient reported concerns mentioned in 'other comments' section of the survey (total number of negative comments)

~ Patient reported incidents mentioned in the 'other comments' section of the survey (PISA classification system was used to classify safety incidents<sup>68</sup>)

T1= Time 1 (Baseline)

T2 = Time 2 (6 months post intervention period)

**Box 1. Recommendations for intervention improvement**

- Simplification of intervention framework
- Structured and defined intervention actions plans and corresponding safety measures for each of the PC PMOS domains of safety
- Electronic data collection platforms to enable real-time patient feedback
- Increased external intervention facilitation
- Modification to questionnaire collecting patient reported safety incidents

peer review only

1  
2  
3  
4  
5  
6  
7  
8  
9  
10  
11  
12  
13  
14  
15  
16  
17  
18  
19  
20  
21  
22  
23  
24  
25  
26  
27  
28  
29  
30  
31  
32  
33  
34  
35  
36  
37  
38  
39  
40  
41  
42  
43  
44  
45  
46

**Figure legend**

**Figure 1. Intervention phases**

For peer review only

Figure 1. Intervention phases

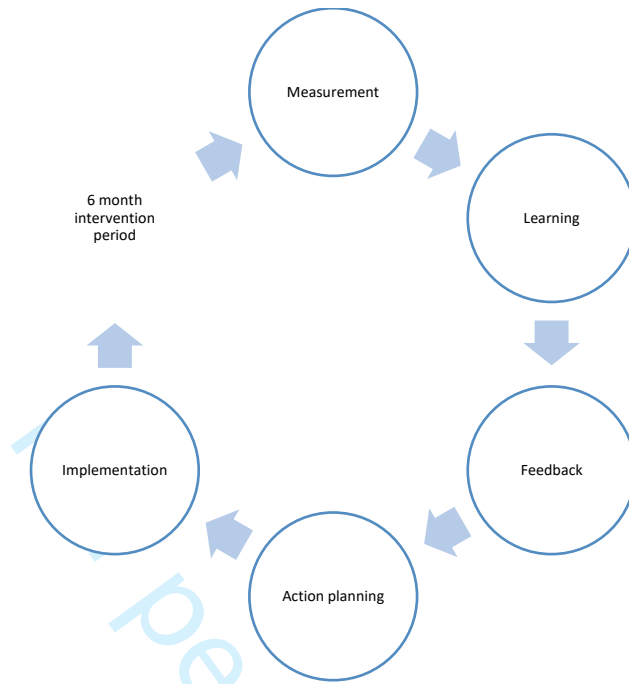

## Appendix 1. Practice profile summary

|                                      | Practice A      | Practice B      | Practice C      | Practice D   | Practice E             | Practice F |
|--------------------------------------|-----------------|-----------------|-----------------|--------------|------------------------|------------|
| Estimated number of unique patients  | 9106            | 12000           | N/A             | 7232         | 3200                   | 21725      |
| Estimated patient gender (%)         |                 |                 |                 |              |                        |            |
| Male                                 | 40.79           | 45              | 50              | 47.91        | 45                     | 46         |
| Female                               | 54.5            | 55              | 50              | 50.28        | 55                     | 54         |
| Other or not recorded                | 4.71            | 0               | 0               | 1.8          | 0                      | 0          |
| Estimated age distribution (%)       |                 |                 |                 |              |                        |            |
| Birth – 10 years                     | 10.1            | 9               | 8.58            | 13.7         | 8.1                    | 11         |
| 11 – 18 years                        | 8.2             | 6               | 8.30            | 9.9          | 10.7                   | 13         |
| 19 – 45 years                        | 34.3            | 26              | 24.02           | 35.8         | 25.7                   | 32         |
| 46 – 64 years                        | 26.9            | 29              | 27.36           | 24.1         | 31.7                   | 27         |
| 65 – 79 years                        | 15.2            | 21              | 22.13           | 11.9         | 17.1                   | 11         |
| 80+ years                            | 5.3             | 9               | 9.60            | 4.6          | 6.3                    | 6          |
| Number of patients seen per week     | N/A             | 850             | 271             | 326          | 245                    | 1408       |
| Number of patients seen per month    | N/A             | 3624            | 1084            | 1030         | N/A                    | 5471       |
| Number of new patients last month    | N/A             | 69              | 50              | 58           | N/A                    | 180        |
| Number of consultations per week     | 576             | 1584            | 454             | 393          | 245                    | 1260       |
| Number of consultations per month    | 2148            | 5832            | 1816            | 1809         | N/A                    | 5216       |
| Top 5 patient diagnosis / conditions | Mental health   | Hypertension    | Hypertension    | Hypertension | Diabetes               | Obesity    |
|                                      | Musculoskeletal | Hyperlipidaemia | Hyperlipidaemia | Asthma       | Ischemic heart disease | Diabetes   |

|                                                          | Practice A                                                                                                               | Practice B                                                                                                                              | Practice C                                                                                                                                            | Practice D                                                                  | Practice E                                                                               | Practice F                                                       |
|----------------------------------------------------------|--------------------------------------------------------------------------------------------------------------------------|-----------------------------------------------------------------------------------------------------------------------------------------|-------------------------------------------------------------------------------------------------------------------------------------------------------|-----------------------------------------------------------------------------|------------------------------------------------------------------------------------------|------------------------------------------------------------------|
|                                                          | Skin problems                                                                                                            | Asthma                                                                                                                                  | Osteoarthritis                                                                                                                                        | Depression                                                                  | Hypertension                                                                             | Asthma                                                           |
|                                                          | Diabetes                                                                                                                 | Depression                                                                                                                              | Asthma                                                                                                                                                | Hypercholesterolaemia / hyperlipidaemia                                     | Osteoarthritis                                                                           | Hypertension                                                     |
|                                                          | Ischemic heart disease                                                                                                   | Diabetes                                                                                                                                | Depression                                                                                                                                            | Osteoarthritis                                                              | Renal disease                                                                            | Dyslipidemia                                                     |
| General Practitioners (Number/FTE)                       | 8/6                                                                                                                      | -/12                                                                                                                                    | 3/3                                                                                                                                                   | 6/4.5                                                                       | -/3                                                                                      | 12/-                                                             |
| Practice Nurses (Number/FTE)                             | 5/-                                                                                                                      | -/4                                                                                                                                     | 3/1.96                                                                                                                                                | 4/1.6                                                                       | -/1                                                                                      | -/3.9                                                            |
| Reception / Administration staff (Number/FTE)            | 7/-                                                                                                                      | -/13                                                                                                                                    | 6/2.54                                                                                                                                                | 5/3.5                                                                       | -/2.5                                                                                    | -/9.8                                                            |
| Practice Manager (Number/FTE)                            | 1/-                                                                                                                      | -/1                                                                                                                                     | 1/-                                                                                                                                                   | 1/0.8                                                                       | -/0.8                                                                                    | 1/-                                                              |
| Medical students (Number/FTE)                            | N/A                                                                                                                      | N/A                                                                                                                                     | 1/1                                                                                                                                                   | N/A                                                                         | N/A                                                                                      | N/A                                                              |
| General Practitioner Average consultation time (minutes) | 20                                                                                                                       | 15                                                                                                                                      | 20                                                                                                                                                    | 23                                                                          | 25                                                                                       | 15                                                               |
| Practice Nurse Average consultation time (minutes)       | 30                                                                                                                       | 30                                                                                                                                      | 15                                                                                                                                                    | 30                                                                          | 20                                                                                       | 15                                                               |
| Additional services offered at practice                  | Physiotherapy, Podiatry, Psychologist/counseling, Youth mental health service, Speech Pathologist, Exercise physiologist | Psychologists, Psychotherapist, Men's health clinic, Chronic disease management, Dietician, Diabetic educator, CVC program, neurologist | Dietitian, Psychiatrist, Podiatry, Australian Hearing – Audio screening, Video conferencing – specialist, Visiting specialists consulting at clinic – | Physiotherapy, Psychology, Dentist, Audiology, Visiting Physicians/surgeons | Osteopath, Chiropractor, Australian Hearing, Psychologist, General surgeon consultations | Diabetes Educator(s), Dietitian, Podiatrist, Mental health nurse |

|                                             | Practice A                                                                                                 | Practice B                                                                                                                                                                                                                               | Practice C                                                                                                                                                                                                           | Practice D | Practice E                                                                                                                                                              | Practice F                                                                                                                                                                          |
|---------------------------------------------|------------------------------------------------------------------------------------------------------------|------------------------------------------------------------------------------------------------------------------------------------------------------------------------------------------------------------------------------------------|----------------------------------------------------------------------------------------------------------------------------------------------------------------------------------------------------------------------|------------|-------------------------------------------------------------------------------------------------------------------------------------------------------------------------|-------------------------------------------------------------------------------------------------------------------------------------------------------------------------------------|
|                                             |                                                                                                            |                                                                                                                                                                                                                                          | Paediatrics,<br>orthopaedic,<br>Surgeon – general,<br>Physician, Oncology                                                                                                                                            |            |                                                                                                                                                                         |                                                                                                                                                                                     |
| Accreditation status /<br>year              | Yes / 2018                                                                                                 | Yes / 2018                                                                                                                                                                                                                               | Yes / 2018                                                                                                                                                                                                           | Yes / 2017 | Yes / 2018                                                                                                                                                              | Yes / 2018                                                                                                                                                                          |
| Past safety and quality<br>improvement work | <ul style="list-style-type: none"> <li>• Participation in Collaboratives (2013) – Diabetes wave</li> </ul> | <ul style="list-style-type: none"> <li>• Improvement foundation workshops for chronic kidney disease and diabetes</li> <li>• Closing the gap for ATSI patients</li> <li>• Research study investigating aspirin in the elderly</li> </ul> | <ul style="list-style-type: none"> <li>• Participation in Collaboratives Wave 10</li> <li>• Research studies investigating aspirin in the elderly, mental health, mothers health, bowel cancer prevention</li> </ul> | N/A        | <ul style="list-style-type: none"> <li>• Participation in Collaboratives – Wave 9 – Diabetes</li> <li>• 2018 – Practice Accreditation and Improvement Survey</li> </ul> | <ul style="list-style-type: none"> <li>• Participation in Collaboratives wave projects – Cardiovascular disease &amp; Chronic kidney disease and Improving Diabetes care</li> </ul> |

FTE: Full Time Equivalent

N/A: Not available



## Appendix 2. Crude response rate calculation

|                                                                                        | Practice B |      | Practice C |      | Practice D |      | Practice E |      | Practice F |      | Total |      |
|----------------------------------------------------------------------------------------|------------|------|------------|------|------------|------|------------|------|------------|------|-------|------|
|                                                                                        | T1         | T2   | T1    | T2   |
| Patients completing PC PMOS                                                            | 198        | 197  | 148        | 153  | 130        | 145  | 150        | 158  | 113        | 258  | 739   | 911  |
| All patients presenting for appointment during data collection timeframes <sup>†</sup> | 392        | 489  | 278        | 170  | 550        | 637  | 316        | 220  | 4136       | 8262 | 5672  | 9778 |
| Response rate (%)                                                                      | 50.5       | 40.3 | 53.2       | 90.0 | 23.6       | 22.8 | 47.5       | 71.8 | 2.7        | 3.1  | 13.0  | 9.3  |

† Data on patients presenting for their appointment was extracted for 5 out of the 6 practices using Pen CS software for general practice clinics. Due to data unavailability for one practice, the response rate calculation is a crude estimate only.

T1= Time 1 (Baseline)

T2 = Time 2 (6 months post intervention period)

| T1 and T2 combined | Patients completing PC PMOS (n=1,650) | All patients presenting for appointment during data collection timeframes (n=15,450) <sup>†</sup> |
|--------------------|---------------------------------------|---------------------------------------------------------------------------------------------------|
| Gender (n)         |                                       |                                                                                                   |
| Male (n, %)        | 527 (32.5%)                           | 6701 (43.5%)                                                                                      |
| Female (n, %)      | 1097 (67.5%)                          | 8706 (56.5%)*                                                                                     |
| Age (mean, SD)     | 55.5 (18.2)                           | 48.3 (24.6)*                                                                                      |

\* Statistically significant difference  $p=0.000$

Patients completing the PC PMOS were significantly more likely to be older and female.

1  
2  
3  
4  
5  
6  
7  
8  
9  
10  
11  
12  
13  
14  
15  
16  
17  
18  
19  
20  
21  
22  
23  
24  
25  
26  
27  
28  
29  
30  
31  
32  
33  
34  
35  
36  
37  
38  
39  
40  
41  
42  
43  
44  
45  
46

**Appendix 3. Staff percent positive scores of patient safety culture**

|                                                              | Practice A |           | Practice B |           | Practice C |           | Practice D |           | Practice E |           | Practice F |           | Total     |           |
|--------------------------------------------------------------|------------|-----------|------------|-----------|------------|-----------|------------|-----------|------------|-----------|------------|-----------|-----------|-----------|
|                                                              | T1 % (SD)  | T2 % (SD) | T1 % (SD) | T2 % (SD) |
| Safety culture composites                                    |            |           |            |           |            |           |            |           |            |           |            |           |           |           |
| Communication About Error                                    | 91 (0.2)   | -         | 64 (0.3)   | 50 (0.3)  | 69 (0.2)   | 72 (0.3)  | 94 (0.2)   | 97 (0.1)  | 75 (0.4)   | 75 (0.4)  | 58 (0.4)   | 55 (0.4)  | 72 (0.3)  | 65 (0.3)  |
| Communication Openness                                       | 81 (0.2)   | -         | 66 (0.3)   | 47 (0.4)  | 72 (0.3)   | 64 (0.5)  | 97 (0.1)   | 97 (0.1)  | 70 (0.3)   | 79 (0.3)  | 50 (0.4)   | 50 (0.4)  | 71 (0.3)  | 61 (0.4)  |
| Office Processes and Standardisation                         | 63 (0.2)   | -         | 75 (0.2)   | 66 (0.3)  | 69 (0.3)   | 58 (0.4)  | 91 (0.2)   | 97 (0.1)  | 75 (0.3)   | 83 (0.2)  | 64 (0.3)   | 55 (0.4)  | 73 (0.3)  | 69 (0.3)  |
| Organisational Learning                                      | 100 (0.0)  | -         | 70 (0.4)   | 59 (0.4)  | 70 (0.4)   | 59 (0.5)  | 92 (0.2)   | 74 (0.4)  | 67 (0.5)   | 61 (0.5)  | 33 (0.4)   | 58 (0.3)  | 71 (0.4)  | 61 (0.4)  |
| Overall Perceptions of Patient Safety and Quality            | 72 (0.3)   | -         | 69 (0.4)   | 58 (0.4)  | 72 (0.4)   | 53 (0.5)  | 94 (0.1)   | 78 (0.4)  | 75 (0.4)   | 79 (0.4)  | 39 (0.4)   | 61 (0.3)  | 69 (0.4)  | 63 (0.4)  |
| Owner/Managing Partner/Leadership Support for Patient Safety | 28 (0.4)   | -         | 68 (0.4)   | 50 (0.4)  | 61 (0.4)   | 67 (0.4)  | 56 (0.5)   | 89 (0.3)  | 85 (0.2)   | 91 (0.2)  | 31 (0.4)   | 41 (0.4)  | 56 (0.4)  | 61 (0.4)  |
| Patient Care Tracking/Follow-up                              | 75 (0.4)   | -         | 61 (0.4)   | 61 (0.4)  | 92 (0.1)   | 89 (0.3)  | 91 (0.2)   | 92 (0.1)  | 90 (0.2)   | 75 (0.2)  | 69 (0.4)   | 64 (0.3)  | 75 (0.3)  | 72 (0.3)  |
| Staff Training                                               | 92 (0.2)   | -         | 83 (0.2)   | 85 (0.3)  | 82 (0.4)   | 70 (0.4)  | 83 (0.4)   | 96 (0.1)  | 80 (0.3)   | 89 (0.2)  | 70 (0.4)   | 52 (0.4)  | 82 (0.3)  | 78 (0.3)  |
| Teamwork                                                     | 94 (0.2)   | -         | 85 (0.2)   | 75 (0.3)  | 89 (0.1)   | 53 (0.3)* | 100 (0.0)  | 100 (0.0) | 90 (0.1)   | 92 (0.1)  | 86 (0.2)   | 89 (0.2)  | 89 (0.2)  | 80 (0.3)* |
| Work Pressure and Pace                                       | 23 (0.4)   | -         | 58 (0.3)   | 50 (0.4)  | 31 (0.3)   | 58 (0.4)  | 63 (0.3)   | 86 (0.1)* | 55 (0.3)   | 67 (0.3)  | 42 (0.5)   | 41 (0.4)  | 47 (0.4)  | 57 (0.4)  |
| Average Across Composites                                    | 72 (0.2)   | -         | 70 (0.2)   | 60 (0.2)  | 71 (0.2)   | 64 (0.3)  | 86 (0.1)   | 91 (0.1)  | 76 (0.3)   | 79 (0.2)  | 54 (0.2)   | 56 (0.3)  | 71 (0.2)  | 67 (0.2)  |
| Overall Rating on Patient Safety (QG2)                       | 88 (0.4)   | -         | 68 (0.5)   | 68 (0.5)  | 78 (0.4)   | 67 (0.5)  | 88 (0.4)   | 100 (0.0) | 80 (0.5)   | 100 (0.0) | 44 (0.5)   | 55 (0.5)  | 72 (0.5)  | 74 (0.4)  |

\* statistically significant at p<0.05

**Appendix 4. Frequency of safety incidents recorded in practice clinical risk management system**

|              | <b>Baseline</b> | <b>Intervention period</b> |
|--------------|-----------------|----------------------------|
| Practice A   | 3               | 6                          |
| Practice B   | 5               | 1                          |
| Practice C   | 4               | 6                          |
| Practice D   | 4               | 3                          |
| Practice E   | 1               | 0                          |
| Practice F   | 15              | 5                          |
| <b>Total</b> | <b>32</b>       | <b>21</b>                  |

Baseline – number of safety incidents recorded from previous 12 months

Intervention period – number of safety incidents recorded during intervention period

# BMJ Open

## Patient feedback for safety improvement in primary care: Results from a feasibility study

|                                  |                                                                                                                                                                                                                                                                                                                                                                                                                                                                                                                                                                                                                  |
|----------------------------------|------------------------------------------------------------------------------------------------------------------------------------------------------------------------------------------------------------------------------------------------------------------------------------------------------------------------------------------------------------------------------------------------------------------------------------------------------------------------------------------------------------------------------------------------------------------------------------------------------------------|
| Journal:                         | <i>BMJ Open</i>                                                                                                                                                                                                                                                                                                                                                                                                                                                                                                                                                                                                  |
| Manuscript ID                    | bmjopen-2020-037887.R2                                                                                                                                                                                                                                                                                                                                                                                                                                                                                                                                                                                           |
| Article Type:                    | Original research                                                                                                                                                                                                                                                                                                                                                                                                                                                                                                                                                                                                |
| Date Submitted by the Author:    | 05-May-2020                                                                                                                                                                                                                                                                                                                                                                                                                                                                                                                                                                                                      |
| Complete List of Authors:        | Hernan, Andrea; Deakin University, Deakin Rural Health<br>Giles, Sally; <span class="FO_hovorable_search_text">&lt;span class='FO_FirstWord'&gt;University&lt;/span&gt; of Manchester&lt;/span&gt;, NIHR Greater Manchester Primary Care Patient Safety Translational Research Centre<br/>Beks, Hannah; Deakin University, Deakin Rural Health<br/>McNamara, Kevin; Deakin University, Deakin Rural Health<br/>Klot, Kate; Deakin University, Centre for Rural Emergency Medicine<br/>Binder, Marley; Deakin University, Deakin Rural Health<br/>Versace, Vincent; Deakin University, Deakin Rural Health</span> |
| <b>Primary Subject Heading</b> : | General practice / Family practice                                                                                                                                                                                                                                                                                                                                                                                                                                                                                                                                                                               |
| Secondary Subject Heading:       | Health services research                                                                                                                                                                                                                                                                                                                                                                                                                                                                                                                                                                                         |
| Keywords:                        | Quality in health care < HEALTH SERVICES ADMINISTRATION & MANAGEMENT, PRIMARY CARE, QUALITATIVE RESEARCH, HEALTH SERVICES ADMINISTRATION & MANAGEMENT                                                                                                                                                                                                                                                                                                                                                                                                                                                            |
|                                  |                                                                                                                                                                                                                                                                                                                                                                                                                                                                                                                                                                                                                  |

SCHOLARONE™  
Manuscripts

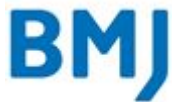

I, the Submitting Author has the right to grant and does grant on behalf of all authors of the Work (as defined in the below author licence), an exclusive licence and/or a non-exclusive licence for contributions from authors who are: i) UK Crown employees; ii) where BMJ has agreed a CC-BY licence shall apply, and/or iii) in accordance with the terms applicable for US Federal Government officers or employees acting as part of their official duties; on a worldwide, perpetual, irrevocable, royalty-free basis to BMJ Publishing Group Ltd ("BMJ") its licensees and where the relevant Journal is co-owned by BMJ to the co-owners of the Journal, to publish the Work in this journal and any other BMJ products and to exploit all rights, as set out in our [licence](#).

The Submitting Author accepts and understands that any supply made under these terms is made by BMJ to the Submitting Author unless you are acting as an employee on behalf of your employer or a postgraduate student of an affiliated institution which is paying any applicable article publishing charge ("APC") for Open Access articles. Where the Submitting Author wishes to make the Work available on an Open Access basis (and intends to pay the relevant APC), the terms of reuse of such Open Access shall be governed by a Creative Commons licence – details of these licences and which [Creative Commons](#) licence will apply to this Work are set out in our licence referred to above.

Other than as permitted in any relevant BMJ Author's Self Archiving Policies, I confirm this Work has not been accepted for publication elsewhere, is not being considered for publication elsewhere and does not duplicate material already published. I confirm all authors consent to publication of this Work and authorise the granting of this licence.

**TITLE**

Patient feedback for safety improvement in primary care: Results from a feasibility study

**AUTHORS**

Andrea L Hernan<sup>1</sup>, Sally J Giles<sup>2</sup>, Hannah Beks<sup>1</sup>, Kevin Mc Namara<sup>1,3</sup>, Kate Kloot<sup>4</sup>, Marley J Binder<sup>1</sup>, Vincent L Versace<sup>1</sup>

**AUTHOR AFFILIATIONS**

1. Deakin Rural Health, School of Medicine, Deakin University, Geelong, Victoria, Australia
2. NIHR Greater Manchester Patient Safety Translational Research Centre, Division of Population Health, Health Services Research and Primary Care School of Health Sciences, University of Manchester, Manchester, United Kingdom
3. Centre for Population Health Research, Deakin University, Geelong, Australia
4. Centre for Rural Emergency Medicine, Deakin University, Warrnambool, Victoria, Australia

Corresponding author details:

Andrea L Hernan  
Deakin Rural Health  
School of Medicine, Deakin University  
Warrnambool  
Victoria, Australia 3280  
+613 5563 3505  
[andrea.hernan@deakin.edu.au](mailto:andrea.hernan@deakin.edu.au)

Key words: patient safety, primary care, patient involvement, feasibility, quality improvement

## ABSTRACT

**Objectives:** Patient involvement in safety improvement is a developing area of research. The aim of this study was to investigate the feasibility of a patient feedback on safety intervention in primary care. Specifically, the intervention acceptability, fidelity, implementation enablers and barriers, scalability, and process of systematically collecting safety data were examined.

**Design, setting and participants:** Mixed methods feasibility trial with six purposively selected Australian primary care practices.

**Intervention:** The intervention comprised an iterative process with a cycle of measurement, learning, feedback, action planning, and implementation period of six months.

**Primary and secondary outcomes:** Qualitative and quantitative data relating to feasibility measures (acceptability, fidelity, enablers, barriers, scalability, and process of collecting safety data) were collected and analysed.

**Results:** A total of n=1750 patients provided feedback on safety. There was a statistically significant increase in mean patient safety scores indicating improved safety (4.30 to 4.37, p=0.002). Staff deemed the intervention acceptable, with minor recommendations for improvement. Intervention fidelity was high and implementation enablers were attributed to the intervention structure and framework, use of intuitive problem solving approaches, and multidisciplinary team involvement. Practice-based safety interventions resulted in sustainable and measurable changes to systems for safety, such as increased access to care and improved patient information accuracy.

**Conclusions:** The findings indicate that this innovative patient feedback on safety intervention is feasible for scale-up to a larger effectiveness trial and further spread into policy and practice. This intervention complements existing safety improvement strategies and activities, and integrates into current patient feedback service requirements for Australian primary care. Further research is needed to examine the intervention effects on safety incident reduction.

## ARTICLE SUMMARY

### Strengths and limitations of this study

- A feasibility study was conducted prior to the development and implementation of a large-scale effectiveness trial and wider spread and uptake into policy and practice.
- Several feasibility domains were assessed including intervention acceptability, fidelity, implementation enablers and barriers, scalability, and process of systematically collecting safety data in a primary care.
- A mixed methods approach addressed each feasibility domain and included both qualitative and quantitative data collection and analysis.
- A limitation is that the data collected will be mostly descriptive, and, therefore, the generalisability of the findings may be limited to only one geographical area.



## INTRODUCTION

Involving patients in error prevention and harm reduction activities has gained traction over the past decade.<sup>1-7</sup> Patient engagement has been found to prevent or reduce adverse events, and increase awareness of potential safety risks.<sup>8</sup> Much of this research has centred on hospital settings with the majority of interventions utilising patient feedback mechanisms for safety improvement.<sup>3 8-12</sup> The evidence base regarding patient feedback on safety in primary care is considerably lacking by comparison.

In addition to reporting formal safety incidents<sup>13-16</sup>, patient feedback about processes, systems and structures that lead to safety incidents is an essential piece of the safety intelligence 'jigsaw'.<sup>17</sup> Patients have demonstrated understanding and knowledge about the various conditions in the latent environment that influence safety, such as access to care; communication systems; information and care planning; and transitions between care settings.<sup>17-20</sup> Capturing patient feedback about these contributory factors to safety incidents and using it for safety improvement work in primary care is a developing and novel field of research.<sup>21</sup>

Only one validated, real-time, and theory-derived patient feedback tool for assessment of factors contributing to safety in primary care is currently available - the Primary Care Patient Measure of Safety (PC PMOS).<sup>20 22</sup> The PC PMOS aims to enhance or complement current data collection methods for patient safety in primary care.<sup>20 22</sup> This self-administered tool is an acceptable, efficient, and appropriate mechanism for engaging patients in safety improvement.<sup>11 13 17 23</sup> The PC PMOS also facilitates primary care professionals and organisations learning, and drives implementation of real-time service improvements.<sup>20 21</sup>

The implementation and impact of interventions which use the PC PMOS tool for data-driven improvement and ongoing safety monitoring in primary care remains unexplored. Primary care, like most healthcare settings, is a complex system with multiple and multi-level factors likely to affect implementation of a patient feedback for safety improvement intervention.<sup>24</sup> While common

1  
2  
3 barriers and enablers to implementation of quality and safety improvement interventions have been  
4 published,<sup>25-27</sup> the specific processes and outcomes of using the PC PMOS in a primary care safety  
5 improvement intervention is unknown. Advocates for complexity science and implementation  
6 science in healthcare-improvement-research recommend feasibility studies be conducted prior to  
7 the introduction of large-scale effectiveness trials or wider spread into policy and practice.<sup>24 25 28-30</sup>  
8 Therefore, the aim of this study was to understand the acceptability, fidelity, implementation  
9 enablers and barriers, scalability, and process of systematically collecting safety data in a primary  
10 care patient feedback on safety intervention.

## 21 **METHODS**

22  
23 A detailed description of the study design and sampling frame, intervention, and primary and  
24 secondary outcome measures has been published in the study protocol.<sup>21</sup> A brief overview is  
25 provided below.

### 32 **Study design and sampling frame**

33  
34 This was a mixed methods feasibility trial with six purposively sampled primary care practices from  
35 the southwest region of Victoria, Australia (Appendix 1).

### 40 **Intervention**

41  
42 Intervention tool: PC PMOS

43  
44 The PC PMOS tool is an anonymous 28 item survey covering nine latent conditions in the primary  
45 care environment influencing safety incidents including: access to care, communication, the external  
46 policy environment, information flow, organisation and care planning, patient related factors, the  
47 physical environment, referral systems, and task performance (available on request).<sup>20 22</sup> The PC  
48 PMOS consists of a five point Likert scale with higher scores indicating safer primary care. The PC  
49 PMOS also captures patient reported safety incident data.

50  
51  
52  
53  
54  
55  
56  
57  
58  
59  
60 Intervention phases

1  
2  
3 The intervention comprised an iterative process with a cycle of measurement, learning, feedback,  
4  
5 action planning, and implementation period of six months (Figure 1).  
6  
7

8 Patient feedback about the safety of their care was measured using the PC PMOS tool at baseline  
9  
10 (Time 1 – T1). Primary care teams then used patient feedback from the PC PMOS to develop and  
11  
12 implement specific safety interventions over a six-month period. Patient feedback about the safety  
13  
14 of their care was measured again (PC PMOS) at the end of the intervention period (Time 2 - T2).  
15  
16

17  
18 Primary care practices were asked to form Safety Improvement Teams (SIT). These teams comprised  
19  
20 a minimum of three members and included any combination of Practice Manager, Practice Nurse,  
21  
22 Receptionist or Administration staff, or General Practitioner.  
23  
24

25 SIT members participated in two learning and development workshops on teamwork,  
26  
27 communication, implementation planning, the Model for Improvement's (Mfi) Plan-Do-Study-Act  
28  
29 (PDSA) methodology,<sup>31</sup> and trial information.  
30  
31

32 PC PMOS data from each practice was collated and presented to the SIT at an action planning  
33  
34 meeting. SIT members considered which area(s) of safety improvement to target, and developed  
35  
36 Goals, Measures, Ideas, and PDSA cycles. SIT members were responsible for implementing and  
37  
38 monitoring their specific safety intervention/s through application of multiple PDSA cycles over the  
39  
40 six month period.  
41  
42  
43

#### 44 **Data collection**

##### 45 Primary outcome

46  
47  
48 Feasibility measures included acceptability, intervention fidelity, implementation enablers and  
49  
50 barriers, and scalability. These data were collected using three qualitative methods:  
51  
52  
53

- 54  
55 • recordings and overt observations of SIT members at workshops and action planning  
56  
57 meetings
- 58  
59 • semi-structured interviews with SIT members at trial conclusion  
60

- reflexive researcher journaling

Audio data were transcribed verbatim. Overt participant observation data were recorded using detailed field note diaries and regular researcher discussion and reflection. Approximately 31 hours of audio was recorded with participants at workshops (2 x 3 hours), action planning meetings (6 x 1.5 hours), and semi-structured interviews (16 hours – 13 discrete individual or group interviews).

#### Secondary outcomes

##### *Patient feedback on contributing factors to safety*

Every adult ( $\geq 18$  years) presenting for their appointment was invited by the practice receptionist to complete the PC PMOS over a three-week period. Patients returned their surveys via a secure survey return box in the practice waiting room. Surveys were anonymous and completion was voluntary.

##### *Patient reported safety incidents and concerns*

The PC PMOS contains questions for patients to report any patient safety incident. Questions were adapted from the 'Patient Incident Reporting Tool' used in the Patient Reporting and Action for a Safe Environment intervention.<sup>32</sup> The PC PMOS has an 'other comments' free text question which also provides patients the opportunity to report safety incidents or concerns.

##### *Staff safety culture*

The validated Agency for Healthcare Research and Quality Medical Office Survey (MOS) on Patient Safety<sup>33</sup> was used to obtain data about staff safety culture perceptions at baseline (T1) (prior to patient data collection) and after the intervention (T2). All staff were invited to complete the survey and return it to the researcher via a provided pre-paid envelope. Surveys were anonymous and completion was voluntary.

##### *Safety incident reports*

1  
2  
3 Practice Managers provided a de-identified copy of their practice's clinical risk management/safety  
4 incident register from the previous 12 months at T1 and T2. Due to lack of detailed data provided on  
5 the register, specific analysis or categorisation of the safety incidents was unable to be performed.  
6  
7 However, the type of incident and any patient demographic data (age, gender) were cross checked  
8 with the patient reported safety incidents on the PC PMOS to assess for similarities or differences.  
9  
10  
11  
12  
13

### 14 **Data analysis**

#### 15 **Primary outcome**

16  
17  
18 Triangulation and thematic analysis techniques were employed to analyse the qualitative and  
19 content data. Both inductive and deductive approaches were used to undertake the analysis.<sup>34</sup>  
20  
21 Deductive approaches utilised the literature about healthcare culture and safety improvement,  
22 patient feedback and response theory, health service implementation science, and engagement and  
23 adaption theory.<sup>25-27 35 36</sup> Inductive coding was also performed on qualitative and content data by  
24 three researchers (AH, SG, HB). The initial coding framework centred on the feasibility measures of  
25 intervention enablers, barriers, acceptability, fidelity, and scalability. This framework was expanded  
26 through constant comparison with the data to create the final coding framework. Discrepancies  
27 between researchers were resolved through discussion. NVivo (QSR International Pty Ltd) was used  
28 to support the analysis.  
29  
30  
31  
32  
33  
34  
35  
36  
37  
38  
39  
40  
41  
42  
43

#### 44 *Intervention fidelity score*

45  
46 Intervention fidelity refers to the implementation of safety improvement interventions being  
47 delivered as intended.<sup>37</sup> The number of safety interventions implemented at each practice was  
48 assessed by the research team using a three choice response option– yes, no, or partially.  
49  
50  
51  
52  
53

#### 54 **Secondary outcomes**

55  
56 Quantitative data were analysed using SPSS Statistics (IBM version 24). Continuous variables were  
57 compared pre- and post-intervention using t-tests, while comparisons for non-parametric data used  
58  
59  
60

1  
2  
3 the Mann–Whitney U test. Categorical variables were compared using chi square-tests. Results were  
4  
5 considered statistically significant where  $p \leq 0.05$ .  
6  
7

8 The MOS percent positive scores for each ten patient safety culture composites, the average score  
9  
10 across the ten composites, and the overall patient safety rating were calculated at T1 and T2 for  
11  
12 each practice, and overall using t-tests.  
13  
14

### 15 **Patient and Public Involvement**

16  
17 Patients directly participated in the priority setting of safety interventions at a local level.  
18  
19 Specifically, patients concerns or experiences with systems for safety in the primary care  
20  
21 environment (e.g. access to care, communication, information and referral processes, organisation  
22  
23 and care planning) were acted on by primary care teams through development and implementation  
24  
25 of interventions which prevent safety incidents from occurring.  
26  
27  
28

### 29 **Informed consent**

30  
31 Patient consent was implied by completion and return of the PC PMOS questionnaire. This was  
32  
33 stated on the Plain Language Statement accompanying the PC PMOS questionnaire. All staff who  
34  
35 participated in a semi-structured interview with the researchers provided written consent to  
36  
37 participate. Each practice manager provided written practice consent for the research to be  
38  
39 undertaken at their practice.  
40  
41  
42  
43  
44

### 45 **Ethics approval**

46  
47 Ethics approval was obtained from Deakin University Human Ethics Advisory Group, Faculty of  
48  
49 Health. Project number: HEAG-H 175\_2017.  
50  
51  
52  
53  
54  
55

## 56 **RESULTS**

### 57 **Primary outcome**

58  
59  
60

1  
2  
3 Representative participant quotes corresponding to feasibility measures are presented in Table 1.  
4  
5  
6  
7  
8

9 Acceptability

10  
11 *Intervention acceptability*

12  
13  
14 The majority of staff found the intervention acceptable. Staff reported that the intervention was  
15  
16 predominantly positive and fitted within current organisational approaches to quality improvement.  
17  
18

19  
20 *Attitude towards patient feedback on safety*

21  
22 All staff valued patient feedback on safety. Positive feedback was welcomed and viewed as  
23  
24 contributing to workplace morale, job satisfaction, and reassurance that staff were meeting patient  
25  
26 expectations. Feedback on safety was accepted when it aligned with staff awareness of issues.  
27  
28

29 Furthermore, staff acceptance of the patient's reality also influenced believability of the feedback.  
30

31  
32 Staff exhibited a range of responses to negative patient feedback, including: acceptance; feelings of  
33  
34 empathy, surprise, or uncertainty; or being dismissive of feedback.  
35  
36

37  
38 Commonly mentioned reasons for dismissing patient feedback involved unrealistic patient  
39  
40 expectations; deeming patient concerns too problematic to fix or out of the practice's control;  
41  
42 previous attempts to solve the problem have failed; or the patient was a known difficult patient  
43  
44 (some staff speculated who a patient was even though the survey is anonymous).  
45  
46

47 *Using patient feedback to make changes*

48  
49 Some staff were cautious about using the patient feedback for safety improvement activity. They  
50  
51 contextualised the feedback in terms of where it may be coming from and how appropriate it would  
52  
53 be to respond. Additionally, some mentioned difficulties in choosing priority areas to address due to  
54  
55 largely positive patient scores limiting what they could respond to.  
56  
57  
58  
59  
60

1  
2  
3 Four of the six practice teams saw this trial as a catalyst for undertaking improvements that aligned  
4 with previously identified staff priorities, and not responding directly to the patient feedback. Two  
5  
6 practice teams attempted to link their chosen safety interventions back to domains of safety on the  
7  
8 PC PMOS. For example, improving waiting time or availability of appointments was a focus area for  
9  
10 staff yet the PC PMOS scores relating to access to care were largely positive. The other two practices  
11  
12 did not attempt to link their previously identified target area to a PC PMOS domain of safety. The  
13  
14 remaining two practices chose to address areas that were directly related to areas of concern  
15  
16 highlighted from the patient feedback. This was either a patient reported safety incident or a  
17  
18 negatively scored PC PMOS domain.  
19  
20  
21  
22  
23  
24  
25  
26

## 27 Implementation of safety interventions

### 28 29 *Intervention fidelity*

30  
31  
32 The average intervention duration of 5.8 months was considered acceptable by most practice teams.  
33  
34 Among the six practices, 25 safety improvement interventions were developed at the action  
35  
36 planning meeting or during the implementation period. Of these, 17 (68%) were fully implemented,  
37  
38 2 (8%) partially implemented, and 6 (24%) not implemented.  
39  
40  
41

42 The safety priorities targeted at the six practices included improvement in the following areas:  
43  
44 communication of patient recall and reminders, access to equipment and supplies, access to care,  
45  
46 accuracy of patient information, management of staff time, patient experience of waiting time, and  
47  
48 patient knowledge of registrar skills and abilities. There were no differences observed in success of  
49  
50 interventions that addressed either relational (communication, behaviour change etc.) or  
51  
52 transactional issues (data cleaning, equipment and supplies etc.). Other mediating and contextual  
53  
54 factors in the practice environment were attributed to the success or failure of safety interventions  
55  
56 by staff.  
57  
58  
59  
60



### *Barriers and enablers to intervention development and implementation*

#### Developing interventions

Staff employed both intuition and problem solving processes to develop safety interventions. This process appeared to be an enabler for practice teams. This often took the form of a rapid and informal root cause analysis where common sense and a pragmatic approach was apparent. This process did not require external facilitation and staff were easily able to identify latent conditions in the practice that contributed to the safety concern. Staff reported regular use of this approach for safety and quality improvement activities unrelated to this project, but had not recognised it as formal improvement work.

Some teams experienced challenges with translating their intuitive problem solving approach onto the Mfl framework. There was a perceived disconnect between the two problem solving methods. This mainly related to adjusting to new habits or ways of working and adhering to a structured process. Practice teams with greater quality improvement experience were better able to integrate these approaches and adapt accordingly.

#### Implementing interventions

The high intervention fidelity shown in this trial was attributed to various factors. One key enabler was the multidisciplinary dynamic within the SIT. The teams largely consisted of a practice manager, administration staff member, and a practice nurse. GPs adopted a more passive role in implementation. Nonetheless, GPs were engaged and supportive of the SIT and provided leadership and support when needed. Since most SITs comprised a practice manager, administration staff and a practice nurse, it was difficult to make comparisons about the effectiveness of teams that had different combination of staff roles.

Practice managers and administration staff often took primary responsibility and ownership for safety intervention implementation. As the interventions addressed the latent conditions within the

1  
2  
3 primary care system that contribute to safety incidents, the corresponding activities and tasks often  
4  
5 required input from administration staff rather than clinical staff. For example, ensuring patient  
6  
7 demographic information was up-to-date or improving appointment scheduling were viewed as  
8  
9 tasks to be undertaken by administration staff who are skilled and knowledgeable in this area.

10  
11  
12 Staff generally agreed that the Mfl was a useful and familiar structure for implementing safety  
13  
14 interventions. However, a few teams experienced some implementation challenges relating to the  
15  
16 prescriptive nature and linear processes proposed in the model. Lack of model flexibility and  
17  
18 adaptability were commonly cited as implementation barriers.

19  
20  
21 Staff also found measuring change difficult for various reasons. Identifying an appropriate measure  
22  
23 directly relating to their safety intervention was challenging. For example, some staff indicated it  
24  
25 was difficult to measure clinical outcomes or safety incidents averted. Often soft or proxy measures  
26  
27 were used due to unavailability or inaccessibility of data.

28  
29  
30 Staff identified a number of other barriers to implementation. These were common across all  
31  
32 practices and included lack of protected time, demanding priorities particularly for patient care,  
33  
34 issues with staff recruitment and retention as well as staff leave, power and team dynamics,  
35  
36 management support, and engagement from the wider practice.

#### 37 38 39 Scalability

40  
41  
42 Staff recommended some improvements to the structure and components of the intervention that  
43  
44 would enable future scale-up to a larger effectiveness trial or spread into policy and practice (Box 1).

45  
46  
47 Existing practice infrastructure and resources were deemed adequate for participation.

48  
49  
50 The two learning workshops and facilitated action planning meeting with the research team were  
51  
52 viewed as important. While the majority of staff felt that this level of facilitation was adequate,  
53  
54  
55  
56  
57  
58  
59  
60

1  
2  
3 others suggested additional action planning meetings throughout the intervention phase would  
4  
5 assist with accountability and implementation progress.  
6  
7

8 Patient data collection using the PC PMOS was considered relatively straightforward by practice  
9  
10 staff. Only one practice (Practice A) failed to complete T2 data collection. Reasons for this included  
11  
12 staff leave and patient survey fatigue. As the PC PMOS was a paper-based survey staff felt that  
13  
14 improvements could centre on electronic data collection to increase the efficiency of real-time  
15  
16 patient feedback, for example, via the use of waiting room iPads or emails to patients after their  
17  
18 consultation.  
19  
20  
21  
22  
23  
24

## 25 **Secondary outcomes**

26  
27  
28 Patient feedback on contributing factors to safety - PC PMOS scores  
29

30  
31 A total of n=1750 patients completed the PC PMOS at T1 and T2 (n=839 T1, n=911 T2), representing  
32  
33 a practice mean of 140 and 182 at T1 and T2 respectively. The crude response rate was 10.7%,  
34  
35 however the average response rate across the practices was 40.6%. Patient characteristics are  
36  
37 presented in Table 2. Patients completing the PC PMOS were significantly more likely to be older and  
38  
39 female (Appendix 2). Mean age was 56 years (SD 18.2) and mean number of visits to the practice in  
40  
41 the previous 12 months was 8 (SD 8.6).  
42  
43  
44

45 The PC PMOS total mean scores and domain scores for each practice at both times points are  
46  
47 presented in Table 3. There was a significant increase in total mean PC PMOS score for all practices  
48  
49 from T1 to T2 suggesting improved patient safety (4.30 (SD=0.49) to 4.37 (SD=0.47), p=0.002). There  
50  
51 were also significant increases in mean scores for all practices from T1 to T2 for the following  
52  
53 domains: access to care (4.09 to 4.23, p<0.001), communication (4.44 to 4.50, p=0.018), information  
54  
55 flow (4.27 to 4.36, p=0.007), and patient related factors (4.51 to 4.61, p<0.001). There was within  
56  
57 and between practice variation for specific PC PMOS domain scores (Table 3).  
58  
59  
60

1  
2  
3 Patient reported safety incidents and concerns data  
4  
5

6 Patient reported safety incident data are presented in Table 4. There were n=11 patient reported  
7  
8 safety incidents at T1, and n=9 at T2. The mean severity rating at T1 and T2 was 7.4 (scale 1 to 10  
9  
10 with 10 being 'extremely serious'). The median preventability rating of these safety incidents was  
11  
12 'Definitely preventable' at T1, and 'Probably preventable' at T2.  
13  
14

15 An additional n=17 safety incidents at T1, and n=12 at T2 were identified from the 'other comments'  
16  
17 section of the PC PMOS. Therefore, the total number of patient reported safety incidents was n=28  
18  
19 at T1, and n=21 at T2. The number of patient reported concerns (negative comments that were not a  
20  
21 patient safety incident) decreased from n=45 at T1 to n=25 at T2 (Table 4).  
22  
23  
24

25 Practice measures of safety  
26  
27

#### 28 *Staff perceptions of safety culture* 29 30

31 A total of n=57 staff completed the MOS survey at T1, and n=61 at T2. For the total sample there  
32  
33 was an increase in the mean percent positive score for the overall patient safety rating between T1  
34  
35 and T2, although not significant (72% to 74%, p=0.851). For the majority of the patient safety culture  
36  
37 composites and the average across the ten composites there was a reduction in mean percent  
38  
39 positive scores, with only one significant reduction for the Teamwork composite between T1 and T2  
40  
41 (89% to 80% p=0.029) (Appendix 3).  
42  
43  
44

#### 45 *Safety incidents recorded on practice clinical risk management system* 46 47

48 There was a reduction in the number of incidents recorded on practice's clinical risk management  
49  
50 system from T1 (n=32) to T2 (n=21) (Appendix 4). The incidents recorded on the practice clinical risk  
51  
52 management system were different to the incidents reported by patients on the PC PMOS.  
53  
54  
55  
56  
57

## 58 **DISCUSSION** 59 60

1  
2  
3 This is the first reported patient feedback on safety intervention in Australian primary care. The  
4  
5 findings indicate that the intervention is feasible for scale-up to a larger effectiveness trial and  
6  
7 further spread into policy and practice. Staff deemed the intervention acceptable, with minor  
8  
9 recommendations for improvement. Intervention fidelity was high and implementation enablers  
10  
11 were attributed to the intervention structure and framework, use of intuitive problem solving  
12  
13 approaches, and multidisciplinary team involvement. Barriers to implementation reflected  
14  
15 previously reported problems undertaking quality improvement in primary care, such as lack of time  
16  
17 and staff, demanding priorities, power and team dynamics, and wider practice support and  
18  
19 engagement.<sup>25-27</sup> The process of systematically collecting patient safety data was achievable with  
20  
21 n=1750 patient surveys completed. The utility of the PC PMOS tool as a measure for safety was  
22  
23 demonstrated through the significant increase in mean scores for all practices from T1 to T2 (4.30 to  
24  
25 4.37, p=0.002).

26  
27  
28  
29  
30 It is widely acknowledged that patient feedback is rarely used for safety and quality improvement  
31  
32 purposes.<sup>38-46</sup> This study identified some enablers and barriers that impacted on the intervention  
33  
34 development and implementation including the team dynamic, improvement framework, and staff  
35  
36 attitude.

37  
38  
39  
40 A unique aspect of this patient feedback on safety intervention was the multidisciplinary dynamic of  
41  
42 the primary care teams, particularly administration staff leadership. This was considered a key  
43  
44 enabler to intervention adherence and acceptability. The safety interventions targeted the  
45  
46 contributing factors to safety incidents; as such, administration staff were ideally placed for  
47  
48 intervention delivery. Administration staff transcended professional boundaries to generate  
49  
50 engagement and support, and implement changes at the latent end of the primary care system. In  
51  
52 this respect administration staff acted as change agents and innovators<sup>35 47 48</sup> and future safety  
53  
54 improvement work should consider their current underutilised role.  
55  
56  
57  
58  
59  
60

1  
2  
3 Although the Model for Improvement's Plan-Do-Study-Act cycle<sup>31</sup> is considered an effective,  
4 adaptable and flexible framework for quality improvement in some contexts, practice staff in this  
5 study identified it as a barrier to implementation. Formalising and documenting action plans in PDSA  
6 cycles was often in disconnect to their natural problem solving approach and routine practice. In a  
7 time, resource, and capacity scarce environment it is important that safety improvement  
8 frameworks are simple, and easily integrate or mimic everyday work flow. There are several well  
9 established quality improvement models<sup>49-51</sup> that could be utilised for this patient feedback on  
10 safety intervention, however more research is needed to identify and investigate staff acceptability  
11 and appropriateness of the different frameworks in this context.<sup>52</sup>

12  
13  
14 Staff attitude towards patient feedback on safety was similar to previous research, which reveals  
15 staff difficulty to engage with or value patient feedback.<sup>36 38 41 42 45 53-57</sup> While staff described the value  
16 and benefit of seeking patient feedback on safety, this was not entirely reflected in action plans or  
17 translated during intervention implementation. More than half of the practice teams undertook  
18 safety interventions that were a priority for staff rather than a priority for the patient.

19  
20  
21 Recommendations to improve staff action on patient feedback could centre on providing staff with  
22 structured and specific intervention examples that correspond to particular domains of safety on the  
23 PC PMOS. Moreover, such intervention examples could have explicitly linked measures of safety to  
24 each of the PC PMOS domains which may address the challenges staff experienced with creating  
25 measures of change.<sup>58</sup>

26  
27  
28 The process of systematically collecting primary care safety data from the practice, staff and patients  
29 was acceptable and feasible, yet some consideration is needed when determining appropriate  
30 measures of intervention effectiveness in a larger trial. Data about patient safety in primary care in  
31 Australia is largely absent. Australia does not have a structured or connected reporting and learning  
32 system to understand the threats to patient safety, and there is no current systematic way to collect  
33 information about safety incidents or patient harm.<sup>59 60</sup> Using available sources of patient safety data

1  
2  
3 in this study revealed some limitations; as such, objective measures of intervention effectiveness like  
4 statistical control charts<sup>61 62</sup>, PDSA cycle evaluation tools<sup>63 64</sup>, and record review<sup>65 66</sup> are  
5  
6 recommended.  
7  
8  
9

10 The findings from this study support results from other studies which have investigated patient  
11 feedback for safety improvement. While the majority of the research centres on hospital settings,  
12 the positive effect of patient feedback has been determined.<sup>3 8-12</sup> One systematic review identified  
13 gaps in understanding regarding the enablers and barriers for implementation of patient feedback  
14 interventions.<sup>8</sup> The findings from this study add to the discourse in this under-researched area.  
15  
16  
17  
18  
19  
20  
21

22 A limitation of this study was the sample. The practices were from one regional area, which may  
23 limit the generalisability of the findings. However, the diversity within the practices was considered  
24 adequate for this feasibility study. All practices had participated in one or more of the Australian  
25 Primary Care Collaborative Program<sup>67</sup> waves previously. Their commitment, interest, and  
26 understanding of safety and quality improvement processes was potentially already elevated prior  
27 to study commencement when compared with other practices. Results suggest the merit of  
28 conducting a larger scale effectiveness-implementation trial to determine the translatability of this  
29 intervention program and safety outcomes to primary care practices more generally.  
30  
31  
32  
33  
34  
35  
36  
37  
38  
39  
40  
41  
42  
43

## 44 **Conclusion**

45  
46 This study's findings have demonstrated the feasibility of introducing an innovative patient feedback  
47 for safety improvement intervention in primary care, as well as contextual and intervention factors  
48 that promote safety improvement. The intervention complements existing safety improvement  
49 strategies and activities, and integrates into current patient feedback service requirements for  
50 primary care. Further research is needed to examine the intervention effects on safety incident  
51 reduction.  
52  
53  
54  
55  
56  
57  
58  
59  
60

## Acknowledgements

The authors acknowledge the practice staff and patients who participated in this study. The authors would also like to acknowledge the administrative support from Gillian Beard and Liz Jackway.

## Contributors

ALH conceived and designed the study, and was principal investigator for the study. SJG, KMN, KK, and VV contributed to the study design. ALH, SG and HB were responsible for the qualitative data analysis and manuscript preparation. VV was responsible for the quantitative data analysis and manuscript preparation. ALH created the first draft of the manuscript and was responsible for its revisions. SJG, HB, KMN, KK, MJB, and VV contributed to specific sections of the manuscript. All authors read and approved the final version of the manuscript.

## Funding

This work was supported by the Western Alliance Academic Health Science Centre (grant number WA-733721).

## Competing interests

None declared.

## Data sharing statement

Data are available upon request to the authors.

## Ethics approval

Ethics approval was granted by the Deakin University Human Ethics Advisory Group, Faculty of Health (HEAG-H 175\_2017).



1  
2  
3 **REFERENCES**  
4  
5

- 6 1. Severinsson IE, Holm AL. Patient's role in their own safety-a systematic review of patient  
7 involvement in safety. *Open Journal of Nursing* 2015;5:642-53.  
8  
9  
10 2. Sutton E, Eborall H, Martin G. Patient Involvement in Patient Safety: Current experiences, insights  
11 from the wider literature, promising opportunities? *Public Management Review*  
12 2014;17(1):72-89. doi: 10.1080/14719037.2014.881538  
13  
14  
15 3. Hall J, Peat M, Birks Y, et al. Effectiveness of interventions designed to promote patient  
16 involvement to enhance safety: a systematic review. *Qual Saf Health Care* 2010;19(5):1-7.  
17  
18  
19 4. World Health Organization. Patient Engagement: Technical Series on Safer Primary Care. Geneva:  
20 WHO, 2016.  
21  
22  
23 5. Auraaen A, Slawomirski L, Klazinga N. The economics of patient safety in primary and ambulatory  
24 care: Flying blind. OECD Health Working Papers No 106. Directorate for Employment, Labour  
25 and Social Affairs, Health Division: Organisation for Economic Co-operation and  
26 Development, 2018.  
27  
28  
29 6. Health Foundation. Involving patients in improving safety. London, UK: The Health Foundation,  
30 2013.  
31  
32  
33 7. Vincent C, Davis R. Patients and families as safety experts. *CMAJ* 2012;184(1):15-16.  
34  
35  
36 8. Park M, Giap TTT. Patient and family engagement as a potential approach for improving patient  
37 safety: A systematic review. *J Adv Nurs* 2019  
38  
39  
40 9. Berger Z, Flickinger TE, Pfoh E, et al. Promoting engagement by patients and families to reduce  
41 adverse events in acute care settings: a systematic review. *BMJ Qual Saf* 2014;23(7):548-55.  
42  
43  
44 doi: 10.1136/bmjqs-2012-001769  
45  
46  
47 10. Birks Y, Hall J, McCaughan D, et al. Promoting patient involvement in safety initiatives. *Nurs*  
48 *Manag (Harrow)* 2011;18(1):16-20.  
49  
50  
51 11. Lawton R, Armitage G. The role of the patient in clinical safety. London UK: Health Foundation,  
52 2012.  
53  
54  
55  
56  
57  
58  
59  
60

- 1  
2  
3  
4  
5  
6  
7  
8  
9  
10  
11  
12  
13  
14  
15  
16  
17  
18  
19  
20  
21  
22  
23  
24  
25  
26  
27  
28  
29  
30  
31  
32  
33  
34  
35  
36  
37  
38  
39  
40  
41  
42  
43  
44  
45  
46  
47  
48  
49  
50  
51  
52  
53  
54  
55  
56  
57  
58  
59  
60
12. Lawton R, O'Hara JK, Sheard L, et al. Can patient involvement improve patient safety? A cluster randomised control trial of the Patient Reporting and Action for a Safe Environment (PRASE) intervention. *BMJ Qual Saf* 2017;26:622-31. doi: 10.1136/bmjqs-2016-005570
  13. Sahlström M, Partanen P, Turunen H. Patient-reported experiences of patient safety incidents need to be utilized more systematically in promoting safe care. *Int J Qual Health Care* 2018;30(10):778-85. doi: 10.1093/intqhc/mzy074
  14. Stocks SJ, Donnelly A, Esmail A, et al. Frequency and nature of potentially harmful preventable problems in primary care from the patient's perspective with clinician review: a population-level survey in Great Britain. *BMJ Open* 2018;8(6):e020952. doi: 10.1136/bmjopen-2017-020952
  15. Armitage G, Moore S, Reynolds C, et al. Patient-reported safety incidents as a new source of patient safety data: an exploratory comparative study in an acute hospital in England. *J Health Serv Res Policy* 2018;23(1):36-43. doi: 10.1177/1355819617727563
  16. O'Hara JK, Reynolds C, Moore S, et al. What can patients tell us about the quality and safety of hospital care? Findings from a UK multicentre survey study. *BMJ Qual Saf* 2018;27(9):673-82. doi: 10.1136/bmjqs-2017-006974
  17. O'Hara JK, Isden R. Identifying risks and monitoring safety: the role of patients and citizens. Thought paper: The Health Foundation, 2013.
  18. Giles SJ, Lawton RJ, Din I, et al. Developing a patient measure of safety (PMOS). *BMJ Qual Saf* 2013;22(7):554-62. doi: 10.1136/bmjqs-2012-000843
  19. Hernan A, Giles S, Fuller J, et al. Patient and carer identified factors which contribute to safety incidents in primary care: a qualitative study. *BMJ Qual Saf* 2015;24(9):583-93. doi: 10.1136/bmjqs-2015-004049
  20. Hernan AL, Giles SJ, O'Hara JK, et al. Developing a primary care patient measure of safety (PC PMOS): a modified Delphi process and face validity testing. *BMJ Qual Saf* 2016;25(4):273-80. doi: 10.1136/bmjqs-2015-004268

- 1  
2  
3 21. Hernan AL, Kloot K, Giles SJ, et al. Investigating the feasibility of a patient feedback tool to  
4  
5 improve safety in Australian primary care: a study protocol. *BMJ Open* 2019;9(5):e027327.  
6  
7 doi: 10.1136/bmjopen-2018-027327  
8  
9
- 10 22. Giles SJ, Parveen S, Hernan AL. Validation of the Primary Care Patient Measure of Safety (PC  
11  
12 PMOS) questionnaire. *BMJ Qual Saf* 2019;28(5):389-96. doi: 10.1136/bmjqs-2018-007988  
13  
14
- 15 23. Smith K, Baker K, Wesley D, et al. Guide to Improving Patient Safety in Primary Care Settings by  
16  
17 Engaging Patients and Families: Environmental Scan Report. Rockville, MD: Agency for  
18  
19 Healthcare Research and Quality, 2017.  
20
- 21 24. Braithwaite J. Changing how we think about healthcare improvement. *BMJ* 2018;361:k2014. doi:  
22  
23 10.1136/bmj.k2014  
24
- 25 25. Braithwaite J, Marks D, Taylor N. Harnessing implementation science to improve care quality and  
26  
27 patient safety: a systematic review of targeted literature. *Int J Qual Health Care*  
28  
29 2014;26(3):321-9. doi: 10.1093/intqhc/mzu047  
30  
31
- 32 26. Brennan SE, Bosch M, Buchan H, et al. Measuring organizational and individual factors thought to  
33  
34 influence the success of quality improvement in primary care: a systematic review of  
35  
36 instruments. *Implement Sci* 2012;7(1):121. doi: 10.1186/1748-5908-7-121  
37  
38
- 39 27. Kaplan HC, Provost LP, Froehle CM, et al. The Model for Understanding Success in Quality  
40  
41 (MUSIQ): building a theory of context in healthcare quality improvement. *BMJ Qual Saf*  
42  
43 2012;21(1):13-20. doi: 10.1136/bmjqs-2011-000010  
44  
45
- 46 28. Nilsen P, Bernhardsson S. Context matters in implementation science: a scoping review of  
47  
48 determinant frameworks that describe contextual determinants for implementation  
49  
50 outcomes. *BMC Health Serv Res* 2019;19(1):189.  
51
- 52 29. Greenhalgh T, Papoutsi C. Spreading and scaling up innovation and improvement. *BMJ*  
53  
54 2019;365:l2068. doi: 10.1136/bmj.l2068  
55  
56
- 57 30. Greenhalgh T, Papoutsi C. Studying complexity in health services research: desperately seeking  
58  
59 an overdue paradigm shift. *BMC Medicine* 2018;16(1):95. doi: 10.1186/s12916-018-1089-4  
60

- 1  
2  
3 31. Langley G, Moen R, Nolan K, et al. The improvement guide: a practical approach to enhancing  
4  
5 organizational performance: John Wiley & Sons 2009.  
6  
7  
8 32. Wright J, Lawton R, O'Hara J, et al. Chapter 6, Learning from error: a comparative study of  
9  
10 patient-reported patient safety incidents and existing sources of patient safety data.  
11  
12 Improving patient safety through the involvement of patients: development and evaluation  
13  
14 of novel interventions to engage patients in preventing patient safety incidents and  
15  
16 protecting them against unintended harm. Southampton (UK): NIHR Journals Library 2016.  
17  
18  
19 33. Agency for Healthcare Research and Quality. Medical Office Survey on patient safety culture.  
20  
21 Rockville, MD 2017.  
22  
23  
24 34. Tavory I, Timmermans S. Abductive analysis: Theorizing qualitative research: University of  
25  
26 Chicago Press 2014.  
27  
28 35. Sheard L, Marsh C, O'Hara J, et al. Exploring how ward staff engage with the implementation of a  
29  
30 patient safety intervention: a UK-based qualitative process evaluation. *BMJ Open* 2017;7(7)  
31  
32 doi: 10.1136/bmjopen-2016-014558  
33  
34 36. Sheard L, Marsh C, O'Hara J, et al. The Patient Feedback Response Framework – Understanding  
35  
36 why UK hospital staff find it difficult to make improvements based on patient feedback: A  
37  
38 qualitative study. *Soc Sci Med* 2017;178:19-27. doi: 10.1016/j.socscimed.2017.02.005  
39  
40  
41 37. Carroll C, Patterson M, Wood S, et al. A conceptual framework for implementation fidelity.  
42  
43 *Implement Sci* 2007;2(1):40. doi: 10.1186/1748-5908-2-40  
44  
45  
46 38. Baldie DJ, Guthrie B, Entwistle V, et al. Exploring the impact and use of patients' feedback about  
47  
48 their care experiences in general practice settings—a realist synthesis. *Fam Pract*  
49  
50 2017;35(1):13-21. doi: 10.1093/fampra/cmz067  
51  
52  
53 39. Sheard L, Peacock R, Marsh C, et al. What's the problem with patient experience feedback? A  
54  
55 macro and micro understanding, based on findings from a three-site UK qualitative study.  
56  
57 *Health Expect* 2019;22(1):46-53. doi: 10.1111/hex.12829  
58  
59  
60

- 1  
2  
3 40. de Vos MS, Hamming JF, Marang-van de Mheen PJ. The problem with using patient complaints  
4  
5 for improvement. *BMJ Qual Saf* 2018;27(9):758-62. doi: 10.1136/bmjqs-2017-007463  
6  
7  
8 41. Flott KM, Graham C, Darzi A, et al. Can we use patient-reported feedback to drive change? The  
9  
10 challenges of using patient-reported feedback and how they might be addressed. *BMJ Qual*  
11  
12 *Saf* 2017;26(6):502-07. doi: 10.1136/bmjqs-2016-005223  
13  
14 42. Boiko O, Campbell JL, Elmore N, et al. The role of patient experience surveys in quality assurance  
15  
16 and improvement: a focus group study in English general practice. *Health Expect*  
17  
18 2015;18(6):1982-94. doi: 10.1111/hex.12298  
19  
20 43. Gardner K, Parkinson A, Banfield M, et al. Usability of patient experience surveys in Australian  
21  
22 primary health care: a scoping review. *Aust J Prim Health* 2016;22(2):93-99. doi:  
23  
24 10.1071/PY14179  
25  
26 44. Davies E, Cleary PD. Hearing the patient's voice? Factors affecting the use of patient survey data  
27  
28 in quality improvement. *Qual Saf Health Care* 2005;14(6):428-32. doi:  
29  
30 10.1136/qshc.2004.012955  
31  
32 45. Greenhalgh J, Dalkin S, Gooding K, et al. Functionality and feedback: a realist synthesis of the  
33  
34 collation, interpretation and utilisation of patient-reported outcome measures data to  
35  
36 improve patient care. Southampton (UK): NIHR Journals Library 2017.  
37  
38  
39 46. Gleeson H, Calderon A, Swami V, et al. Systematic review of approaches to using patient  
40  
41 experience data for quality improvement in healthcare settings. *BMJ Open*  
42  
43 2016;6(8):e011907. doi: 10.1136/bmjopen-2016-011907  
44  
45  
46 47. Greenhalgh T. Role of routines in collaborative work in healthcare organisations. *BMJ*  
47  
48 2008;337:a2448. doi: 10.1136/bmj.a2448  
49  
50  
51 48. Lucas B, Nacer H. The habits of an improver: thinking about learning for improvement in  
52  
53 healthcare. London: The Health Foundation, 2015.  
54  
55  
56 49. Toussaint JS, Berry LL. The Promise of Lean in Health Care. *Mayo Clin Proc* 2013;88(1):74-82. doi:  
57  
58 10.1016/j.mayocp.2012.07.025  
59  
60

- 1  
2  
3 50. Schroeder RG, Linderman K, Liedtke C, et al. Six Sigma: Definition and underlying theory. *Journal*  
4  
5 *of Operations Management* 2008;26(4):536-54. doi: 10.1016/j.jom.2007.06.007  
6  
7  
8 51. Brannan KM. Total quality in health care. *Hosp Mater Manage Q* 1998;19(4):1-8.  
9  
10 52. Johnson A, Clay-Williams R, Lane P. Framework for better care: reconciling approaches to patient  
11  
12 safety and quality. *Aust Health Rev* 2019;43(6):653-55. doi: 10.1071/AH18050  
13  
14 53. Burt J, Campbell J, Abel G, et al. Programme Grants for Applied Research. Improving patient  
15  
16 experience in primary care: a multimethod programme of research on the measurement and  
17  
18 improvement of patient experience. Southampton (UK): NIHR Journals Library 2017.  
19  
20 54. Wensing M, Vingerhoets E, Grol R. Feedback based on patient evaluations: a tool for quality  
21  
22 improvement? *Patient Educ Couns* 2003;51(2):149-53. doi: 10.1016/S0738-3991(02)00199-4  
23  
24 55. Farrington C, Burt J, Boiko O, et al. Doctors' engagements with patient experience surveys in  
25  
26 primary and secondary care: a qualitative study. *Health Expect* 2017;20(3):385-94. doi:  
27  
28 10.1111/hex.12465  
29  
30 56. Asprey A, Campbell JL, Newbould J, et al. Challenges to the credibility of patient feedback in  
31  
32 primary healthcare settings: a qualitative study. *Br J Gen Pract* 2013;63(608):e200-e08. doi:  
33  
34 10.3399/bjgp13X664252  
35  
36 57. NIHR Dissemination Centre. Improving care by using patient feedback. In: Maxwell E, Lamont T,  
37  
38 eds. NIHR Themed Review: National Institute for Health Research, 2019.  
39  
40 58. Woodcock T, Liberati EG, Dixon-Woods M. A mixed-methods study of challenges experienced by  
41  
42 clinical teams in measuring improvement. *BMJ Qual Saf* 2019 doi: 10.1136/bmjqs-2018-  
43  
44 009048  
45  
46 59. Russell LM, Dawda P. Patient safety in primary care: more data and more action needed. *MJA*  
47  
48 2015;202(2):72-3. doi: 10.5694/mja14.00964  
49  
50 60. Makeham M. Primary health networks - a new home for patient safety in primary care? *Health*  
51  
52 *Voices* 2015;16:19-20.  
53  
54  
55  
56  
57  
58  
59  
60

- 1  
2  
3 61. Benneyan JC, Lloyd RC, Plsek PE. Statistical process control as a tool for research and healthcare  
4  
5 improvement. *Qual Saf Health Care* 2003;12(6):458-64. doi: 10.1136/qhc.12.6.458  
6  
7  
8 62. Fretheim A, Tomic O. Statistical process control and interrupted time series: a golden  
9  
10 opportunity for impact evaluation in quality improvement. *BMJ Qual Saf* 2015;24(12):748-  
11  
12 52. doi: 10.1136/bmjqs-2014-003756  
13  
14 63. Poots AJ, Reed JE, Woodcock T, et al. How to attribute causality in quality improvement: lessons  
15  
16 from epidemiology. *BMJ Qual Saf* 2017;26(11):933-37. doi: 10.1136/bmjqs-2017-006756  
17  
18  
19 64. McNicholas C, Lennox L, Woodcock T, et al. Evolving quality improvement support strategies to  
20  
21 improve Plan-Do-Study-Act cycle fidelity: a retrospective mixed-methods study. *BMJ Qual*  
22  
23 *Saf* 2019;28(5):356-65.  
24  
25  
26 65. Esmail A. Measuring and monitoring safety: a primary care perspective. Thought paper. London:  
27  
28 The Health Foundation, 2013.  
29  
30 66. Hanskamp-Sebregts M, Zegers M, Vincent C, et al. Measurement of patient safety: a systematic  
31  
32 review of the reliability and validity of adverse event detection with record review. *BMJ*  
33  
34 *Open* 2016;6(8):e011078. doi: 10.1136/bmjopen-2016-011078  
35  
36  
37 67. Knight AW, Caesar C, Ford D, et al. Improving primary care in Australia through the Australian  
38  
39 Primary Care Collaboratives Program: a quality improvement report. *BMJ Qual Saf* 2012 doi:  
40  
41 10.1136/bmjqs-2011-000165  
42  
43  
44 68. Carson-Stevens A, Hibbert P, Williams H, et al. Characterising the nature of primary care patient  
45  
46 safety incident reports in the England and Wales National Reporting and Learning System: a  
47  
48 mixed-methods agenda-setting study for general practice. Southampton (UK): NIHR Journals  
49  
50 Library 2016.  
51  
52  
53  
54  
55  
56  
57  
58  
59  
60

**Table 1. Key participant quotes corresponding to feasibility measures**

| Feasibility measure | Theme                                       | Sub-theme                                                                      | Participant quote                                                                                                                                                                                                                                                                                                                                                                                                             |
|---------------------|---------------------------------------------|--------------------------------------------------------------------------------|-------------------------------------------------------------------------------------------------------------------------------------------------------------------------------------------------------------------------------------------------------------------------------------------------------------------------------------------------------------------------------------------------------------------------------|
| Acceptability       | Attitude towards patient feedback on safety | Value patient feedback on safety                                               | <p>"It's always, the valuable ones are always the awful ones, aren't they? You know... it's really precious. Ain't often people are honest like that..." (GP, Practice D, APM)</p> <p>"It's better to be informed about it so that you can make that change...it makes it more positive for everybody then"...(Administration Staff, Practice E, APM)</p>                                                                     |
|                     |                                             | Patient feedback on safety aligned with staff awareness of issues              | "the bits that were flagged that were in there [feedback report] were probably what we expected ..." (PN, Practice D, APM).                                                                                                                                                                                                                                                                                                   |
|                     |                                             | Believability of the feedback                                                  | "And I accept the [safety incident] one, because, perception is truth." (GP, Practice B, APM).                                                                                                                                                                                                                                                                                                                                |
|                     |                                             | Concern and empathy towards patient feedback                                   | <p>"... there's one [safety incident] I was actually concerned, there's a patient who obviously feels that we haven't done our best by them." (PM, Practice A, APM).</p> <p>"So someone had a blocked airway. That sounds really terrible, doesn't it? It's [an] emergency." (PN, Practice A, APM).</p>                                                                                                                       |
|                     |                                             | Surprised or unsure how to respond when feedback differed to staff perceptions | <p>"I thought we have got some more negative feedback from people, which surprised me." (PN1, Practice C, APM).</p> <p>"But I'm not quite sure about that [safety incident] one... I found that one very odd, because... probably some of the best staff we have are down that end of the building, without being horrible to others, but the doctors even say that. I just find that really odd." (PM, Practice B, APM).</p> |
|                     |                                             | Dismissive towards patient feedback                                            | "I think sometimes it's that lack of understanding, that they [GP] can't come and fix the world in fifteen minutes" (PN1, Practice C, APM).                                                                                                                                                                                                                                                                                   |



| Feasibility measure                                                  | Theme                                  | Sub-theme                                                                        | Participant quote                                                                                                                                                                                                                                                                                                                                                                                                                                                                                                |
|----------------------------------------------------------------------|----------------------------------------|----------------------------------------------------------------------------------|------------------------------------------------------------------------------------------------------------------------------------------------------------------------------------------------------------------------------------------------------------------------------------------------------------------------------------------------------------------------------------------------------------------------------------------------------------------------------------------------------------------|
|                                                                      | Using patient feedback to make changes |                                                                                  | “when you get that: ‘I can’t see the doctor that I want to see’ [patient comment]. Well we’ve been working on this for five years trying to improve things!” (PM, Practice D, Final Interview)                                                                                                                                                                                                                                                                                                                   |
|                                                                      |                                        | Cautious about using patient feedback for safety improvement                     | “But we need to... you know, decide on what, what we think's important to change... and what's changeable. And I don't think we can do anything about this [safety incident].” (GP, Practice A, APM)                                                                                                                                                                                                                                                                                                             |
|                                                                      |                                        | Largely positive feedback limited staff response                                 | “We didn’t have too many negatives [feedback] which is a good thing but also, it was sort of, well do we need to change that much?” (PM, Practice A, Final interview)                                                                                                                                                                                                                                                                                                                                            |
|                                                                      |                                        | Using staff identified areas of service improvement rather than patient feedback | “...even though it's not, it's not showing up as negative as I thought it might've, so I was really happy about that, but I think the appointment system will still [need to be addressed]... And I think that will assist the, there's less likely to be an error. So there's less likely to be a, ah, negative outcome for the patient” (PM, Practice A, APM).                                                                                                                                                 |
| Barriers and enablers to intervention development and implementation | Developing interventions               | Intuitive problem solving process                                                | <p>“We're probably doing it anyway, but we don't realize it's a model for improvement.” (PN2, Practice C, Final interview)</p> <p>“So we [other administration staff] we probably collaborate a lot. We throw ideas around. You know how to do different things. So we're probably the thinkers.” (Admin, Practice F, Final interview)</p>                                                                                                                                                                       |
|                                                                      |                                        | Disconnect between staff problem solving process and Mfl framework               | <p>“It was a good framework. Initially, what we found was when barriers kind of ah developed, we had trouble readjusting to that [Mfl framework].” (GP, Practice F, Final interview)</p> <p>“I didn't ever use a model I was just sort of like, “This is what I'm trying to achieve. This is how I'm going to do it”... Did it work? Didn't it work? Which is probably the same model, but I just didn't actually outline it or ever document it. It was just in my head.” (PN, Practice D, Final Interview)</p> |

| Feasibility measure  | Theme                                                                                                                                                                                       | Sub-theme                                                                                                                                                                                      | Participant quote                                                                                                                                                                                                                                                                                                                                                                                                                                                                                         |
|----------------------|---------------------------------------------------------------------------------------------------------------------------------------------------------------------------------------------|------------------------------------------------------------------------------------------------------------------------------------------------------------------------------------------------|-----------------------------------------------------------------------------------------------------------------------------------------------------------------------------------------------------------------------------------------------------------------------------------------------------------------------------------------------------------------------------------------------------------------------------------------------------------------------------------------------------------|
|                      |                                                                                                                                                                                             |                                                                                                                                                                                                | <p>“We are not very keen of formally doing that [sic.] things [MFI]. The simple the better.” (GP, Practice E, Final Interview)</p> <p>“...we probably were never really good at documenting that stuff. Document ... as I said, in here you're kind of doing things on the run, do you know what I mean? You go, "Oh yeah, we'll do that."” (PM, Practice E, Final Interview)</p>                                                                                                                         |
|                      |                                                                                                                                                                                             | Integrating and adapting problem solving approaches                                                                                                                                            | <p>“[The model for improvement] is a good process and it's simple but sometimes we complicate it by making it bigger than what it is” (PN1, Practice C, Final Interview).</p> <p>“ ... [we] do the PDSA cycle, not necessarily super formally but we just, we identify what needs to be done and we try to make our changes small not big and then we introduce those to the practice or to specific members of the practice team who might need to know about it.” (GP, Practice A, Final Interview)</p> |
|                      | Implementing interventions                                                                                                                                                                  | Multidisciplinary team                                                                                                                                                                         | <p>“I just figured that it would end up falling probably on the three of us [PM, PN, Admin]. Because I knew [GP] was going to be time poor... So he was there if we needed him and we would bug him.’ (PM, Practice B, Final Interview)</p>                                                                                                                                                                                                                                                               |
|                      | Staff responsibility and ownership for intervention linked to type of improvement activity                                                                                                  | <p>“I like data. I like playing with data [laughter]. I enjoyed doing a lot of the collection and stuff and seeing what you can do to make it happen...” (PM, Practice C, Final Interview)</p> |                                                                                                                                                                                                                                                                                                                                                                                                                                                                                                           |
|                      | Difficulty in measuring change in safety outcomes                                                                                                                                           | <p>‘It is difficult to measure outcome because if you prevent a complication, it [is] what it is’ (GP, Practice E, Workshop 2)</p>                                                             |                                                                                                                                                                                                                                                                                                                                                                                                                                                                                                           |
| Use of soft measures | <p>“...because there were things that we couldn't really kind of quantify. I mean, how do you quantify [staff member] stress level based on one particular aspect and you know separate</p> |                                                                                                                                                                                                |                                                                                                                                                                                                                                                                                                                                                                                                                                                                                                           |

| Feasibility measure | Theme | Sub-theme                                             | Participant quote                                                                                                                                                                                                                                                                                                                                                                                                                                                                                                                                                                                                                 |
|---------------------|-------|-------------------------------------------------------|-----------------------------------------------------------------------------------------------------------------------------------------------------------------------------------------------------------------------------------------------------------------------------------------------------------------------------------------------------------------------------------------------------------------------------------------------------------------------------------------------------------------------------------------------------------------------------------------------------------------------------------|
|                     |       |                                                       | it from...? That was what we had trouble with, more than anything." (GP, Practice F, Final Interview)                                                                                                                                                                                                                                                                                                                                                                                                                                                                                                                             |
|                     |       | Staff support and engagement                          | "Nobody wanted to be part of the safety improvement team, like, as soon as [you] mention anything like this, everyone's just like [pause] 'Not again'." (PM, Practice D, Workshop 2).                                                                                                                                                                                                                                                                                                                                                                                                                                             |
|                     |       | Time and resources                                    | <p>"I felt as though we could have actually used a, 'Alright, what's going wrong? Let's troubleshoot this and see.' I don't think as a team, we were able to devote the time or the resources or energy to actually do that when we hit those barriers." (GP, Practice F, Final Interview)</p> <p>'A lot's changed in the practice since we [started the trial]. A lot of fairly massive things. We've taken on 50% more students, we've got a few more extra learners, we've got a few other things going on plus we've had just some stuff, health issues, which have had a huge impact.' (GP, Practice A, Final Interview)</p> |
| Trail scalability   |       | Increased facilitation and support from research team | <p>"I think the workshops were valuable. I don't know whether we can just blame the [intervention barriers], I suppose our lack of engagement with [the intervention]. Maybe if we had to engage a little bit more, it probably would have kept us on track a bit more I think... even if it was just on the phone or something." (PM, Practice D, Final Interview)</p> <p>"I think you need somebody that's there as the overseer to keep us on track." (PM, Practice B, Final interview).</p>                                                                                                                                   |
|                     |       | Real-time electronic patient feedback processes       | "Something electronic I think we'd definitely be interested in. Even things, like the emails and text messages and stuff to people after they've been to their appointment, people don't have to do them then and there. They can sit on their couch at home and do it at night when they've actually got time... I would imagine we would get different feedback if patients were being surveyed after their appointment." (PM, Practice D, Final interview).                                                                                                                                                                    |

1  
2  
3 PM: Practice Manager

4  
5 PN: Practice Nurse

6  
7 GP: General Practitioner

8  
9 APM: Action Planning Meeting

10  
11 Workshop 2: Participant recording during discussions from Workshop 2

12  
13 MFI: Model for Improvement

14  
15  
16  
17  
18  
19  
20  
21  
22  
23  
24  
25  
26  
27  
28  
29  
30  
31  
32  
33  
34  
35  
36  
37  
38  
39  
40  
41  
42  
43  
44  
45  
46

For peer review only

Table 2. Patient demographic characteristics

|                                                     | Practice A |    | Practice B |            | Practice C |           | Practice D |            | Practice E |            | Practice F |            | Total      |             |
|-----------------------------------------------------|------------|----|------------|------------|------------|-----------|------------|------------|------------|------------|------------|------------|------------|-------------|
|                                                     | T1         | T2 | T1         | T2         | T1         | T2        | T1         | T2         | T1         | T2         | T1         | T2         | T1         | T2          |
| Gender (n)                                          | 99         | -  | 195        | 197        | 141        | 150       | 128        | 142        | 146        | 155        | 113        | 257        | 822        | 901         |
| Male (n, %)                                         | 24 (24.2)  | -  | 48 (24.6)  | 62 (31.5)  | 67 (47.5)  | 71 (47.3) | 24 (18.8)  | 29 (20.4)  | 43 (29.5)  | 51 (32.9)  | 35 (31.0)  | 97 (37.7)  | 241 (29.3) | 310 (35.4)* |
| Female (n, %)                                       | 75 (75.8)  | -  | 147 (75.4) | 135 (68.5) | 74 (52.5)  | 79 (52.7) | 104 (81.3) | 113 (79.6) | 103 (70.5) | 104 (67.1) | 78 (69.0)  | 160 (62.3) | 581 (70.7) | 591 (65.6)  |
| Age (mean, SD)                                      | 53 (17.2)  | -  | 55 (17.2)  | 55 (18.4)  | 63 (16.8)  | 61 (17.7) | 47 (17.7)  | 50 (18.6)  | 57 (18.9)  | 59 (18.1)  | 55 (17.4)  | 54 (17.7)  | 55 (18.1)  | 56 (18.3)   |
| Visits to practice in previous 12 months (mean, SD) | 13 (15.9)  | -  | 7 (5.9)    | 8 (5.9)*   | 7 (5.8)    | 8 (11.0)  | 8 (9.4)    | 9 (9.3)    | 7 (6.1)    | 8 (10.1)   | 8 (5.7)    | 8 (7.8)    | 8 (8.5)    | 8 (8.7)     |

\* Statistically significant difference between baseline and 6 months  $p < 0.05$

T1= Time 1 (Baseline)

T2 = Time 2 (6 months post intervention period)

**Table 3. PC PMOS overall and domain specific scores by practice**

|                                          | Practice A     |    | Practice B     |                   | Practice C     |                  | Practice D     |                | Practice E     |                  | Practice F     |                  | Total          |                   |
|------------------------------------------|----------------|----|----------------|-------------------|----------------|------------------|----------------|----------------|----------------|------------------|----------------|------------------|----------------|-------------------|
|                                          | T1             | T2 | T1             | T2                | T1             | T2               | T1             | T2             | T1             | T2               | T1             | T2               | T1             | T2                |
| PC PMOS mean score (SD)                  | 4.22<br>(0.67) | -  | 4.29<br>(0.46) | 4.46 **<br>(0.40) | 4.26<br>(0.50) | 4.36<br>(0.46)   | 4.44<br>(0.42) | 4.47<br>(0.44) | 4.24<br>(0.49) | 4.26<br>(0.49)   | 4.36<br>(0.40) | 4.32<br>(0.52)   | 4.30<br>(0.49) | 4.37 *<br>(0.47)  |
| Access Mean (SD)                         | 3.94<br>(0.84) | -  | 4.12<br>(0.64) | 4.38 **<br>(0.60) | 4.03<br>(0.67) | 4.26 *<br>(0.67) | 4.24<br>(0.71) | 4.29<br>(0.67) | 4.01<br>(0.76) | 4.07<br>(0.75)   | 4.16<br>(0.68) | 4.15<br>(0.76)   | 4.09<br>(0.71) | 4.23 **<br>(0.70) |
| Communication Mean (SD)                  | 4.37<br>(0.64) | -  | 4.41<br>(0.50) | 4.56 *<br>(0.47)  | 4.40<br>(0.52) | 4.47<br>(0.56)   | 4.60<br>(0.45) | 4.60<br>(0.47) | 4.37<br>(0.57) | 4.44<br>(0.53)   | 4.51<br>(0.46) | 4.45<br>(0.58)   | 4.44<br>(0.53) | 4.50 *<br>(0.53)  |
| External policy environment Mean (SD)    | 4.18<br>(0.82) | -  | 4.00<br>(0.88) | 4.16<br>(0.90)    | 4.05<br>(0.97) | 4.08<br>(1.04)   | 4.07<br>(1.08) | 4.20<br>(1.00) | 3.97<br>(0.94) | 3.90<br>(1.01)   | 3.94<br>(1.05) | 4.09<br>(1.03)   | 4.03<br>(0.96) | 4.09<br>(1.00)    |
| Information flow Mean (SD)               | 4.18<br>(0.68) | -  | 4.27<br>(0.63) | 4.46 *<br>(0.56)  | 4.26<br>(0.58) | 4.42 *<br>(0.59) | 4.42<br>(0.61) | 4.41<br>(0.68) | 4.18<br>(0.67) | 4.29<br>(0.61)   | 4.31<br>(0.61) | 4.25<br>(0.68)   | 4.27<br>(0.63) | 4.36 *<br>(0.63)  |
| Organisation and care planning Mean (SD) | 4.37<br>(0.55) | -  | 4.27<br>(0.61) | 4.47 *<br>(0.62)  | 4.36<br>(0.56) | 4.37<br>(0.57)   | 4.36<br>(0.54) | 4.44<br>(0.49) | 4.29<br>(0.53) | 4.30<br>(0.66)   | 4.45<br>(0.56) | 4.36<br>(0.65)   | 4.34<br>(0.56) | 4.39<br>(0.61)    |
| Patient related factors Mean (SD)        | 4.45<br>(0.78) | -  | 4.45<br>(0.65) | 4.69 **<br>(0.54) | 4.49<br>(0.70) | 4.56<br>(0.71)   | 4.63<br>(0.60) | 4.75<br>(0.53) | 4.48<br>(0.58) | 4.51<br>(0.73)   | 4.60<br>(0.57) | 4.57<br>(0.65)   | 4.51<br>(0.65) | 4.61 *<br>(0.64)  |
| Physical environment Mean (SD)           | 4.47<br>(0.69) | -  | 4.48<br>(0.53) | 4.65 *<br>(0.49)  | 4.58<br>(0.55) | 4.57<br>(0.58)   | 4.60<br>(0.51) | 4.63<br>(0.58) | 4.47<br>(0.59) | 4.50<br>(0.60)   | 4.64<br>(0.48) | 4.47 *<br>(0.66) | 4.54<br>(0.56) | 4.56<br>(0.59)    |
| Referral systems Mean (SD)               | 4.38<br>(0.6)  | -  | 4.37<br>(0.56) | 4.53 *<br>(0.54)  | 4.34<br>(0.57) | 4.41<br>(0.59)   | 4.59<br>(0.54) | 4.60<br>(0.55) | 4.41<br>(0.49) | 4.45<br>(0.56)   | 4.48<br>(0.53) | 4.43<br>(0.65)   | 4.42<br>(0.55) | 4.48<br>(0.59)    |
| Task performance Mean (SD)               | 4.04<br>(0.93) | -  | 4.10<br>(0.96) | 4.10<br>(1.17)    | 4.00<br>(0.99) | 4.01<br>(1.12)   | 4.36<br>(0.84) | 4.20<br>(0.95) | 3.97<br>(0.97) | 3.70 *<br>(1.15) | 3.85<br>(1.11) | 4.02<br>(0.94)   | 4.06<br>(0.98) | 4.01<br>(1.07)    |

T1= Time 1 (Baseline)

T2 = Time 2 (6 months post intervention period)

\* p&lt;0.05

\*\* p&lt;0.001

Table 4. Frequency, preventability and severity of patient-reported incidents and concerns

|                                                                            | Practice A             |    | Practice B               |    | Practice C                                   |                                  | Practice D |    | Practice E             |                      | Practice F             |                        | Total                  |                      |
|----------------------------------------------------------------------------|------------------------|----|--------------------------|----|----------------------------------------------|----------------------------------|------------|----|------------------------|----------------------|------------------------|------------------------|------------------------|----------------------|
|                                                                            | T1                     | T2 | T1                       | T2 | T1                                           | T2                               | T1         | T2 | T1                     | T2                   | T1                     | T2                     | T1                     | T2                   |
| No. of patient reported incidents†                                         | 1                      | -  | 4                        | 0  | 2                                            | 2                                | 0          | 0  | 3                      | 3                    | 1                      | 4                      | 11                     | 9                    |
| Average preventability rating (range)‡                                     | Definitely preventable | -  | Probably not preventable | -  | Definitely preventable, Probably preventable | Probably preventable, Don't know | -          | -  | Definitely preventable | Probably preventable | Definitely preventable | Definitely preventable | Definitely preventable | Probably preventable |
| Average severity rating (range)^                                           | 10 (10)                | -  | 7.3 (6-8)                | -  | 6.5 (3-10)                                   | 8.5 (7-10)                       | -          | -  | 6.7 (6-8)              | 6.3 (6-7)            | 9 (9)                  | 7.6 (7-9)              | 7.4 (3-10)             | 7.4 (6-10)           |
| No. of patient reported concerns#                                          | 6                      | -  | 13                       | 6  | 9                                            | 3                                | 2          | 2  | 8                      | 6                    | 4                      | 8                      | 42                     | 25                   |
| No. of patient reported concerns that were classified as safety incidents~ | 3                      | -  | 7                        | 3  | 1                                            | 1                                | 1          | 2  | 3                      | 3                    | 2                      | 3                      | 17                     | 12                   |

† Patient reported incidents using Patient Incident Reporting Tool

‡ Preventability scale consists of five options 'Definitely preventable', 'Probably preventable', 'Probably not preventable', 'Definitely not preventable', and 'Don't know'. Expressed as the median due to it being an ordinal variable.

^ Patient-rated severity scale is 1-10 with 1=not serious at all and 10=extremely serious.

# Patient reported concerns mentioned in 'other comments' section of the survey (total number of negative comments)

~ Patient reported incidents mentioned in the 'other comments' section of the survey (PISA classification system was used to classify safety incidents<sup>68</sup>)

T1= Time 1 (Baseline)

T2 = Time 2 (6 months post intervention period)

**Box 1. Recommendations for intervention improvement**

- Simplification of intervention framework
- Structured and defined intervention actions plans and corresponding safety measures for each of the PC PMOS domains of safety
- Electronic data collection platforms to enable real-time patient feedback
- Increased external intervention facilitation
- Modification to questionnaire collecting patient reported safety incidents

peer review only



1  
2  
3  
4  
5  
6  
7  
8  
9  
10  
11  
12  
13  
14  
15  
16  
17  
18  
19  
20  
21  
22  
23  
24  
25  
26  
27  
28  
29  
30  
31  
32  
33  
34  
35  
36  
37  
38  
39  
40  
41  
42  
43  
44  
45  
46

**Figure legend**

**Figure 1. Intervention phases**

For peer review only

Figure 1. Intervention phases

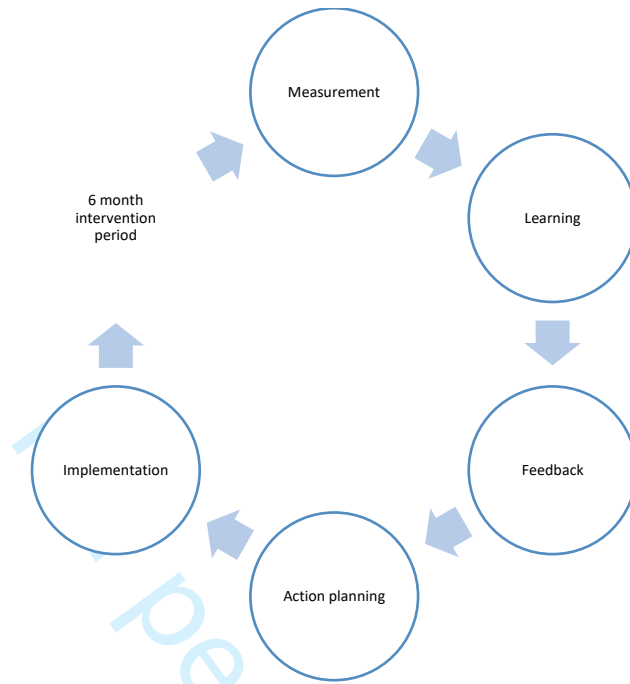

## Appendix 1. Practice profile summary

|                                      | Practice A      | Practice B      | Practice C      | Practice D   | Practice E             | Practice F |
|--------------------------------------|-----------------|-----------------|-----------------|--------------|------------------------|------------|
| Estimated number of unique patients  | 9106            | 12000           | N/A             | 7232         | 3200                   | 21725      |
| Estimated patient gender (%)         |                 |                 |                 |              |                        |            |
| Male                                 | 40.79           | 45              | 50              | 47.91        | 45                     | 46         |
| Female                               | 54.5            | 55              | 50              | 50.28        | 55                     | 54         |
| Other or not recorded                | 4.71            | 0               | 0               | 1.8          | 0                      | 0          |
| Estimated age distribution (%)       |                 |                 |                 |              |                        |            |
| Birth – 10 years                     | 10.1            | 9               | 8.58            | 13.7         | 8.1                    | 11         |
| 11 – 18 years                        | 8.2             | 6               | 8.30            | 9.9          | 10.7                   | 13         |
| 19 – 45 years                        | 34.3            | 26              | 24.02           | 35.8         | 25.7                   | 32         |
| 46 – 64 years                        | 26.9            | 29              | 27.36           | 24.1         | 31.7                   | 27         |
| 65 – 79 years                        | 15.2            | 21              | 22.13           | 11.9         | 17.1                   | 11         |
| 80+ years                            | 5.3             | 9               | 9.60            | 4.6          | 6.3                    | 6          |
| Number of patients seen per week     | N/A             | 850             | 271             | 326          | 245                    | 1408       |
| Number of patients seen per month    | N/A             | 3624            | 1084            | 1030         | N/A                    | 5471       |
| Number of new patients last month    | N/A             | 69              | 50              | 58           | N/A                    | 180        |
| Number of consultations per week     | 576             | 1584            | 454             | 393          | 245                    | 1260       |
| Number of consultations per month    | 2148            | 5832            | 1816            | 1809         | N/A                    | 5216       |
| Top 5 patient diagnosis / conditions | Mental health   | Hypertension    | Hypertension    | Hypertension | Diabetes               | Obesity    |
|                                      | Musculoskeletal | Hyperlipidaemia | Hyperlipidaemia | Asthma       | Ischemic heart disease | Diabetes   |

|                                                          | Practice A                                                                                                               | Practice B                                                                                                                              | Practice C                                                                                                                                            | Practice D                                                                  | Practice E                                                                               | Practice F                                                       |
|----------------------------------------------------------|--------------------------------------------------------------------------------------------------------------------------|-----------------------------------------------------------------------------------------------------------------------------------------|-------------------------------------------------------------------------------------------------------------------------------------------------------|-----------------------------------------------------------------------------|------------------------------------------------------------------------------------------|------------------------------------------------------------------|
|                                                          | Skin problems                                                                                                            | Asthma                                                                                                                                  | Osteoarthritis                                                                                                                                        | Depression                                                                  | Hypertension                                                                             | Asthma                                                           |
|                                                          | Diabetes                                                                                                                 | Depression                                                                                                                              | Asthma                                                                                                                                                | Hypercholesterolaemia / hyperlipidaemia                                     | Osteoarthritis                                                                           | Hypertension                                                     |
|                                                          | Ischemic heart disease                                                                                                   | Diabetes                                                                                                                                | Depression                                                                                                                                            | Osteoarthritis                                                              | Renal disease                                                                            | Dyslipidemia                                                     |
| General Practitioners (Number/FTE)                       | 8/6                                                                                                                      | -/12                                                                                                                                    | 3/3                                                                                                                                                   | 6/4.5                                                                       | -/3                                                                                      | 12/-                                                             |
| Practice Nurses (Number/FTE)                             | 5/-                                                                                                                      | -/4                                                                                                                                     | 3/1.96                                                                                                                                                | 4/1.6                                                                       | -/1                                                                                      | -/3.9                                                            |
| Reception / Administration staff (Number/FTE)            | 7/-                                                                                                                      | -/13                                                                                                                                    | 6/2.54                                                                                                                                                | 5/3.5                                                                       | -/2.5                                                                                    | -/9.8                                                            |
| Practice Manager (Number/FTE)                            | 1/-                                                                                                                      | -/1                                                                                                                                     | 1/-                                                                                                                                                   | 1/0.8                                                                       | -/0.8                                                                                    | 1/-                                                              |
| Medical students (Number/FTE)                            | N/A                                                                                                                      | N/A                                                                                                                                     | 1/1                                                                                                                                                   | N/A                                                                         | N/A                                                                                      | N/A                                                              |
| General Practitioner Average consultation time (minutes) | 20                                                                                                                       | 15                                                                                                                                      | 20                                                                                                                                                    | 23                                                                          | 25                                                                                       | 15                                                               |
| Practice Nurse Average consultation time (minutes)       | 30                                                                                                                       | 30                                                                                                                                      | 15                                                                                                                                                    | 30                                                                          | 20                                                                                       | 15                                                               |
| Additional services offered at practice                  | Physiotherapy, Podiatry, Psychologist/counseling, Youth mental health service, Speech Pathologist, Exercise physiologist | Psychologists, Psychotherapist, Men's health clinic, Chronic disease management, Dietician, Diabetic educator, CVC program, neurologist | Dietitian, Psychiatrist, Podiatry, Australian Hearing – Audio screening, Video conferencing – specialist, Visiting specialists consulting at clinic – | Physiotherapy, Psychology, Dentist, Audiology, Visiting Physicians/surgeons | Osteopath, Chiropractor, Australian Hearing, Psychologist, General surgeon consultations | Diabetes Educator(s), Dietitian, Podiatrist, Mental health nurse |

|                                             | Practice A                                                                                               | Practice B                                                                                                                                                                                                                         | Practice C                                                                                                                                                                                                       | Practice D | Practice E                                                                                                                                                          | Practice F                                                                                                                                                                        |
|---------------------------------------------|----------------------------------------------------------------------------------------------------------|------------------------------------------------------------------------------------------------------------------------------------------------------------------------------------------------------------------------------------|------------------------------------------------------------------------------------------------------------------------------------------------------------------------------------------------------------------|------------|---------------------------------------------------------------------------------------------------------------------------------------------------------------------|-----------------------------------------------------------------------------------------------------------------------------------------------------------------------------------|
|                                             |                                                                                                          |                                                                                                                                                                                                                                    | Paediatrics,<br>orthopaedic,<br>Surgeon – general,<br>Physician, Oncology                                                                                                                                        |            |                                                                                                                                                                     |                                                                                                                                                                                   |
| Accreditation status /<br>year              | Yes / 2018                                                                                               | Yes / 2018                                                                                                                                                                                                                         | Yes / 2018                                                                                                                                                                                                       | Yes / 2017 | Yes / 2018                                                                                                                                                          | Yes / 2018                                                                                                                                                                        |
| Past safety and quality<br>improvement work | <ul style="list-style-type: none"> <li>Participation in Collaboratives (2013) – Diabetes wave</li> </ul> | <ul style="list-style-type: none"> <li>Improvement foundation workshops for chronic kidney disease and diabetes</li> <li>Closing the gap for ATSI patients</li> <li>Research study investigating aspirin in the elderly</li> </ul> | <ul style="list-style-type: none"> <li>Participation in Collaboratives Wave 10</li> <li>Research studies investigating aspirin in the elderly, mental health, mothers health, bowel cancer prevention</li> </ul> | N/A        | <ul style="list-style-type: none"> <li>Participation in Collaboratives – Wave 9 – Diabetes</li> <li>2018 – Practice Accreditation and Improvement Survey</li> </ul> | <ul style="list-style-type: none"> <li>Participation in Collaboratives wave projects – Cardiovascular disease &amp; Chronic kidney disease and Improving Diabetes care</li> </ul> |

FTE: Full Time Equivalent

N/A: Not available

## Appendix 2. Crude response rate calculation

|                                                                                        | Practice B |      | Practice C |      | Practice D |      | Practice E |      | Practice F |      | Total |      |
|----------------------------------------------------------------------------------------|------------|------|------------|------|------------|------|------------|------|------------|------|-------|------|
|                                                                                        | T1         | T2   | T1    | T2   |
| Patients completing PC PMOS                                                            | 198        | 197  | 148        | 153  | 130        | 145  | 150        | 158  | 113        | 258  | 739   | 911  |
| All patients presenting for appointment during data collection timeframes <sup>†</sup> | 392        | 489  | 278        | 170  | 550        | 637  | 316        | 220  | 4136       | 8262 | 5672  | 9778 |
| Response rate (%)                                                                      | 50.5       | 40.3 | 53.2       | 90.0 | 23.6       | 22.8 | 47.5       | 71.8 | 2.7        | 3.1  | 13.0  | 9.3  |

† Data on patients presenting for their appointment was extracted for 5 out of the 6 practices using Pen CS software for general practice clinics. Due to data unavailability for one practice, the response rate calculation is a crude estimate only.

T1= Time 1 (Baseline)

T2 = Time 2 (6 months post intervention period)

| T1 and T2 combined | Patients completing PC PMOS (n=1,650) | All patients presenting for appointment during data collection timeframes (n=15,450) <sup>†</sup> |
|--------------------|---------------------------------------|---------------------------------------------------------------------------------------------------|
| Gender (n)         |                                       |                                                                                                   |
| Male (n, %)        | 527 (32.5%)                           | 6701 (43.5%)                                                                                      |
| Female (n, %)      | 1097 (67.5%)                          | 8706 (56.5%)*                                                                                     |
| Age (mean, SD)     | 55.5 (18.2)                           | 48.3 (24.6)*                                                                                      |

\* Statistically significant difference  $p=0.000$

Patients completing the PC PMOS were significantly more likely to be older and female.

1  
2  
3  
4  
5  
6  
7  
8  
9  
10  
11  
12  
13  
14  
15  
16  
17  
18  
19  
20  
21  
22  
23  
24  
25  
26  
27  
28  
29  
30  
31  
32  
33  
34  
35  
36  
37  
38  
39  
40  
41  
42  
43  
44  
45  
46

**Appendix 3. Staff percent positive scores of patient safety culture**

|                                                              | Practice A   |              | Practice B   |              | Practice C   |              | Practice D   |              | Practice E   |              | Practice F   |              | Total        |              |
|--------------------------------------------------------------|--------------|--------------|--------------|--------------|--------------|--------------|--------------|--------------|--------------|--------------|--------------|--------------|--------------|--------------|
|                                                              | T1<br>% (SD) | T2<br>% (SD) |
| Safety culture composites                                    |              |              |              |              |              |              |              |              |              |              |              |              |              |              |
| Communication About Error                                    | 91 (0.2)     | -            | 64 (0.3)     | 50 (0.3)     | 69 (0.2)     | 72 (0.3)     | 94 (0.2)     | 97 (0.1)     | 75 (0.4)     | 75 (0.4)     | 58 (0.4)     | 55 (0.4)     | 72 (0.3)     | 65 (0.3)     |
| Communication Openness                                       | 81 (0.2)     | -            | 66 (0.3)     | 47 (0.4)     | 72 (0.3)     | 64 (0.5)     | 97 (0.1)     | 97 (0.1)     | 70 (0.3)     | 79 (0.3)     | 50 (0.4)     | 50 (0.4)     | 71 (0.3)     | 61 (0.4)     |
| Office Processes and Standardisation                         | 63 (0.2)     | -            | 75 (0.2)     | 66 (0.3)     | 69 (0.3)     | 58 (0.4)     | 91 (0.2)     | 97 (0.1)     | 75 (0.3)     | 83 (0.2)     | 64 (0.3)     | 55 (0.4)     | 73 (0.3)     | 69 (0.3)     |
| Organisational Learning                                      | 100 (0.0)    | -            | 70 (0.4)     | 59 (0.4)     | 70 (0.4)     | 59 (0.5)     | 92 (0.2)     | 74 (0.4)     | 67 (0.5)     | 61 (0.5)     | 33 (0.4)     | 58 (0.3)     | 71 (0.4)     | 61 (0.4)     |
| Overall Perceptions of Patient Safety and Quality            | 72 (0.3)     | -            | 69 (0.4)     | 58 (0.4)     | 72 (0.4)     | 53 (0.5)     | 94 (0.1)     | 78 (0.4)     | 75 (0.4)     | 79 (0.4)     | 39 (0.4)     | 61 (0.3)     | 69 (0.4)     | 63 (0.4)     |
| Owner/Managing Partner/Leadership Support for Patient Safety | 28 (0.4)     | -            | 68 (0.4)     | 50 (0.4)     | 61 (0.4)     | 67 (0.4)     | 56 (0.5)     | 89 (0.3)     | 85 (0.2)     | 91 (0.2)     | 31 (0.4)     | 41 (0.4)     | 56 (0.4)     | 61 (0.4)     |
| Patient Care Tracking/Follow-up                              | 75 (0.4)     | -            | 61 (0.4)     | 61 (0.4)     | 92 (0.1)     | 89 (0.3)     | 91 (0.2)     | 92 (0.1)     | 90 (0.2)     | 75 (0.2)     | 69 (0.4)     | 64 (0.3)     | 75 (0.3)     | 72 (0.3)     |
| Staff Training                                               | 92 (0.2)     | -            | 83 (0.2)     | 85 (0.3)     | 82 (0.4)     | 70 (0.4)     | 83 (0.4)     | 96 (0.1)     | 80 (0.3)     | 89 (0.2)     | 70 (0.4)     | 52 (0.4)     | 82 (0.3)     | 78 (0.3)     |
| Teamwork                                                     | 94 (0.2)     | -            | 85 (0.2)     | 75 (0.3)     | 89 (0.1)     | 53 (0.3)*    | 100 (0.0)    | 100 (0.0)    | 90 (0.1)     | 92 (0.1)     | 86 (0.2)     | 89 (0.2)     | 89 (0.2)     | 80 (0.3)*    |
| Work Pressure and Pace                                       | 23 (0.4)     | -            | 58 (0.3)     | 50 (0.4)     | 31 (0.3)     | 58 (0.4)     | 63 (0.3)     | 86 (0.1)*    | 55 (0.3)     | 67 (0.3)     | 42 (0.5)     | 41 (0.4)     | 47 (0.4)     | 57 (0.4)     |
| Average Across Composites                                    | 72 (0.2)     | -            | 70 (0.2)     | 60 (0.2)     | 71 (0.2)     | 64 (0.3)     | 86 (0.1)     | 91 (0.1)     | 76 (0.3)     | 79 (0.2)     | 54 (0.2)     | 56 (0.3)     | 71 (0.2)     | 67 (0.2)     |
| Overall Rating on Patient Safety (QG2)                       | 88 (0.4)     | -            | 68 (0.5)     | 68 (0.5)     | 78 (0.4)     | 67 (0.5)     | 88 (0.4)     | 100 (0.0)    | 80 (0.5)     | 100 (0.0)    | 44 (0.5)     | 55 (0.5)     | 72 (0.5)     | 74 (0.4)     |

\* statistically significant at p<0.05

**Appendix 4. Frequency of safety incidents recorded in practice clinical risk management system**

|              | <b>Baseline</b> | <b>Intervention period</b> |
|--------------|-----------------|----------------------------|
| Practice A   | 3               | 6                          |
| Practice B   | 5               | 1                          |
| Practice C   | 4               | 6                          |
| Practice D   | 4               | 3                          |
| Practice E   | 1               | 0                          |
| Practice F   | 15              | 5                          |
| <b>Total</b> | <b>32</b>       | <b>21</b>                  |

Baseline – number of safety incidents recorded from previous 12 months

Intervention period – number of safety incidents recorded during intervention period
