# Supplementary material for: Patient feedback for safety improvement in primary care: results from a feasibility study
Source: PubMed Central journal article supplement — BMJ Open. 2020 Jun 21;10(6):e037887. doi: 10.1136/bmjopen-2020-037887 (PMC7307531; doi:10.1136/bmjopen-2020-037887), 2020-06-21
Supplement: bmjopen-2020-037887supp001.pdf [file bmjopen-2020-037887supp001.pdf]

**Appendix 1. Practice profile summary**

|                                      | Practice A      | Practice B      | Practice C      | Practice D   | Practice E             | Practice F |
|--------------------------------------|-----------------|-----------------|-----------------|--------------|------------------------|------------|
| Estimated number of unique patients  | 9106            | 12000           | N/A             | 7232         | 3200                   | 21725      |
| Estimated patient gender (%)         |                 |                 |                 |              |                        |            |
| Male                                 | 40.79           | 45              | 50              | 47.91        | 45                     | 46         |
| Female                               | 54.5            | 55              | 50              | 50.28        | 55                     | 54         |
| Other or not recorded                | 4.71            | 0               | 0               | 1.8          | 0                      | 0          |
| Estimated age distribution (%)       |                 |                 |                 |              |                        |            |
| Birth – 10 years                     | 10.1            | 9               | 8.58            | 13.7         | 8.1                    | 11         |
| 11 – 18 years                        | 8.2             | 6               | 8.30            | 9.9          | 10.7                   | 13         |
| 19 – 45 years                        | 34.3            | 26              | 24.02           | 35.8         | 25.7                   | 32         |
| 46 – 64 years                        | 26.9            | 29              | 27.36           | 24.1         | 31.7                   | 27         |
| 65 – 79 years                        | 15.2            | 21              | 22.13           | 11.9         | 17.1                   | 11         |
| 80+ years                            | 5.3             | 9               | 9.60            | 4.6          | 6.3                    | 6          |
| Number of patients seen per week     | N/A             | 850             | 271             | 326          | 245                    | 1408       |
| Number of patients seen per month    | N/A             | 3624            | 1084            | 1030         | N/A                    | 5471       |
| Number of new patients last month    | N/A             | 69              | 50              | 58           | N/A                    | 180        |
| Number of consultations per week     | 576             | 1584            | 454             | 393          | 245                    | 1260       |
| Number of consultations per month    | 2148            | 5832            | 1816            | 1809         | N/A                    | 5216       |
| Top 5 patient diagnosis / conditions | Mental health   | Hypertension    | Hypertension    | Hypertension | Diabetes               | Obesity    |
|                                      | Musculoskeletal | Hyperlipidaemia | Hyperlipidaemia | Asthma       | Ischemic heart disease | Diabetes   |

|                                                          | Practice A                                                                                                               | Practice B                                                                                                                              | Practice C                                                                                                                                            | Practice D                                                                  | Practice E                                                                               | Practice F                                                       |
|----------------------------------------------------------|--------------------------------------------------------------------------------------------------------------------------|-----------------------------------------------------------------------------------------------------------------------------------------|-------------------------------------------------------------------------------------------------------------------------------------------------------|-----------------------------------------------------------------------------|------------------------------------------------------------------------------------------|------------------------------------------------------------------|
|                                                          | Skin problems                                                                                                            | Asthma                                                                                                                                  | Osteoarthritis                                                                                                                                        | Depression                                                                  | Hypertension                                                                             | Asthma                                                           |
|                                                          | Diabetes                                                                                                                 | Depression                                                                                                                              | Asthma                                                                                                                                                | Hypercholesterolaemia / hyperlipidaemia                                     | Osteoarthritis                                                                           | Hypertension                                                     |
|                                                          | Ischemic heart disease                                                                                                   | Diabetes                                                                                                                                | Depression                                                                                                                                            | Osteoarthritis                                                              | Renal disease                                                                            | Dyslipidemia                                                     |
| General Practitioners (Number/FTE)                       | 8/6                                                                                                                      | -/12                                                                                                                                    | 3/3                                                                                                                                                   | 6/4.5                                                                       | -/3                                                                                      | 12/-                                                             |
| Practice Nurses (Number/FTE)                             | 5/-                                                                                                                      | -/4                                                                                                                                     | 3/1.96                                                                                                                                                | 4/1.6                                                                       | -/1                                                                                      | -/3.9                                                            |
| Reception / Administration staff (Number/FTE)            | 7/-                                                                                                                      | -/13                                                                                                                                    | 6/2.54                                                                                                                                                | 5/3.5                                                                       | -/2.5                                                                                    | -/9.8                                                            |
| Practice Manager (Number/FTE)                            | 1/-                                                                                                                      | -/1                                                                                                                                     | 1/-                                                                                                                                                   | 1/0.8                                                                       | -/0.8                                                                                    | 1/-                                                              |
| Medical students (Number/FTE)                            | N/A                                                                                                                      | N/A                                                                                                                                     | 1/1                                                                                                                                                   | N/A                                                                         | N/A                                                                                      | N/A                                                              |
| General Practitioner Average consultation time (minutes) | 20                                                                                                                       | 15                                                                                                                                      | 20                                                                                                                                                    | 23                                                                          | 25                                                                                       | 15                                                               |
| Practice Nurse Average consultation time (minutes)       | 30                                                                                                                       | 30                                                                                                                                      | 15                                                                                                                                                    | 30                                                                          | 20                                                                                       | 15                                                               |
| Additional services offered at practice                  | Physiotherapy, Podiatry, Psychologist/counseling, Youth mental health service, Speech Pathologist, Exercise physiologist | Psychologists, Psychotherapist, Men's health clinic, Chronic disease management, Dietician, Diabetic educator, CVC program, neurologist | Dietitian, Psychiatrist, Podiatry, Australian Hearing – Audio screening, Video conferencing – specialist, Visiting specialists consulting at clinic – | Physiotherapy, Psychology, Dentist, Audiology, Visiting Physicians/surgeons | Osteopath, Chiropractor, Australian Hearing, Psychologist, General surgeon consultations | Diabetes Educator(s), Dietitian, Podiatrist, Mental health nurse |

|                                          | Practice A                                                                                                 | Practice B                                                                                                                                                                                                                               | Practice C                                                                                                                                                                                                           | Practice D | Practice E                                                                                                                                                              | Practice F                                                                                                                                                                          |
|------------------------------------------|------------------------------------------------------------------------------------------------------------|------------------------------------------------------------------------------------------------------------------------------------------------------------------------------------------------------------------------------------------|----------------------------------------------------------------------------------------------------------------------------------------------------------------------------------------------------------------------|------------|-------------------------------------------------------------------------------------------------------------------------------------------------------------------------|-------------------------------------------------------------------------------------------------------------------------------------------------------------------------------------|
|                                          |                                                                                                            |                                                                                                                                                                                                                                          | Paediatrics, orthopaedic, Surgeon – general, Physician, Oncology                                                                                                                                                     |            |                                                                                                                                                                         |                                                                                                                                                                                     |
| Accreditation status / year              | Yes / 2018                                                                                                 | Yes / 2018                                                                                                                                                                                                                               | Yes / 2018                                                                                                                                                                                                           | Yes / 2017 | Yes / 2018                                                                                                                                                              | Yes / 2018                                                                                                                                                                          |
| Past safety and quality improvement work | <ul style="list-style-type: none"> <li>• Participation in Collaboratives (2013) – Diabetes wave</li> </ul> | <ul style="list-style-type: none"> <li>• Improvement foundation workshops for chronic kidney disease and diabetes</li> <li>• Closing the gap for ATSI patients</li> <li>• Research study investigating aspirin in the elderly</li> </ul> | <ul style="list-style-type: none"> <li>• Participation in Collaboratives Wave 10</li> <li>• Research studies investigating aspirin in the elderly, mental health, mothers health, bowel cancer prevention</li> </ul> | N/A        | <ul style="list-style-type: none"> <li>• Participation in Collaboratives – Wave 9 – Diabetes</li> <li>• 2018 – Practice Accreditation and Improvement Survey</li> </ul> | <ul style="list-style-type: none"> <li>• Participation in Collaboratives wave projects – Cardiovascular disease &amp; Chronic kidney disease and Improving Diabetes care</li> </ul> |

FTE: Full Time Equivalent

N/A: Not available
