# Supplementary material for: Patient feedback for safety improvement in primary care: results from a feasibility study
Source: PubMed Central journal article supplement — BMJ Open. 2020 Jun 21;10(6):e037887. doi: 10.1136/bmjopen-2020-037887 (PMC7307531; doi:10.1136/bmjopen-2020-037887), 2020-06-21
Supplement: bmjopen-2020-037887supp002.pdf [file bmjopen-2020-037887supp002.pdf]

**Appendix 2. Crude response rate calculation**

|                                                                                        | Practice B |      | Practice C |      | Practice D |      | Practice E |      | Practice F |      | Total |      |
|----------------------------------------------------------------------------------------|------------|------|------------|------|------------|------|------------|------|------------|------|-------|------|
|                                                                                        | T1         | T2   | T1    | T2   |
| Patients completing PC PMOS                                                            | 198        | 197  | 148        | 153  | 130        | 145  | 150        | 158  | 113        | 258  | 739   | 911  |
| All patients presenting for appointment during data collection timeframes <sup>†</sup> | 392        | 489  | 278        | 170  | 550        | 637  | 316        | 220  | 4136       | 8262 | 5672  | 9778 |
| Response rate (%)                                                                      | 50.5       | 40.3 | 53.2       | 90.0 | 23.6       | 22.8 | 47.5       | 71.8 | 2.7        | 3.1  | 13.0  | 9.3  |

† Data on patients presenting for their appointment was extracted for 5 out of the 6 practices using Pen CS software for general practice clinics. Due to data unavailability for one practice, the response rate calculation is a crude estimate only.

T1= Time 1 (Baseline)

T2 = Time 2 (6 months post intervention period)

| T1 and T2 combined | Patients completing PC PMOS (n=1,650) | All patients presenting for appointment during data collection timeframes (n=15,450) <sup>†</sup> |
|--------------------|---------------------------------------|---------------------------------------------------------------------------------------------------|
| Gender (n)         |                                       |                                                                                                   |
| Male (n, %)        | 527 (32.5%)                           | 6701 (43.5%)                                                                                      |
| Female (n, %)      | 1097 (67.5%)                          | 8706 (56.5%)*                                                                                     |
| Age (mean, SD)     | 55.5 (18.2)                           | 48.3 (24.6)*                                                                                      |

\* Statistically significant difference  $p=0.000$

Patients completing the PC PMOS were significantly more likely to be older and female.
