# Supplementary material for: Patient feedback for safety improvement in primary care: results from a feasibility study
Source: PubMed Central journal article supplement — BMJ Open. 2020 Jun 21;10(6):e037887. doi: 10.1136/bmjopen-2020-037887 (PMC7307531; doi:10.1136/bmjopen-2020-037887), 2020-06-21
Supplement: bmjopen-2020-037887supp003.pdf [file bmjopen-2020-037887supp003.pdf]

## Appendix 3. Staff percent positive scores of patient safety culture

|                                                              | Practice A   |              | Practice B   |              | Practice C   |              | Practice D   |              | Practice E   |              | Practice F   |              | Total        |              |
|--------------------------------------------------------------|--------------|--------------|--------------|--------------|--------------|--------------|--------------|--------------|--------------|--------------|--------------|--------------|--------------|--------------|
|                                                              | T1<br>% (SD) | T2<br>% (SD) |
| Safety culture composites                                    |              |              |              |              |              |              |              |              |              |              |              |              |              |              |
| Communication About Error                                    | 91 (0.2)     | -            | 64 (0.3)     | 50 (0.3)     | 69 (0.2)     | 72 (0.3)     | 94 (0.2)     | 97 (0.1)     | 75 (0.4)     | 75 (0.4)     | 58 (0.4)     | 55 (0.4)     | 72 (0.3)     | 65 (0.3)     |
| Communication Openness                                       | 81 (0.2)     | -            | 66 (0.3)     | 47 (0.4)     | 72 (0.3)     | 64 (0.5)     | 97 (0.1)     | 97 (0.1)     | 70 (0.3)     | 79 (0.3)     | 50 (0.4)     | 50 (0.4)     | 71 (0.3)     | 61 (0.4)     |
| Office Processes and Standardisation                         | 63 (0.2)     | -            | 75 (0.2)     | 66 (0.3)     | 69 (0.3)     | 58 (0.4)     | 91 (0.2)     | 97 (0.1)     | 75 (0.3)     | 83 (0.2)     | 64 (0.3)     | 55 (0.4)     | 73 (0.3)     | 69 (0.3)     |
| Organisational Learning                                      | 100 (0.0)    | -            | 70 (0.4)     | 59 (0.4)     | 70 (0.4)     | 59 (0.5)     | 92 (0.2)     | 74 (0.4)     | 67 (0.5)     | 61 (0.5)     | 33 (0.4)     | 58 (0.3)     | 71 (0.4)     | 61 (0.4)     |
| Overall Perceptions of Patient Safety and Quality            | 72 (0.3)     | -            | 69 (0.4)     | 58 (0.4)     | 72 (0.4)     | 53 (0.5)     | 94 (0.1)     | 78 (0.4)     | 75 (0.4)     | 79 (0.4)     | 39 (0.4)     | 61 (0.3)     | 69 (0.4)     | 63 (0.4)     |
| Owner/Managing Partner/Leadership Support for Patient Safety | 28 (0.4)     | -            | 68 (0.4)     | 50 (0.4)     | 61 (0.4)     | 67 (0.4)     | 56 (0.5)     | 89 (0.3)     | 85 (0.2)     | 91 (0.2)     | 31 (0.4)     | 41 (0.4)     | 56 (0.4)     | 61 (0.4)     |
| Patient Care Tracking/Follow-up                              | 75 (0.4)     | -            | 61 (0.4)     | 61 (0.4)     | 92 (0.1)     | 89 (0.3)     | 91 (0.2)     | 92 (0.1)     | 90 (0.2)     | 75 (0.2)     | 69 (0.4)     | 64 (0.3)     | 75 (0.3)     | 72 (0.3)     |
| Staff Training                                               | 92 (0.2)     | -            | 83 (0.2)     | 85 (0.3)     | 82 (0.4)     | 70 (0.4)     | 83 (0.4)     | 96 (0.1)     | 80 (0.3)     | 89 (0.2)     | 70 (.04)     | 52 (0.4)     | 82 (0.3)     | 78 (0.3)     |
| Teamwork                                                     | 94 (0.2)     | -            | 85 (0.2)     | 75 (0.3)     | 89 (0.1)     | 53 (0.3)*    | 100 (0.0)    | 100 (0.0)    | 90 (0.1)     | 92 (0.1)     | 86 (0.2)     | 89 (0.2)     | 89 (0.2)     | 80 (0.3)*    |
| Work Pressure and Pace                                       | 23 (0.4)     | -            | 58 (0.3)     | 50 (0.4)     | 31 (0.3)     | 58 (0.4)     | 63 (0.3)     | 86 (0.1)*    | 55 (0.3)     | 67 (0.3)     | 42 (0.5)     | 41 (0.4)     | 47 (0.4)     | 57 (0.4)     |
| Average Across Composites                                    | 72 (0.2)     | -            | 70 (0.2)     | 60 (0.2)     | 71 (0.2)     | 64 (0.3)     | 86 (0.1)     | 91 (0.1)     | 76 (0.3)     | 79 (0.2)     | 54 (0.2)     | 56 (0.3)     | 71 (0.2)     | 67 (0.2)     |
| Overall Rating on Patient Safety (QG2)                       | 88 (0.4)     | -            | 68 (0.5)     | 68 (0.5)     | 78 (0.4)     | 67 (0.5)     | 88 (0.4)     | 100 (0.0)    | 80 (0.5)     | 100 (0.0)    | 44 (0.5)     | 55 (0.5)     | 72 (0.5)     | 74 (0.4)     |

\* statistically significant at  $p < 0.05$
