# Supplementary material for: Patient feedback for safety improvement in primary care: results from a feasibility study
Source: PubMed Central journal article supplement — BMJ Open. 2020 Jun 21;10(6):e037887. doi: 10.1136/bmjopen-2020-037887 (PMC7307531; doi:10.1136/bmjopen-2020-037887), 2020-06-21
Supplement: bmjopen-2020-037887supp004.pdf [file bmjopen-2020-037887supp004.pdf]

**Appendix 4. Frequency of safety incidents recorded in practice clinical risk management system**

|              | <b>Baseline</b> | <b>Intervention period</b> |
|--------------|-----------------|----------------------------|
| Practice A   | 3               | 6                          |
| Practice B   | 5               | 1                          |
| Practice C   | 4               | 6                          |
| Practice D   | 4               | 3                          |
| Practice E   | 1               | 0                          |
| Practice F   | 15              | 5                          |
| <b>Total</b> | <b>32</b>       | <b>21</b>                  |

Baseline – number of safety incidents recorded from previous 12 months

Intervention period – number of safety incidents recorded during intervention period
